# Supplementary material
Source: publisher figshare collection journal article supplement (https://gsajournals.figshare.com/ndownloader/files/23623271)
Supplement: Supplementary file 1 [file 23623271]

## Sheet: SupTable7
Table S7: Functional term enrichment analyses for each UpSet category
term	clusteroccurences	genomeoccurences	pvalue	correctedpvalue	oddsratio	group
IPR002300:Aminoacyl-tRNA synthetase, class Ia	7	13	0.00103323	1	7.11107	wBm_chung_2019
IPR009008:Valyl/Leucyl/Isoleucyl-tRNA synthetase, editing domain	6	10	0.00117381	1	9.0648	wBm_chung_2019
IPR013155:Methionyl/Valyl/Leucyl/Isoleucyl-tRNA synthetase, anticodon-binding	6	10	0.00117381	1	9.0648	wBm_chung_2019
GO:0002161:aminoacyl-tRNA editing activity	6	10	0.00117381	0.434311	9.0648	wBm_chung_2019
IPR009080:Aminoacyl-tRNA synthetase, class Ia, anticodon-binding	8	20	0.00480862	1	4.0713	wBm_chung_2019
IPR005177:Bifunctional kinase-pyrophosphorylase	4	6	0.00541022	1	11.8557	wBm_chung_2019
IPR026565:Putative pyruvate, phosphate dikinase regulatory protein	4	6	0.00541022	1	11.8557	wBm_chung_2019
GO:0005524:ATP binding	42	205	0.00845137	1	1.85529	wBm_chung_2019
GO:0006418:tRNA aminoacylation for protein translation	16	59	0.0109432	1	2.36036	wBm_chung_2019
IPR002314:Aminoacyl-tRNA synthetase, class II (G/ P/ S/T)	7	19	0.0140408	1	3.52317	wBm_chung_2019
IPR000266:Ribosomal protein S17/S11	4	8	0.019853	1	5.91865	wBm_chung_2019
IPR001288:Translation initiation factor 3	4	8	0.019853	1	5.91865	wBm_chung_2019
IPR019814:Translation initiation factor 3, N-terminal	4	8	0.019853	1	5.91865	wBm_chung_2019
IPR019815:Translation initiation factor 3, C-terminal	4	8	0.019853	1	5.91865	wBm_chung_2019
IPR019979:Ribosomal protein S17, conserved site	4	8	0.019853	1	5.91865	wBm_chung_2019
IPR019984:30S ribosomal protein S17	4	8	0.019853	1	5.91865	wBm_chung_2019
IPR036787:Translation initiation factor 3 (IF-3), N-terminal domain superfamily	4	8	0.019853	1	5.91865	wBm_chung_2019
IPR036788:Translation initiation factor 3 (IF-3), C-terminal domain superfamily	4	8	0.019853	1	5.91865	wBm_chung_2019
GO:0016772:transferase activity, transferring phosphorus-containing groups	8	25	0.0216458	1	2.84963	wBm_chung_2019
GO:0030145:manganese ion binding	5	12	0.0217778	1	4.25558	wBm_chung_2019
IPR035985:Ubiquitin-activating enzyme	2	2	0.0218359	1	Inf	wBm_chung_2019
GO:0008641:small protein activating enzyme activity	2	2	0.0218359	1	Inf	wBm_chung_2019
GO:0004812:aminoacyl-tRNA ligase activity	16	64	0.0245469	1	2.0941	wBm_chung_2019
IPR002220:DapA-like	3	5	0.0253288	1	8.80285	wBm_chung_2019
IPR002301:Isoleucine-tRNA ligase	3	5	0.0253288	1	8.80285	wBm_chung_2019
IPR002303:Valine-tRNA ligase	3	5	0.0253288	1	8.80285	wBm_chung_2019
IPR002792:TRAM domain	3	5	0.0253288	1	8.80285	wBm_chung_2019
IPR005263:4-hydroxy-tetrahydrodipicolinate synthase, DapA	3	5	0.0253288	1	8.80285	wBm_chung_2019
IPR006463:tRNA-2-methylthio-N(6)-dimethylallyladenosine synthase MiaB	3	5	0.0253288	1	8.80285	wBm_chung_2019
IPR010236:ISC system FeS cluster assembly, HscA chaperone	3	5	0.0253288	1	8.80285	wBm_chung_2019
IPR020624:Schiff base-forming aldolase, conserved site	3	5	0.0253288	1	8.80285	wBm_chung_2019
IPR020625:Schiff base-forming aldolase, active site	3	5	0.0253288	1	8.80285	wBm_chung_2019
IPR022874:Valine-tRNA ligase, type 2	3	5	0.0253288	1	8.80285	wBm_chung_2019
IPR023586:Isoleucine-tRNA ligase, type 2	3	5	0.0253288	1	8.80285	wBm_chung_2019
IPR033705:Valyl tRNA synthetase, anticodon-binding domain	3	5	0.0253288	1	8.80285	wBm_chung_2019
IPR033709:Isoleucyl tRNA synthetase type 2, anticodon-binding domain	3	5	0.0253288	1	8.80285	wBm_chung_2019
GO:0006428:isoleucyl-tRNA aminoacylation	3	5	0.0253288	1	8.80285	wBm_chung_2019
GO:0006438:valyl-tRNA aminoacylation	3	5	0.0253288	1	8.80285	wBm_chung_2019
GO:0004822:isoleucine-tRNA ligase activity	3	5	0.0253288	1	8.80285	wBm_chung_2019
GO:0004832:valine-tRNA ligase activity	3	5	0.0253288	1	8.80285	wBm_chung_2019
GO:0008840:4-hydroxy-tetrahydrodipicolinate synthase	3	5	0.0253288	1	8.80285	wBm_chung_2019
GO:0000166:nucleotide binding	19	82	0.0299867	1	1.91047	wBm_chung_2019
IPR000361:FeS cluster biogenesis	5	13	0.031294	1	3.71804	wBm_chung_2019
IPR012947:Threonyl/alanyl tRNA synthetase, SAD	5	13	0.031294	1	3.71804	wBm_chung_2019
IPR018163:Threonyl/alanyl tRNA synthetase, class II-like, putative editing domain	5	13	0.031294	1	3.71804	wBm_chung_2019
IPR016092:FeS cluster insertion protein	4	9	0.0317167	1	4.72968	wBm_chung_2019
IPR017870:FeS cluster insertion, C-terminal, conserved site	4	9	0.0317167	1	4.72968	wBm_chung_2019
IPR018109:Folylpolyglutamate synthetase, conserved site	4	9	0.0317167	1	4.72968	wBm_chung_2019
GO:0097428:protein maturation by iron-sulfur cluster transfer	4	9	0.0317167	1	4.72968	wBm_chung_2019
GO:0004326:tetrahydrofolylpolyglutamate synthase activity	4	9	0.0317167	1	4.72968	wBm_chung_2019
GO:0005198:structural molecule activity	4	9	0.0317167	1	4.72968	wBm_chung_2019
IPR000473:Ribosomal protein L36	3	6	0.0452473	1	5.86531	wBm_chung_2019
IPR003557:Cytochrome c-type biogenesis protein CcmC	3	6	0.0452473	1	5.86531	wBm_chung_2019
IPR005762:UDP-N-acetylmuramoylalanine-D-glutamate ligase	3	6	0.0452473	1	5.86531	wBm_chung_2019
IPR017861:Kae1/TsaD family	3	6	0.0452473	1	5.86531	wBm_chung_2019
IPR022450:tRNA N6-adenosine threonylcarbamoyltransferase, TsaD	3	6	0.0452473	1	5.86531	wBm_chung_2019
IPR022896:Triosephosphate isomerase, bacterial/eukaryotic	3	6	0.0452473	1	5.86531	wBm_chung_2019
IPR035977:Ribosomal protein L36 superfamily	3	6	0.0452473	1	5.86531	wBm_chung_2019
GO:0008764:UDP-N-acetylmuramoylalanine-D-glutamate ligase activity	3	6	0.0452473	1	5.86531	wBm_chung_2019
IPR035903:HesB-like domain superfamily	5	15	0.0571786	1	2.96523	wBm_chung_2019
IPR011697:Peptidase C26	2	3	0.0591417	1	11.6233	wBm_chung_2019
IPR011060:Ribulose-phosphate binding barrel	4	11	0.0655593	1	3.36915	wBm_chung_2019
IPR036225:SRP/SRP receptor, N-terminal	4	11	0.0655593	1	3.36915	wBm_chung_2019
GO:0015986:ATP synthesis coupled proton transport	1	31	0.0690856	1	0.182901	wBm_chung_2019
IPR015421:Pyridoxal phosphate-dependent transferase, major region, subdomain 1	1	32	0.0701378	1	0.17666	wBm_chung_2019
IPR015422:Pyridoxal phosphate-dependent transferase, subdomain 2	1	32	0.0701378	1	0.17666	wBm_chung_2019
IPR015424:Pyridoxal phosphate-dependent transferase	1	32	0.0701378	1	0.17666	wBm_chung_2019
IPR000114:Ribosomal protein L16	3	7	0.0707896	1	4.39508	wBm_chung_2019
IPR000374:Phosphatidate cytidylyltransferase	3	7	0.0707896	1	4.39508	wBm_chung_2019
IPR001063:Ribosomal protein L22/L17	3	7	0.0707896	1	4.39508	wBm_chung_2019
IPR001351:Ribosomal protein S3, C-terminal	3	7	0.0707896	1	4.39508	wBm_chung_2019
IPR001441:Decaprenyl diphosphate synthase-like	3	7	0.0707896	1	4.39508	wBm_chung_2019
IPR002222:Ribosomal protein S19/S15	3	7	0.0707896	1	4.39508	wBm_chung_2019
IPR002316:Proline-tRNA ligase, class IIa	3	7	0.0707896	1	4.39508	wBm_chung_2019
IPR002661:Ribosome recycling factor	3	7	0.0707896	1	4.39508	wBm_chung_2019
IPR003798:DNA recombination RmuC	3	7	0.0707896	1	4.39508	wBm_chung_2019
IPR004500:Prolyl-tRNA synthetase, class IIa, bacterial-type	3	7	0.0707896	1	4.39508	wBm_chung_2019
IPR005704:Ribosomal protein S3, bacterial	3	7	0.0707896	1	4.39508	wBm_chung_2019
IPR005727:Ribosomal protein L22, bacterial/chloroplast-type	3	7	0.0707896	1	4.39508	wBm_chung_2019
IPR005732:Ribosomal protein S19, bacterial-type	3	7	0.0707896	1	4.39508	wBm_chung_2019
IPR005791:Protein translocase subunit SecD	3	7	0.0707896	1	4.39508	wBm_chung_2019
IPR006169:GTP1/OBG domain	3	7	0.0707896	1	4.39508	wBm_chung_2019
IPR012677:Nucleotide-binding alpha-beta plait domain	3	7	0.0707896	1	4.39508	wBm_chung_2019
IPR012678:Ribosomal protein L23/L15e core domain	3	7	0.0707896	1	4.39508	wBm_chung_2019
IPR013025:Ribosomal protein L25/L23	3	7	0.0707896	1	4.39508	wBm_chung_2019
IPR014100:GTP-binding protein Obg/CgtA	3	7	0.0707896	1	4.39508	wBm_chung_2019
IPR016180:Ribosomal protein L10e/L16	3	7	0.0707896	1	4.39508	wBm_chung_2019
IPR018280:Ribosomal protein S3, conserved site	3	7	0.0707896	1	4.39508	wBm_chung_2019
IPR018520:Di-trans-poly-cis-decaprenylcistransferase-like, conserved site	3	7	0.0707896	1	4.39508	wBm_chung_2019
IPR020798:Ribosomal protein L16, conserved site	3	7	0.0707896	1	4.39508	wBm_chung_2019
IPR023575:Ribosomal protein S19, superfamily	3	7	0.0707896	1	4.39508	wBm_chung_2019
IPR023584:Ribosome recycling factor domain	3	7	0.0707896	1	4.39508	wBm_chung_2019
IPR023716:Proline-tRNA ligase, class IIa, type 2	3	7	0.0707896	1	4.39508	wBm_chung_2019
IPR033730:Prokaryote proline-tRNA ligase core domain	3	7	0.0707896	1	4.39508	wBm_chung_2019
IPR035101:GTP-binding protein, Obg-type	3	7	0.0707896	1	4.39508	wBm_chung_2019
IPR036191:RRF superfamily	3	7	0.0707896	1	4.39508	wBm_chung_2019
IPR036394:Ribosomal protein L22/L17 superfamily	3	7	0.0707896	1	4.39508	wBm_chung_2019
IPR036419:Ribosomal protein S3, C-terminal domain superfamily	3	7	0.0707896	1	4.39508	wBm_chung_2019
IPR036424:Decaprenyl diphosphate synthase-like superfamily	3	7	0.0707896	1	4.39508	wBm_chung_2019
IPR036726:GTP1/OBG domain superfamily	3	7	0.0707896	1	4.39508	wBm_chung_2019
IPR036920:Ribosomal protein L10e/L16 superfamily	3	7	0.0707896	1	4.39508	wBm_chung_2019
IPR042039:HscA chaperone, nucleotide-binding domain	3	7	0.0707896	1	4.39508	wBm_chung_2019
GO:0006433:prolyl-tRNA aminoacylation	3	7	0.0707896	1	4.39508	wBm_chung_2019
GO:0004827:proline-tRNA ligase activity	3	7	0.0707896	1	4.39508	wBm_chung_2019
GO:0008137:NADH dehydrogenase (ubiquinone) activity	9	34	0.0769793	1	2.17343	wBm_chung_2019
IPR000905:Gcp-like domain	4	12	0.08745	1	2.94365	wBm_chung_2019
IPR007039:Conjugal transfer TrbC/type IV secretion VirB2	4	12	0.08745	1	2.94365	wBm_chung_2019
GO:0002949:tRNA threonylcarbamoyladenosine modification	4	12	0.08745	1	2.94365	wBm_chung_2019
IPR001412:Aminoacyl-tRNA synthetase, class I, conserved site	9	36	0.0899277	1	2.00511	wBm_chung_2019
GO:0006096:glycolytic process	6	20	0.0995993	1	2.55197	wBm_chung_2019
IPR000218:Ribosomal protein L14P	3	8	0.101352	1	3.51174	wBm_chung_2019
IPR000652:Triosephosphate isomerase	3	8	0.101352	1	3.51174	wBm_chung_2019
IPR001227:Acyl transferase domain	3	8	0.101352	1	3.51174	wBm_chung_2019
IPR001854:Ribosomal protein L29/L36	3	8	0.101352	1	3.51174	wBm_chung_2019
IPR002150:Ribosomal protein L31	3	8	0.101352	1	3.51174	wBm_chung_2019
IPR002320:Threonine-tRNA ligase, class IIa	3	8	0.101352	1	3.51174	wBm_chung_2019
IPR003256:Ribosomal protein L24	3	8	0.101352	1	3.51174	wBm_chung_2019
IPR004410:Malonyl CoA-acyl carrier protein transacylase, FabD-type	3	8	0.101352	1	3.51174	wBm_chung_2019
IPR005745:Ribosomal protein L14P, bacterial-type	3	8	0.101352	1	3.51174	wBm_chung_2019
IPR005825:Ribosomal protein L24/L26, conserved site	3	8	0.101352	1	3.51174	wBm_chung_2019
IPR005839:Methylthiotransferase	3	8	0.101352	1	3.51174	wBm_chung_2019
IPR005995:Phosphoglycerate mutase, 2,3-bisphosphoglycerate-independent	3	8	0.101352	1	3.51174	wBm_chung_2019
IPR006124:Metalloenzyme	3	8	0.101352	1	3.51174	wBm_chung_2019
IPR011258:BPG-independent PGAM, N-terminal	3	8	0.101352	1	3.51174	wBm_chung_2019
IPR013848:Methylthiotransferase, N-terminal	3	8	0.101352	1	3.51174	wBm_chung_2019
IPR014043:Acyl transferase	3	8	0.101352	1	3.51174	wBm_chung_2019
IPR016036:Malonyl-CoA ACP transacylase, ACP-binding	3	8	0.101352	1	3.51174	wBm_chung_2019
IPR017850:Alkaline-phosphatase-like, core domain	3	8	0.101352	1	3.51174	wBm_chung_2019
IPR020612:Methylthiotransferase, conserved site	3	8	0.101352	1	3.51174	wBm_chung_2019
IPR020801:Polyketide synthase, acyl transferase domain	3	8	0.101352	1	3.51174	wBm_chung_2019
IPR020861:Triosephosphate isomerase, active site	3	8	0.101352	1	3.51174	wBm_chung_2019
IPR023404:Radical SAM, alpha/beta horseshoe	3	8	0.101352	1	3.51174	wBm_chung_2019
IPR024925:Malonyl CoA-acyl carrier protein transacylase	3	8	0.101352	1	3.51174	wBm_chung_2019
IPR033728:Threonine-tRNA ligase catalytic core domain	3	8	0.101352	1	3.51174	wBm_chung_2019
IPR035990:Triosephosphate isomerase superfamily	3	8	0.101352	1	3.51174	wBm_chung_2019
IPR036049:Ribosomal protein L29/L35 superfamily	3	8	0.101352	1	3.51174	wBm_chung_2019
IPR036646:BPG-independent phosphoglycerate mutase, domain B superfamily	3	8	0.101352	1	3.51174	wBm_chung_2019
IPR036853:Ribosomal protein L14 superfamily	3	8	0.101352	1	3.51174	wBm_chung_2019
IPR038135:Methylthiotransferase, N-terminal domain superfamily	3	8	0.101352	1	3.51174	wBm_chung_2019
IPR041988:Ribosomal Protein L26/L24, KOW domain	3	8	0.101352	1	3.51174	wBm_chung_2019
IPR042105:Ribosomal protein L31 superfamily	3	8	0.101352	1	3.51174	wBm_chung_2019
GO:0006007:glucose catabolic process	3	8	0.101352	1	3.51174	wBm_chung_2019
GO:0006435:threonyl-tRNA aminoacylation	3	8	0.101352	1	3.51174	wBm_chung_2019
GO:0004314:[acyl-carrier-protein] S-malonyltransferase activity	3	8	0.101352	1	3.51174	wBm_chung_2019
GO:0004619:phosphoglycerate mutase activity	3	8	0.101352	1	3.51174	wBm_chung_2019
GO:0004807:triose-phosphate isomerase activity	3	8	0.101352	1	3.51174	wBm_chung_2019
GO:0004829:threonine-tRNA ligase activity	3	8	0.101352	1	3.51174	wBm_chung_2019
IPR000627:Intradiol ring-cleavage dioxygenase, C-terminal	2	4	0.106931	1	5.81312	wBm_chung_2019
IPR000819:Peptidase M17, leucyl aminopeptidase, C-terminal	2	4	0.106931	1	5.81312	wBm_chung_2019
IPR001036:Acriflavin resistance protein	2	4	0.106931	1	5.81312	wBm_chung_2019
IPR008283:Peptidase M17, leucyl aminopeptidase, N-terminal	2	4	0.106931	1	5.81312	wBm_chung_2019
IPR011356:Peptidase M17, leucine aminopeptidase/peptidase B	2	4	0.106931	1	5.81312	wBm_chung_2019
IPR013346:Ribonucleotide reductase, class I , alpha subunit	2	4	0.106931	1	5.81312	wBm_chung_2019
IPR015889:Intradiol ring-cleavage dioxygenase, core	2	4	0.106931	1	5.81312	wBm_chung_2019
IPR023042:Peptidase M17, leucine aminopeptidase	2	4	0.106931	1	5.81312	wBm_chung_2019
IPR033454:RecG, wedge domain	2	4	0.106931	1	5.81312	wBm_chung_2019
IPR039387:Protocatechuate 3,4-dioxygenase	2	4	0.106931	1	5.81312	wBm_chung_2019
GO:0006725:cellular aromatic compound metabolic process	2	4	0.106931	1	5.81312	wBm_chung_2019
GO:0016702:oxidoreductase activity, acting on single donors with incorporation of molecular oxygen, incorporation of two atoms of oxygen	2	4	0.106931	1	5.81312	wBm_chung_2019
GO:0018578:protocatechuate 3,4-dioxygenase activity	2	4	0.106931	1	5.81312	wBm_chung_2019
GO:0006400:tRNA modification	6	21	0.108298	1	2.37782	wBm_chung_2019
IPR002514:Transposase IS3/IS911family	4	13	0.112408	1	2.61247	wBm_chung_2019
IPR022645:Protein-export membrane protein SecD/SecF, bacterial	4	13	0.112408	1	2.61247	wBm_chung_2019
IPR022813:Protein-export membrane protein SecD/SecF, archaeal and bacterial	4	13	0.112408	1	2.61247	wBm_chung_2019
GO:0009396:folic acid-containing compound biosynthetic process	4	13	0.112408	1	2.61247	wBm_chung_2019
IPR014729:Rossmann-like alpha/beta/alpha sandwich fold	13	58	0.118264	1	1.75968	wBm_chung_2019
GO:0055114:oxidation-reduction process	29	155	0.1214	1	1.46023	wBm_chung_2019
IPR013785:Aldolase-type TIM barrel	13	59	0.122214	1	1.71809	wBm_chung_2019
IPR004154:Anticodon-binding	6	23	0.133587	1	2.09084	wBm_chung_2019
IPR036621:Anticodon-binding domain superfamily	6	23	0.133587	1	2.09084	wBm_chung_2019
GO:0006886:intracellular protein transport	6	23	0.133587	1	2.09084	wBm_chung_2019
GO:0015450:P-P-bond-hydrolysis-driven protein transmembrane transporter activity	6	23	0.133587	1	2.09084	wBm_chung_2019
IPR000860:Porphobilinogen deaminase	3	9	0.136169	1	2.92254	wBm_chung_2019
IPR002871:NIF system FeS cluster assembly, NifU, N-terminal	3	9	0.136169	1	2.92254	wBm_chung_2019
IPR003231:Acyl carrier protein (ACP)	3	9	0.136169	1	2.92254	wBm_chung_2019
IPR004390:Signal-recognition particle receptor FtsY	3	9	0.136169	1	2.92254	wBm_chung_2019
IPR009081:Phosphopantetheine binding ACP domain	3	9	0.136169	1	2.92254	wBm_chung_2019
IPR011339:ISC system FeS cluster assembly, IscU scaffold	3	9	0.136169	1	2.92254	wBm_chung_2019
IPR016035:Acyl transferase/acyl hydrolase/lysophospholipase	3	9	0.136169	1	2.92254	wBm_chung_2019
IPR022417:Porphobilinogen deaminase, N-terminal	3	9	0.136169	1	2.92254	wBm_chung_2019
IPR022418:Porphobilinogen deaminase, C-terminal	3	9	0.136169	1	2.92254	wBm_chung_2019
IPR022419:Porphobilinogen deaminase, dipyrromethane cofactor binding site	3	9	0.136169	1	2.92254	wBm_chung_2019
IPR036736:ACP-like superfamily	3	9	0.136169	1	2.92254	wBm_chung_2019
IPR036803:Porphobilinogen deaminase, C-terminal domain superfamily	3	9	0.136169	1	2.92254	wBm_chung_2019
GO:0018160:peptidyl-pyrromethane cofactor linkage	3	9	0.136169	1	2.92254	wBm_chung_2019
GO:0004418:hydroxymethylbilane synthase activity	3	9	0.136169	1	2.92254	wBm_chung_2019
IPR000092:Polyprenyl synthetase	4	14	0.140145	1	2.34763	wBm_chung_2019
IPR000713:Mur ligase, N-terminal catalytic domain	4	14	0.140145	1	2.34763	wBm_chung_2019
IPR008949:Isoprenoid synthase domain	4	14	0.140145	1	2.34763	wBm_chung_2019
GO:0008121:ubiquinol-cytochrome-c reductase activity	4	14	0.140145	1	2.34763	wBm_chung_2019
IPR006073:GTP binding domain	8	34	0.141527	1	1.8334	wBm_chung_2019
IPR008921:DNA polymerase III, clamp loader complex, gamma/delta/delta subunit, C-terminal	0	15	0.144399	1	0	wBm_chung_2019
IPR014746:Glutamine synthetase/guanido kinase, catalytic domain	0	15	0.144399	1	0	wBm_chung_2019
IPR029026:tRNA (guanine-N1-)-methyltransferase, N-terminal	0	15	0.144399	1	0	wBm_chung_2019
IPR029028:Alpha/beta knot methyltransferases	0	15	0.144399	1	0	wBm_chung_2019
GO:0005737:cytoplasm	22	114	0.14714	1	1.48292	wBm_chung_2019
IPR001638:Solute-binding protein family 3/N-terminal domain of MltF	1	1	0.148438	1	Inf	wBm_chung_2019
IPR001669:Arginine repressor	1	1	0.148438	1	Inf	wBm_chung_2019
IPR004316:SWEET sugar transporter	1	1	0.148438	1	Inf	wBm_chung_2019
IPR006282:Thiamin pyrophosphokinase	1	1	0.148438	1	Inf	wBm_chung_2019
IPR006433:Prohead protease	1	1	0.148438	1	Inf	wBm_chung_2019
IPR007344:GrpB/Dephospho-CoA kinase	1	1	0.148438	1	Inf	wBm_chung_2019
IPR007371:Thiamin pyrophosphokinase, catalytic domain	1	1	0.148438	1	Inf	wBm_chung_2019
IPR007373:Thiamin pyrophosphokinase, vitamin B1-binding domain	1	1	0.148438	1	Inf	wBm_chung_2019
IPR010065:Amino acid ABC transporter, permease protein, 3-TM domain	1	1	0.148438	1	Inf	wBm_chung_2019
IPR018313:Solute-binding protein family 3, conserved site	1	1	0.148438	1	Inf	wBm_chung_2019
IPR020899:Arginine repressor, C-terminal	1	1	0.148438	1	Inf	wBm_chung_2019
IPR020900:Arginine repressor, DNA-binding domain	1	1	0.148438	1	Inf	wBm_chung_2019
IPR022385:Rhs repeat-associated core	1	1	0.148438	1	Inf	wBm_chung_2019
IPR024455:Phage capsid	1	1	0.148438	1	Inf	wBm_chung_2019
IPR028047:Latrotoxin, C-terminal domain	1	1	0.148438	1	Inf	wBm_chung_2019
IPR028250:Thiol:disulfide interchange protein DsbD, N-terminal domain	1	1	0.148438	1	Inf	wBm_chung_2019
IPR032733:HAUS augmin-like complex subunit 3, N-terminal	1	1	0.148438	1	Inf	wBm_chung_2019
IPR036251:Arginine repressor, C-terminal domain superfamily	1	1	0.148438	1	Inf	wBm_chung_2019
IPR036371:Thiamin pyrophosphokinase, thiamin-binding domain superfamily	1	1	0.148438	1	Inf	wBm_chung_2019
IPR036759:Thiamin pyrophosphokinase, catalytic domain superfamily	1	1	0.148438	1	Inf	wBm_chung_2019
GO:0006772:thiamine metabolic process	1	1	0.148438	1	Inf	wBm_chung_2019
GO:0009229:thiamine diphosphate biosynthetic process	1	1	0.148438	1	Inf	wBm_chung_2019
GO:0071705:nitrogen compound transport	1	1	0.148438	1	Inf	wBm_chung_2019
GO:0004788:thiamine diphosphokinase activity	1	1	0.148438	1	Inf	wBm_chung_2019
GO:0030975:thiamine binding	1	1	0.148438	1	Inf	wBm_chung_2019
GO:0034618:arginine binding	1	1	0.148438	1	Inf	wBm_chung_2019
GO:0005506:iron ion binding	6	24	0.14982	1	1.97126	wBm_chung_2019
IPR011545:DEAD/DEAH box helicase domain	5	17	0.15515	1	2.46301	wBm_chung_2019
GO:0030170:pyridoxal phosphate binding	1	27	0.160074	1	0.212663	wBm_chung_2019
IPR000056:Ribulose-phosphate 3-epimerase-like	2	5	0.161332	1	3.87319	wBm_chung_2019
IPR000424:Primosome PriB/single-strand DNA-binding	2	5	0.161332	1	3.87319	wBm_chung_2019
IPR000589:Ribosomal protein S15	2	5	0.161332	1	3.87319	wBm_chung_2019
IPR001162:UvrC family homology region	2	5	0.161332	1	3.87319	wBm_chung_2019
IPR001247:Exoribonuclease, phosphorolytic domain 1	2	5	0.161332	1	3.87319	wBm_chung_2019
IPR001457:NADH:ubiquinone/plastoquinone oxidoreductase, chain 6	2	5	0.161332	1	3.87319	wBm_chung_2019
IPR001646:Pentapeptide repeat	2	5	0.161332	1	3.87319	wBm_chung_2019
IPR001980:Coenzyme A biosynthesis protein	2	5	0.161332	1	3.87319	wBm_chung_2019
IPR002318:Alanine-tRNA ligase, class IIc	2	5	0.161332	1	3.87319	wBm_chung_2019
IPR004088:K Homology domain, type 1	2	5	0.161332	1	3.87319	wBm_chung_2019
IPR004346:CagE, TrbE, VirB component of type IV transporter system	2	5	0.161332	1	3.87319	wBm_chung_2019
IPR004791:UvrABC system, subunit C	2	5	0.161332	1	3.87319	wBm_chung_2019
IPR004821:Cytidyltransferase-like domain	2	5	0.161332	1	3.87319	wBm_chung_2019
IPR005290:Ribosomal protein S15, bacterial-type	2	5	0.161332	1	3.87319	wBm_chung_2019
IPR009068:S15/NS1, RNA-binding	2	5	0.161332	1	3.87319	wBm_chung_2019
IPR011344:Single-stranded DNA-binding protein	2	5	0.161332	1	3.87319	wBm_chung_2019
IPR012162:Polyribonucleotide nucleotidyltransferase	2	5	0.161332	1	3.87319	wBm_chung_2019
IPR015847:Exoribonuclease, phosphorolytic domain 2	2	5	0.161332	1	3.87319	wBm_chung_2019
IPR015848:Polyribonucleotide nucleotidyltransferase, RNA-binding domain	2	5	0.161332	1	3.87319	wBm_chung_2019
IPR017689:Outer membrane protein assembly factor BamD	2	5	0.161332	1	3.87319	wBm_chung_2019
IPR018162:Alanine-tRNA ligase, class IIc, anti-codon-binding domain	2	5	0.161332	1	3.87319	wBm_chung_2019
IPR018164:Alanyl-tRNA synthetase, class IIc, N-terminal	2	5	0.161332	1	3.87319	wBm_chung_2019
IPR018165:Alanyl-tRNA synthetase, class IIc, core domain	2	5	0.161332	1	3.87319	wBm_chung_2019
IPR018753:Azospirillum phage Cd, Gp10	2	5	0.161332	1	3.87319	wBm_chung_2019
IPR019533:Peptidase S26	2	5	0.161332	1	3.87319	wBm_chung_2019
IPR023033:Alanine-tRNA ligase, eukaryota/bacteria	2	5	0.161332	1	3.87319	wBm_chung_2019
IPR024199:Uncharacterised conserved protein, DsbB-like	2	5	0.161332	1	3.87319	wBm_chung_2019
IPR026019:Ribulose-phosphate 3-epimerase	2	5	0.161332	1	3.87319	wBm_chung_2019
IPR027408:PNPase/RNase PH domain	2	5	0.161332	1	3.87319	wBm_chung_2019
IPR033900:Porin domain, Gram-negative type	2	5	0.161332	1	3.87319	wBm_chung_2019
IPR036345:Exoribonuclease, PH domain 2 superfamily	2	5	0.161332	1	3.87319	wBm_chung_2019
IPR036612:K Homology domain, type 1 superfamily	2	5	0.161332	1	3.87319	wBm_chung_2019
IPR038476:UvrC homology region 2 superfamily	2	5	0.161332	1	3.87319	wBm_chung_2019
IPR039565:Outer membrane lipoprotein BamD-like	2	5	0.161332	1	3.87319	wBm_chung_2019
IPR042106:NADH-ubiquinone/plastoquinone oxidoreductase chain 6, subunit NuoJ	2	5	0.161332	1	3.87319	wBm_chung_2019
GO:0006098:pentose-phosphate shunt	2	5	0.161332	1	3.87319	wBm_chung_2019
GO:0006402:mRNA catabolic process	2	5	0.161332	1	3.87319	wBm_chung_2019
GO:0006419:alanyl-tRNA aminoacylation	2	5	0.161332	1	3.87319	wBm_chung_2019
GO:0004595:pantetheine-phosphate adenylyltransferase activity	2	5	0.161332	1	3.87319	wBm_chung_2019
GO:0004654:polyribonucleotide nucleotidyltransferase activity	2	5	0.161332	1	3.87319	wBm_chung_2019
GO:0004750:ribulose-phosphate 3-epimerase activity	2	5	0.161332	1	3.87319	wBm_chung_2019
GO:0004813:alanine-tRNA ligase activity	2	5	0.161332	1	3.87319	wBm_chung_2019
GO:0009381:excinuclease ABC activity	2	5	0.161332	1	3.87319	wBm_chung_2019
GO:0015288:porin activity	2	5	0.161332	1	3.87319	wBm_chung_2019
GO:0016857:racemase and epimerase activity, acting on carbohydrates and derivatives	2	5	0.161332	1	3.87319	wBm_chung_2019
IPR029048:Heat shock protein 70kD, C-terminal domain	3	10	0.174407	1	2.50142	wBm_chung_2019
IPR033749:Polyprenyl synthetase, conserved site	3	10	0.174407	1	2.50142	wBm_chung_2019
IPR034704:L28p-like	3	10	0.174407	1	2.50142	wBm_chung_2019
GO:0051259:protein oligomerization	3	10	0.174407	1	2.50142	wBm_chung_2019
IPR001048:Aspartate/glutamate/uridylate kinase	5	20	0.199782	1	1.96049	wBm_chung_2019
IPR036393:Acetylglutamate kinase-like superfamily	5	20	0.199782	1	1.96049	wBm_chung_2019
GO:0006265:DNA topological change	5	20	0.199782	1	1.96049	wBm_chung_2019
GO:0005694:chromosome	5	20	0.199782	1	1.96049	wBm_chung_2019
GO:0016787:hydrolase activity	6	66	0.201658	1	0.545393	wBm_chung_2019
GO:0015935:small ribosomal subunit	7	31	0.201789	1	1.72506	wBm_chung_2019
GO:0016740:transferase activity	7	31	0.201789	1	1.72506	wBm_chung_2019
GO:0005525:GTP binding	14	68	0.204375	1	1.5703	wBm_chung_2019
GO:0051536:iron-sulfur cluster binding	10	48	0.211185	1	1.5684	wBm_chung_2019
IPR001078:2-oxoacid dehydrogenase acyltransferase, catalytic domain	3	11	0.215225	1	2.18544	wBm_chung_2019
IPR001107:Band 7 domain	3	11	0.215225	1	2.18544	wBm_chung_2019
IPR004167:E3-binding domain	3	11	0.215225	1	2.18544	wBm_chung_2019
IPR017945:DHBP synthase RibB-like alpha/beta domain	3	11	0.215225	1	2.18544	wBm_chung_2019
IPR022646:Protein-export membrane protein SecD/SecF/SecDF, conserved site	3	11	0.215225	1	2.18544	wBm_chung_2019
IPR023213:Chloramphenicol acetyltransferase-like domain	3	11	0.215225	1	2.18544	wBm_chung_2019
IPR036013:Band 7/SPFH domain superfamily	3	11	0.215225	1	2.18544	wBm_chung_2019
IPR036625:E3-binding domain superfamily	3	11	0.215225	1	2.18544	wBm_chung_2019
GO:0008565:protein transporter activity	3	11	0.215225	1	2.18544	wBm_chung_2019
IPR000788:Ribonucleotide reductase large subunit, C-terminal	2	6	0.219374	1	2.90188	wBm_chung_2019
IPR001754:Orotidine 5'-phosphate decarboxylase domain	2	6	0.219374	1	2.90188	wBm_chung_2019
IPR001844:Chaperonin Cpn60	2	6	0.219374	1	2.90188	wBm_chung_2019
IPR002423:Chaperonin Cpn60/TCP-1 family	2	6	0.219374	1	2.90188	wBm_chung_2019
IPR002876:Transcriptional regulator TACO1-like	2	6	0.219374	1	2.90188	wBm_chung_2019
IPR002933:Peptidase M20	2	6	0.219374	1	2.90188	wBm_chung_2019
IPR003148:Regulator of K+ conductance, N-terminal	2	6	0.219374	1	2.90188	wBm_chung_2019
IPR004398:RNA methyltransferase, RsmD	2	6	0.219374	1	2.90188	wBm_chung_2019
IPR004588:4-hydroxy-3-methylbut-2-en-1-yl diphosphate synthase, bacterial-type	2	6	0.219374	1	2.90188	wBm_chung_2019
IPR004771:K+/H+ exchanger	2	6	0.219374	1	2.90188	wBm_chung_2019
IPR004776:Membrane transport protein	2	6	0.219374	1	2.90188	wBm_chung_2019
IPR005941:Succinyl-diaminopimelate desuccinylase, proteobacteria	2	6	0.219374	1	2.90188	wBm_chung_2019
IPR005982:Thioredoxin reductase	2	6	0.219374	1	2.90188	wBm_chung_2019
IPR006153:Cation/H+ exchanger	2	6	0.219374	1	2.90188	wBm_chung_2019
IPR006222:Glycine cleavage T-protein-like, N-terminal	2	6	0.219374	1	2.90188	wBm_chung_2019
IPR006297:Elongation factor 4	2	6	0.219374	1	2.90188	wBm_chung_2019
IPR008255:Pyridine nucleotide-disulphide oxidoreductase, class-II, active site	2	6	0.219374	1	2.90188	wBm_chung_2019
IPR008926:Ribonucleotide reductase R1 subunit, N-terminal	2	6	0.219374	1	2.90188	wBm_chung_2019
IPR010128:ATPase, type I secretion system, PrtD	2	6	0.219374	1	2.90188	wBm_chung_2019
IPR011650:Peptidase M20, dimerisation domain	2	6	0.219374	1	2.90188	wBm_chung_2019
IPR013509:Ribonucleotide reductase large subunit, N-terminal	2	6	0.219374	1	2.90188	wBm_chung_2019
IPR013842:GTP-binding protein LepA, C-terminal	2	6	0.219374	1	2.90188	wBm_chung_2019
IPR014732:Orotidine 5'-phosphate decarboxylase	2	6	0.219374	1	2.90188	wBm_chung_2019
IPR015413:Methionyl/Leucyl tRNA synthetase	2	6	0.219374	1	2.90188	wBm_chung_2019
IPR016425:4-hydroxy-3-methylbut-2-en-1-yl diphosphate synthase, bacterial	2	6	0.219374	1	2.90188	wBm_chung_2019
IPR017703:YgfZ/GcvT conserved site	2	6	0.219374	1	2.90188	wBm_chung_2019
IPR017856:Integrase, N-terminal zinc-binding domain-like	2	6	0.219374	1	2.90188	wBm_chung_2019
IPR018089:Orotidine 5'-phosphate decarboxylase, active site	2	6	0.219374	1	2.90188	wBm_chung_2019
IPR018130:Ribosomal protein S2, conserved site	2	6	0.219374	1	2.90188	wBm_chung_2019
IPR018370:Chaperonin Cpn60, conserved site	2	6	0.219374	1	2.90188	wBm_chung_2019
IPR019401:Zinc finger, CHCC-type	2	6	0.219374	1	2.90188	wBm_chung_2019
IPR020818:GroES chaperonin family	2	6	0.219374	1	2.90188	wBm_chung_2019
IPR020828:Glyceraldehyde 3-phosphate dehydrogenase, NAD(P) binding domain	2	6	0.219374	1	2.90188	wBm_chung_2019
IPR020829:Glyceraldehyde 3-phosphate dehydrogenase, catalytic domain	2	6	0.219374	1	2.90188	wBm_chung_2019
IPR020831:Glyceraldehyde/Erythrose phosphate dehydrogenase family	2	6	0.219374	1	2.90188	wBm_chung_2019
IPR022310:NAD/GMP synthase	2	6	0.219374	1	2.90188	wBm_chung_2019
IPR024089:Proline dehydrogenase PutA, domain I/II	2	6	0.219374	1	2.90188	wBm_chung_2019
IPR026564:Transcriptional regulator TACO1-like, domain 3	2	6	0.219374	1	2.90188	wBm_chung_2019
IPR027409:GroEL-like apical domain	2	6	0.219374	1	2.90188	wBm_chung_2019
IPR027410:TCP-1-like chaperonin intermediate domain	2	6	0.219374	1	2.90188	wBm_chung_2019
IPR027413:GroEL-like equatorial domain	2	6	0.219374	1	2.90188	wBm_chung_2019
IPR028896:Aminomethyltransferase/Dimethylsulfonioproprionate demethylase DmdA	2	6	0.219374	1	2.90188	wBm_chung_2019
IPR029072:YebC-like	2	6	0.219374	1	2.90188	wBm_chung_2019
IPR035654:Elongation factor 4, domain IV	2	6	0.219374	1	2.90188	wBm_chung_2019
IPR036264:Bacterial exopeptidase dimerisation domain	2	6	0.219374	1	2.90188	wBm_chung_2019
IPR037124:GroES chaperonin superfamily	2	6	0.219374	1	2.90188	wBm_chung_2019
IPR038363:LepA, C-terminal domain superfamily	2	6	0.219374	1	2.90188	wBm_chung_2019
IPR038770:Sodium/solute symporter superfamily	2	6	0.219374	1	2.90188	wBm_chung_2019
GO:0006813:potassium ion transport	2	6	0.219374	1	2.90188	wBm_chung_2019
GO:0019430:removal of superoxide radicals	2	6	0.219374	1	2.90188	wBm_chung_2019
GO:0030253:protein secretion by the type I secretion system	2	6	0.219374	1	2.90188	wBm_chung_2019
GO:0031167:rRNA methylation	2	6	0.219374	1	2.90188	wBm_chung_2019
GO:0044205:'de novo' UMP biosynthetic process	2	6	0.219374	1	2.90188	wBm_chung_2019
GO:0030256:type I protein secretion system complex	2	6	0.219374	1	2.90188	wBm_chung_2019
GO:0003842:1-pyrroline-5-carboxylate dehydrogenase activity	2	6	0.219374	1	2.90188	wBm_chung_2019
GO:0004590:orotidine-5'-phosphate decarboxylase activity	2	6	0.219374	1	2.90188	wBm_chung_2019
GO:0004748:ribonucleoside-diphosphate reductase activity, thioredoxin disulfide as acceptor	2	6	0.219374	1	2.90188	wBm_chung_2019
GO:0004791:thioredoxin-disulfide reductase activity	2	6	0.219374	1	2.90188	wBm_chung_2019
GO:0008199:ferric iron binding	2	6	0.219374	1	2.90188	wBm_chung_2019
GO:0009014:succinyl-diaminopimelate desuccinylase activity	2	6	0.219374	1	2.90188	wBm_chung_2019
GO:0015299:solute:proton antiporter activity	2	6	0.219374	1	2.90188	wBm_chung_2019
GO:0046429:4-hydroxy-3-methylbut-2-en-1-yl diphosphate synthase activity	2	6	0.219374	1	2.90188	wBm_chung_2019
IPR001750:NADH:quinone oxidoreductase/Mrp antiporter, membrane subunit	5	21	0.220701	1	1.83466	wBm_chung_2019
IPR006171:TOPRIM domain	5	21	0.220701	1	1.83466	wBm_chung_2019
IPR002559:Transposase, IS4-like	1	22	0.228721	1	0.265801	wBm_chung_2019
GO:0003887:DNA-directed DNA polymerase activity	1	22	0.228721	1	0.265801	wBm_chung_2019
GO:0016627:oxidoreductase activity, acting on the CH-CH group of donors	1	22	0.228721	1	0.265801	wBm_chung_2019
GO:0046933:proton-transporting ATP synthase activity, rotational mechanism	1	22	0.228721	1	0.265801	wBm_chung_2019
IPR004839:Aminotransferase, class I/classII	0	12	0.230237	1	0	wBm_chung_2019
IPR005170:Transporter-associated domain	0	12	0.230237	1	0	wBm_chung_2019
IPR010918:AIR synthase-related protein, C-terminal domain	0	12	0.230237	1	0	wBm_chung_2019
IPR016188:PurM-like, N-terminal domain	0	12	0.230237	1	0	wBm_chung_2019
IPR036676:PurM-like, C-terminal domain superfamily	0	12	0.230237	1	0	wBm_chung_2019
IPR036921:PurM-like, N-terminal domain superfamily	0	12	0.230237	1	0	wBm_chung_2019
GO:0004642:phosphoribosylformylglycinamidine synthase activity	0	12	0.230237	1	0	wBm_chung_2019
GO:0009360:DNA polymerase III complex	0	13	0.233595	1	0	wBm_chung_2019
IPR010432:RDD	0	14	0.24297	1	0	wBm_chung_2019
IPR015946:K homology domain-like, alpha/beta	6	26	0.254994	1	1.76778	wBm_chung_2019
IPR000897:Signal recognition particle, SRP54 subunit, GTPase domain	4	15	0.257535	1	2.13068	wBm_chung_2019
IPR009057:Homeobox domain-like	4	15	0.257535	1	2.13068	wBm_chung_2019
IPR013822:Signal recognition particle, SRP54 subunit, helical bundle	4	15	0.257535	1	2.13068	wBm_chung_2019
IPR025948:HTH-like domain	4	15	0.257535	1	2.13068	wBm_chung_2019
IPR039428:NADH-ubiquinone oxidoreductase chain 4L/Mnh complex subunit C1-like	4	15	0.257535	1	2.13068	wBm_chung_2019
IPR042101:Signal recognition particle SRP54, N-terminal domain superfamily	4	15	0.257535	1	2.13068	wBm_chung_2019
GO:0006614:SRP-dependent cotranslational protein targeting to membrane	4	15	0.257535	1	2.13068	wBm_chung_2019
IPR013221:Mur ligase, central	6	27	0.269027	1	1.68057	wBm_chung_2019
IPR036565:Mur-like, catalytic domain superfamily	6	27	0.269027	1	1.68057	wBm_chung_2019
IPR036615:Mur ligase, C-terminal domain superfamily	6	27	0.269027	1	1.68057	wBm_chung_2019
GO:0006633:fatty acid biosynthetic process	9	44	0.273844	1	1.52378	wBm_chung_2019
IPR001969:Aspartic peptidase, active site	1	2	0.275039	1	5.76203	wBm_chung_2019
IPR001995:Peptidase A2A, retrovirus, catalytic	1	2	0.275039	1	5.76203	wBm_chung_2019
IPR002509:NodB homology domain	1	2	0.275039	1	5.76203	wBm_chung_2019
IPR002734:Bacterial bifunctional deaminase-reductase, C-terminal	1	2	0.275039	1	5.76203	wBm_chung_2019
IPR004846:Type II/III secretion system	1	2	0.275039	1	5.76203	wBm_chung_2019
IPR005684:Integration host factor, alpha subunit	1	2	0.275039	1	5.76203	wBm_chung_2019
IPR006074:GTP1/OBG, conserved site	1	2	0.275039	1	5.76203	wBm_chung_2019
IPR007060:Septum formation initiator FtsL/DivIC	1	2	0.275039	1	5.76203	wBm_chung_2019
IPR010934:NADH dehydrogenase subunit 5, C-terminal	1	2	0.275039	1	5.76203	wBm_chung_2019
IPR011330:Glycoside hydrolase/deacetylase, beta/alpha-barrel	1	2	0.275039	1	5.76203	wBm_chung_2019
IPR011969:Clan AA aspartic peptidase, C-terminal	1	2	0.275039	1	5.76203	wBm_chung_2019
IPR011989:Armadillo-like helical	1	2	0.275039	1	5.76203	wBm_chung_2019
IPR013032:EGF-like, conserved site	1	2	0.275039	1	5.76203	wBm_chung_2019
IPR018393:NADH-plastoquinone oxidoreductase, chain 5 subgroup	1	2	0.275039	1	5.76203	wBm_chung_2019
IPR021109:Aspartic peptidase domain	1	2	0.275039	1	5.76203	wBm_chung_2019
IPR023614:Porin domain	1	2	0.275039	1	5.76203	wBm_chung_2019
IPR029510:Aldehyde dehydrogenase, glutamic acid active site	1	2	0.275039	1	5.76203	wBm_chung_2019
IPR034122:Retropepsin-like domain, bacterial	1	2	0.275039	1	5.76203	wBm_chung_2019
IPR036456:Polyribonucleotide nucleotidyltransferase, RNA-binding domain superfamily	1	2	0.275039	1	5.76203	wBm_chung_2019
IPR036781:Smr-associated-like superfamily	1	2	0.275039	1	5.76203	wBm_chung_2019
GO:0008703:5-amino-6-(5-phosphoribosylamino)uracil reductase activity	1	2	0.275039	1	5.76203	wBm_chung_2019
IPR004087:K Homology domain	4	16	0.276499	1	1.94995	wBm_chung_2019
IPR013760:DNA topoisomerase, type IIA-like domain	4	16	0.276499	1	1.94995	wBm_chung_2019
GO:0003918:DNA topoisomerase type II (ATP-hydrolyzing) activity	4	16	0.276499	1	1.94995	wBm_chung_2019
IPR000115:Phosphoribosylglycinamide synthetase	2	7	0.278808	1	2.31859	wBm_chung_2019
IPR000445:Helix-hairpin-helix motif	2	7	0.278808	1	2.31859	wBm_chung_2019
IPR000565:DNA topoisomerase, type IIA, subunit B	2	7	0.278808	1	2.31859	wBm_chung_2019
IPR000672:Tetrahydrofolate dehydrogenase/cyclohydrolase	2	7	0.278808	1	2.31859	wBm_chung_2019
IPR000740:GrpE nucleotide exchange factor	2	7	0.278808	1	2.31859	wBm_chung_2019
IPR000941:Enolase	2	7	0.278808	1	2.31859	wBm_chung_2019
IPR001241:DNA topoisomerase, type IIA	2	7	0.278808	1	2.31859	wBm_chung_2019
IPR001260:Coproporphyrinogen III oxidase, aerobic	2	7	0.278808	1	2.31859	wBm_chung_2019
IPR001310:Histidine triad (HIT) protein	2	7	0.278808	1	2.31859	wBm_chung_2019
IPR001731:Delta-aminolevulinic acid dehydratase	2	7	0.278808	1	2.31859	wBm_chung_2019
IPR001763:Rhodanese-like domain	2	7	0.278808	1	2.31859	wBm_chung_2019
IPR001816:Translation elongation factor EFTs/EF1B	2	7	0.278808	1	2.31859	wBm_chung_2019
IPR001865:Ribosomal protein S2	2	7	0.278808	1	2.31859	wBm_chung_2019
IPR002288:DNA gyrase B subunit, C-terminal	2	7	0.278808	1	2.31859	wBm_chung_2019
IPR002310:Glycine-tRNA ligase, alpha subunit	2	7	0.278808	1	2.31859	wBm_chung_2019
IPR002504:NAD kinase	2	7	0.278808	1	2.31859	wBm_chung_2019
IPR002582:Holo-[acyl carrier protein] synthase	2	7	0.278808	1	2.31859	wBm_chung_2019
IPR003265:HhH-GPD domain	2	7	0.278808	1	2.31859	wBm_chung_2019
IPR003601:DNA topoisomerase, type IA, domain 2	2	7	0.278808	1	2.31859	wBm_chung_2019
IPR003602:DNA topoisomerase, type IA, DNA-binding domain	2	7	0.278808	1	2.31859	wBm_chung_2019
IPR003752:Disulphide bond formation protein DsbB/BdbC	2	7	0.278808	1	2.31859	wBm_chung_2019
IPR004323:Divalent ion tolerance protein, CutA	2	7	0.278808	1	2.31859	wBm_chung_2019
IPR004329:CcmE/CycJ protein	2	7	0.278808	1	2.31859	wBm_chung_2019
IPR004373:Peptide chain release factor 1	2	7	0.278808	1	2.31859	wBm_chung_2019
IPR004394:Protein Iojap/ribosomal silencing factor RsfS	2	7	0.278808	1	2.31859	wBm_chung_2019
IPR004520:tRNA modification GTPase MnmE	2	7	0.278808	1	2.31859	wBm_chung_2019
IPR004568:Phosphopantetheine-protein transferase domain	2	7	0.278808	1	2.31859	wBm_chung_2019
IPR004662:Acetylglutamate kinase	2	7	0.278808	1	2.31859	wBm_chung_2019
IPR005706:Ribosomal protein S2, bacteria/mitochondria/plastid	2	7	0.278808	1	2.31859	wBm_chung_2019
IPR005733:DNA topoisomerase I, bacterial-type	2	7	0.278808	1	2.31859	wBm_chung_2019
IPR005759:Endonuclease III	2	7	0.278808	1	2.31859	wBm_chung_2019
IPR005797:Cytochrome b/b6, N-terminal	2	7	0.278808	1	2.31859	wBm_chung_2019
IPR005798:Cytochrome b/b6, C-terminal	2	7	0.278808	1	2.31859	wBm_chung_2019
IPR005863:UDP-N-acetylmuramoyl-tripeptide--D-alanyl-D-alanine ligase	2	7	0.278808	1	2.31859	wBm_chung_2019
IPR006070:YrdC-like domain	2	7	0.278808	1	2.31859	wBm_chung_2019
IPR007688:Plasmid conjugal transfer TrbL/VirB6	2	7	0.278808	1	2.31859	wBm_chung_2019
IPR008278:4'-phosphopantetheinyl transferase superfamily	2	7	0.278808	1	2.31859	wBm_chung_2019
IPR009009:RlpA-like protein, double-psi beta-barrel domain	2	7	0.278808	1	2.31859	wBm_chung_2019
IPR009012:GrpE nucleotide exchange factor, head	2	7	0.278808	1	2.31859	wBm_chung_2019
IPR009060:UBA-like	2	7	0.278808	1	2.31859	wBm_chung_2019
IPR011146:HIT-like domain	2	7	0.278808	1	2.31859	wBm_chung_2019
IPR011257:DNA glycosylase	2	7	0.278808	1	2.31859	wBm_chung_2019
IPR011284:3-oxoacyl-(acyl-carrier-protein) reductase	2	7	0.278808	1	2.31859	wBm_chung_2019
IPR011322:Nitrogen regulatory PII-like, alpha/beta	2	7	0.278808	1	2.31859	wBm_chung_2019
IPR011557:DNA gyrase, subunit B	2	7	0.278808	1	2.31859	wBm_chung_2019
IPR011566:Ubiquinone biosynthesis protein Coq7	2	7	0.278808	1	2.31859	wBm_chung_2019
IPR011817:Uridylate kinase	2	7	0.278808	1	2.31859	wBm_chung_2019
IPR012997:Rare lipoprotein A	2	7	0.278808	1	2.31859	wBm_chung_2019
IPR013497:DNA topoisomerase, type IA, central	2	7	0.278808	1	2.31859	wBm_chung_2019
IPR013498:DNA topoisomerase, type IA, zn finger	2	7	0.278808	1	2.31859	wBm_chung_2019
IPR013506:DNA topoisomerase, type IIA, subunit B, domain 2	2	7	0.278808	1	2.31859	wBm_chung_2019
IPR013759:DNA topoisomerase, type IIA, central domain	2	7	0.278808	1	2.31859	wBm_chung_2019
IPR013805:GrpE nucleotide exchange factor, coiled-coil	2	7	0.278808	1	2.31859	wBm_chung_2019
IPR013824:DNA topoisomerase, type IA, central region, subdomain 1	2	7	0.278808	1	2.31859	wBm_chung_2019
IPR013825:DNA topoisomerase, type IA, central region, subdomain 2	2	7	0.278808	1	2.31859	wBm_chung_2019
IPR013826:DNA topoisomerase, type IA, central region, subdomain 3	2	7	0.278808	1	2.31859	wBm_chung_2019
IPR014039:Translation elongation factor EFTs/EF1B, dimerisation	2	7	0.278808	1	2.31859	wBm_chung_2019
IPR014358:Enoyl-[acyl-carrier-protein] reductase (NADH)	2	7	0.278808	1	2.31859	wBm_chung_2019
IPR015867:Nitrogen regulatory protein PII/ATP phosphoribosyltransferase, C-terminal	2	7	0.278808	1	2.31859	wBm_chung_2019
IPR015963:Uridylate kinase, bacteria	2	7	0.278808	1	2.31859	wBm_chung_2019
IPR016064:NAD kinase/diacylglycerol kinase-like domain	2	7	0.278808	1	2.31859	wBm_chung_2019
IPR016484:GTP-binding protein EngA	2	7	0.278808	1	2.31859	wBm_chung_2019
IPR017437:ATP-NAD kinase, PpnK-type, all-beta	2	7	0.278808	1	2.31859	wBm_chung_2019
IPR017438:Inorganic polyphosphate/ATP-NAD kinase, domain 1	2	7	0.278808	1	2.31859	wBm_chung_2019
IPR018022:tRNA dimethylallyltransferase	2	7	0.278808	1	2.31859	wBm_chung_2019
IPR018101:Translation elongation factor Ts, conserved site	2	7	0.278808	1	2.31859	wBm_chung_2019
IPR018375:Coproporphyrinogen III oxidase, conserved site	2	7	0.278808	1	2.31859	wBm_chung_2019
IPR018522:DNA topoisomerase, type IIA, conserved site	2	7	0.278808	1	2.31859	wBm_chung_2019
IPR018948:GTP-binding protein TrmE, N-terminal	2	7	0.278808	1	2.31859	wBm_chung_2019
IPR019808:Histidine triad, conserved site	2	7	0.278808	1	2.31859	wBm_chung_2019
IPR019987:GTP-binding protein, ribosome biogenesis, YsxC	2	7	0.278808	1	2.31859	wBm_chung_2019
IPR020559:Phosphoribosylglycinamide synthetase, conserved site	2	7	0.278808	1	2.31859	wBm_chung_2019
IPR020560:Phosphoribosylglycinamide synthetase, C-domain	2	7	0.278808	1	2.31859	wBm_chung_2019
IPR020561:Phosphoribosylglycinamide synthetase, ATP-grasp (A) domain	2	7	0.278808	1	2.31859	wBm_chung_2019
IPR020562:Phosphoribosylglycinamide synthetase, N-terminal	2	7	0.278808	1	2.31859	wBm_chung_2019
IPR020630:Tetrahydrofolate dehydrogenase/cyclohydrolase, catalytic domain	2	7	0.278808	1	2.31859	wBm_chung_2019
IPR020631:Tetrahydrofolate dehydrogenase/cyclohydrolase, NAD(P)-binding domain	2	7	0.278808	1	2.31859	wBm_chung_2019
IPR020809:Enolase, conserved site	2	7	0.278808	1	2.31859	wBm_chung_2019
IPR020810:Enolase, C-terminal TIM barrel domain	2	7	0.278808	1	2.31859	wBm_chung_2019
IPR020811:Enolase, N-terminal	2	7	0.278808	1	2.31859	wBm_chung_2019
IPR020867:Tetrahydrofolate dehydrogenase/cyclohydrolase, conserved site	2	7	0.278808	1	2.31859	wBm_chung_2019
IPR020936:Uncharacterised protein family UPF0176	2	7	0.278808	1	2.31859	wBm_chung_2019
IPR023170:Helix-turn-helix, base-excision DNA repair, C-terminal	2	7	0.278808	1	2.31859	wBm_chung_2019
IPR023380:Disulphide bond formation protein DsbB-like domain	2	7	0.278808	1	2.31859	wBm_chung_2019
IPR023405:DNA topoisomerase, type IA, core domain	2	7	0.278808	1	2.31859	wBm_chung_2019
IPR023406:DNA topoisomerase, type IA, active site	2	7	0.278808	1	2.31859	wBm_chung_2019
IPR023591:Ribosomal protein S2, flavodoxin-like domain	2	7	0.278808	1	2.31859	wBm_chung_2019
IPR025589:Topoisomerase C-terminal repeat	2	7	0.278808	1	2.31859	wBm_chung_2019
IPR025867:MnmE, helical domain	2	7	0.278808	1	2.31859	wBm_chung_2019
IPR027368:tRNA modification GTPase MnmE domain 2	2	7	0.278808	1	2.31859	wBm_chung_2019
IPR027387:Cytochrome b/b6-like domain	2	7	0.278808	1	2.31859	wBm_chung_2019
IPR028612:DNA topoisomerase I, type IA	2	7	0.278808	1	2.31859	wBm_chung_2019
IPR029017:Enolase N-terminal domain-like	2	7	0.278808	1	2.31859	wBm_chung_2019
IPR030393:EngB-type guanine nucleotide-binding (G) domain	2	7	0.278808	1	2.31859	wBm_chung_2019
IPR030656:Delta-aminolevulinic acid dehydratase, active site	2	7	0.278808	1	2.31859	wBm_chung_2019
IPR030689:Cytochrome b	2	7	0.278808	1	2.31859	wBm_chung_2019
IPR031166:EngA-type guanine nucleotide-binding (G) domain	2	7	0.278808	1	2.31859	wBm_chung_2019
IPR031168:TrmE-type guanine nucleotide-binding domain	2	7	0.278808	1	2.31859	wBm_chung_2019
IPR032859:GTPase Der, C-terminal KH-domain-like	2	7	0.278808	1	2.31859	wBm_chung_2019
IPR034149:DNA topoisomerase 1, TOPRIM domain	2	7	0.278808	1	2.31859	wBm_chung_2019
IPR034160:DNA gyrase subunit B, TOPRIM domain	2	7	0.278808	1	2.31859	wBm_chung_2019
IPR034718:Endolytic peptidoglycan transglycosylase RlpA	2	7	0.278808	1	2.31859	wBm_chung_2019
IPR036127:CcmE-like superfamily	2	7	0.278808	1	2.31859	wBm_chung_2019
IPR036150:Cytochrome b/b6, C-terminal domain superfamily	2	7	0.278808	1	2.31859	wBm_chung_2019
IPR036265:HIT-like superfamily	2	7	0.278808	1	2.31859	wBm_chung_2019
IPR036402:Elongation factor Ts, dimerisation domain superfamily	2	7	0.278808	1	2.31859	wBm_chung_2019
IPR036406:Oxygen-dependent coproporphyrinogen III oxidase superfamily	2	7	0.278808	1	2.31859	wBm_chung_2019
IPR036849:Enolase-like, C-terminal domain superfamily	2	7	0.278808	1	2.31859	wBm_chung_2019
IPR036873:Rhodanese-like domain superfamily	2	7	0.278808	1	2.31859	wBm_chung_2019
IPR036908:RlpA-like domain superfamily	2	7	0.278808	1	2.31859	wBm_chung_2019
IPR037123:Phosphoribosylglycinamide synthetase, C-domain superfamily	2	7	0.278808	1	2.31859	wBm_chung_2019
IPR037143:4'-phosphopantetheinyl transferase domain superfamily	2	7	0.278808	1	2.31859	wBm_chung_2019
IPR040503:UPF0176, acylphosphatase-like domain	2	7	0.278808	1	2.31859	wBm_chung_2019
GO:0006122:mitochondrial electron transport, ubiquinol to cytochrome c	2	7	0.278808	1	2.31859	wBm_chung_2019
GO:0006741:NADP biosynthetic process	2	7	0.278808	1	2.31859	wBm_chung_2019
GO:0010038:response to metal ion	2	7	0.278808	1	2.31859	wBm_chung_2019
GO:0017003:protein-heme linkage	2	7	0.278808	1	2.31859	wBm_chung_2019
GO:0019674:NAD metabolic process	2	7	0.278808	1	2.31859	wBm_chung_2019
GO:0071555:cell wall organization	2	7	0.278808	1	2.31859	wBm_chung_2019
GO:0000015:phosphopyruvate hydratase complex	2	7	0.278808	1	2.31859	wBm_chung_2019
GO:0045275:respiratory chain complex III	2	7	0.278808	1	2.31859	wBm_chung_2019
GO:0000774:adenyl-nucleotide exchange factor activity	2	7	0.278808	1	2.31859	wBm_chung_2019
GO:0003725:double-stranded RNA binding	2	7	0.278808	1	2.31859	wBm_chung_2019
GO:0003917:DNA topoisomerase type I activity	2	7	0.278808	1	2.31859	wBm_chung_2019
GO:0003951:NAD+ kinase activity	2	7	0.278808	1	2.31859	wBm_chung_2019
GO:0004109:coproporphyrinogen oxidase activity	2	7	0.278808	1	2.31859	wBm_chung_2019
GO:0004316:3-oxoacyl-[acyl-carrier-protein] reductase (NADPH) activity	2	7	0.278808	1	2.31859	wBm_chung_2019
GO:0004318:enoyl-[acyl-carrier-protein] reductase (NADH) activity	2	7	0.278808	1	2.31859	wBm_chung_2019
GO:0004488:methylenetetrahydrofolate dehydrogenase (NADP+) activity	2	7	0.278808	1	2.31859	wBm_chung_2019
GO:0004634:phosphopyruvate hydratase activity	2	7	0.278808	1	2.31859	wBm_chung_2019
GO:0004637:phosphoribosylamine-glycine ligase activity	2	7	0.278808	1	2.31859	wBm_chung_2019
GO:0004655:porphobilinogen synthase activity	2	7	0.278808	1	2.31859	wBm_chung_2019
GO:0008897:holo-[acyl-carrier-protein] synthase activity	2	7	0.278808	1	2.31859	wBm_chung_2019
GO:0009041:uridylate kinase activity	2	7	0.278808	1	2.31859	wBm_chung_2019
GO:0033862:UMP kinase activity	2	7	0.278808	1	2.31859	wBm_chung_2019
GO:0042803:protein homodimerization activity	2	7	0.278808	1	2.31859	wBm_chung_2019
GO:0047480:UDP-N-acetylmuramoyl-tripeptide-D-alanyl-D-alanine ligase activity	2	7	0.278808	1	2.31859	wBm_chung_2019
GO:0051087:chaperone binding	2	7	0.278808	1	2.31859	wBm_chung_2019
GO:0006099:tricarboxylic acid cycle	4	46	0.284424	1	0.526867	wBm_chung_2019
GO:0050660:flavin adenine dinucleotide binding	4	47	0.28544	1	0.513605	wBm_chung_2019
GO:0043039:tRNA aminoacylation	6	28	0.285461	1	1.60128	wBm_chung_2019
GO:0016620:oxidoreductase activity, acting on the aldehyde or oxo group of donors, NAD or NADP as acceptor	4	17	0.299112	1	1.79683	wBm_chung_2019
GO:0051539:4 iron, 4 sulfur cluster binding	7	32	0.302628	1	1.65302	wBm_chung_2019
IPR006195:Aminoacyl-tRNA synthetase, class II	7	34	0.323315	1	1.52495	wBm_chung_2019
IPR036291:NAD(P)-binding domain superfamily	15	82	0.323436	1	1.33703	wBm_chung_2019
GO:0006284:base-excision repair	4	18	0.324674	1	1.66562	wBm_chung_2019
GO:0042773:ATP synthesis coupled electron transport	4	18	0.324674	1	1.66562	wBm_chung_2019
IPR002510:Metalloprotease TldD/PmbA	1	19	0.335837	1	0.311845	wBm_chung_2019
IPR036059:Metalloprotease TldD/PmbA superfamily	1	19	0.335837	1	0.311845	wBm_chung_2019
GO:0008237:metallopeptidase activity	1	19	0.335837	1	0.311845	wBm_chung_2019
GO:0016887:ATPase activity	11	58	0.336693	1	1.38676	wBm_chung_2019
IPR000644:CBS domain	1	20	0.33754	1	0.294883	wBm_chung_2019
IPR019489:Clp ATPase, C-terminal	1	20	0.33754	1	0.294883	wBm_chung_2019
IPR020103:Pseudouridine synthase, catalytic domain	1	20	0.33754	1	0.294883	wBm_chung_2019
GO:0001522:pseudouridine synthesis	1	20	0.33754	1	0.294883	wBm_chung_2019
GO:0009451:RNA modification	1	20	0.33754	1	0.294883	wBm_chung_2019
GO:0009982:pseudouridine synthase activity	1	20	0.33754	1	0.294883	wBm_chung_2019
IPR000235:Ribosomal protein S5/S7	2	8	0.33796	1	1.92955	wBm_chung_2019
IPR000440:NADH:ubiquinone/plastoquinone oxidoreductase, chain 3	2	8	0.33796	1	1.92955	wBm_chung_2019
IPR001236:Lactate/malate dehydrogenase, N-terminal	2	8	0.33796	1	1.92955	wBm_chung_2019
IPR001268:NADH:ubiquinone oxidoreductase, 30kDa subunit	2	8	0.33796	1	1.92955	wBm_chung_2019
IPR001557:L-lactate/malate dehydrogenase	2	8	0.33796	1	1.92955	wBm_chung_2019
IPR001674:GMP synthase, C-terminal	2	8	0.33796	1	1.92955	wBm_chung_2019
IPR001949:NADH:ubiquinone oxidoreductase, 51kDa subunit, conserved site	2	8	0.33796	1	1.92955	wBm_chung_2019
IPR002306:Tryptophan-tRNA ligase	2	8	0.33796	1	1.92955	wBm_chung_2019
IPR004739:GMP synthase, glutamine amidotransferase	2	8	0.33796	1	1.92955	wBm_chung_2019
IPR005679:Ribosomal protein S12, bacterial-type	2	8	0.33796	1	1.92955	wBm_chung_2019
IPR005717:Ribosomal protein S7, bacterial/organellar-type	2	8	0.33796	1	1.92955	wBm_chung_2019
IPR005805:Rieske iron-sulphur protein, C-terminal	2	8	0.33796	1	1.92955	wBm_chung_2019
IPR006032:Ribosomal protein S12/S23	2	8	0.33796	1	1.92955	wBm_chung_2019
IPR006137:NADH:ubiquinone oxidoreductase-like, 20kDa subunit	2	8	0.33796	1	1.92955	wBm_chung_2019
IPR006138:NADH-ubiquinone oxidoreductase, 20 Kd subunit	2	8	0.33796	1	1.92955	wBm_chung_2019
IPR006194:Glycine-tRNA synthetase, heterodimeric	2	8	0.33796	1	1.92955	wBm_chung_2019
IPR006257:Dihydrolipoyllysine-residue acetyltransferase component of pyruvate dehydrogenase complex	2	8	0.33796	1	1.92955	wBm_chung_2019
IPR006273:Orotate phosphoribosyltransferase, bacterial	2	8	0.33796	1	1.92955	wBm_chung_2019
IPR006317:Ubiquinol-cytochrome c reductase, iron-sulphur subunit	2	8	0.33796	1	1.92955	wBm_chung_2019
IPR010129:Type I secretion membrane fusion protein, HlyD family	2	8	0.33796	1	1.92955	wBm_chung_2019
IPR010201:HflK	2	8	0.33796	1	1.92955	wBm_chung_2019
IPR010218:NADH dehydrogenase, subunit C	2	8	0.33796	1	1.92955	wBm_chung_2019
IPR010226:NADH-quinone oxidoreductase, chain I	2	8	0.33796	1	1.92955	wBm_chung_2019
IPR011275:Malate dehydrogenase, type 3	2	8	0.33796	1	1.92955	wBm_chung_2019
IPR011537:NADH ubiquinone oxidoreductase, F subunit	2	8	0.33796	1	1.92955	wBm_chung_2019
IPR011538:NADH-ubiquinone oxidoreductase 51 kDa subunit, FMN-binding domain	2	8	0.33796	1	1.92955	wBm_chung_2019
IPR014014:RNA helicase, DEAD-box type, Q motif	2	8	0.33796	1	1.92955	wBm_chung_2019
IPR015955:Lactate dehydrogenase/glycoside hydrolase, family 4, C-terminal	2	8	0.33796	1	1.92955	wBm_chung_2019
IPR017941:Rieske [2Fe-2S] iron-sulphur domain	2	8	0.33796	1	1.92955	wBm_chung_2019
IPR019470:Ubiquitinol-cytochrome C reductase, Fe-S subunit, TAT signal	2	8	0.33796	1	1.92955	wBm_chung_2019
IPR019554:Soluble ligand binding domain	2	8	0.33796	1	1.92955	wBm_chung_2019
IPR019575:NADH-ubiquinone oxidoreductase 51 kDa subunit, iron-sulphur binding domain	2	8	0.33796	1	1.92955	wBm_chung_2019
IPR020396:NADH:ubiquinone oxidoreductase, 30kDa subunit, conserved site	2	8	0.33796	1	1.92955	wBm_chung_2019
IPR020606:Ribosomal protein S7, conserved site	2	8	0.33796	1	1.92955	wBm_chung_2019
IPR022383:Lactate/malate dehydrogenase, C-terminal	2	8	0.33796	1	1.92955	wBm_chung_2019
IPR023031:Orotate phosphoribosyltransferase	2	8	0.33796	1	1.92955	wBm_chung_2019
IPR023043:NAD(P)H-quinone oxidoreductase subunit 3, bacterial/plastid	2	8	0.33796	1	1.92955	wBm_chung_2019
IPR023798:Ribosomal protein S7 domain	2	8	0.33796	1	1.92955	wBm_chung_2019
IPR024109:Tryptophan-tRNA ligase, bacterial-type	2	8	0.33796	1	1.92955	wBm_chung_2019
IPR025777:GMP synthetase ATP pyrophosphatase domain	2	8	0.33796	1	1.92955	wBm_chung_2019
IPR036823:Ribosomal protein S7 domain superfamily	2	8	0.33796	1	1.92955	wBm_chung_2019
IPR036922:Rieske [2Fe-2S] iron-sulphur domain superfamily	2	8	0.33796	1	1.92955	wBm_chung_2019
IPR037207:NADH-ubiquinone oxidoreductase 51kDa subunit, iron-sulphur binding domain superfamily	2	8	0.33796	1	1.92955	wBm_chung_2019
IPR037225:NADH-ubiquinone oxidoreductase 51kDa subunit, FMN-binding domain superfamily	2	8	0.33796	1	1.92955	wBm_chung_2019
IPR037232:NADH:ubiquinone oxidoreductase, 30kDa subunit superfamily	2	8	0.33796	1	1.92955	wBm_chung_2019
IPR038430:NADH:ubiquinone oxidoreductase, subunit 3 superfamily	2	8	0.33796	1	1.92955	wBm_chung_2019
GO:0006177:GMP biosynthetic process	2	8	0.33796	1	1.92955	wBm_chung_2019
GO:0006426:glycyl-tRNA aminoacylation	2	8	0.33796	1	1.92955	wBm_chung_2019
GO:0006436:tryptophanyl-tRNA aminoacylation	2	8	0.33796	1	1.92955	wBm_chung_2019
GO:0019752:carboxylic acid metabolic process	2	8	0.33796	1	1.92955	wBm_chung_2019
GO:0019856:pyrimidine nucleobase biosynthetic process	2	8	0.33796	1	1.92955	wBm_chung_2019
GO:0045254:pyruvate dehydrogenase complex	2	8	0.33796	1	1.92955	wBm_chung_2019
GO:0003922:GMP synthase (glutamine-hydrolyzing) activity	2	8	0.33796	1	1.92955	wBm_chung_2019
GO:0004588:orotate phosphoribosyltransferase activity	2	8	0.33796	1	1.92955	wBm_chung_2019
GO:0004742:dihydrolipoyllysine-residue acetyltransferase activity	2	8	0.33796	1	1.92955	wBm_chung_2019
GO:0004820:glycine-tRNA ligase activity	2	8	0.33796	1	1.92955	wBm_chung_2019
GO:0004830:tryptophan-tRNA ligase activity	2	8	0.33796	1	1.92955	wBm_chung_2019
GO:0016462:pyrophosphatase activity	2	8	0.33796	1	1.92955	wBm_chung_2019
IPR036388:Winged helix-like DNA-binding domain superfamily	3	36	0.338583	1	0.506368	wBm_chung_2019
GO:0008168:methyltransferase activity	3	37	0.339806	1	0.49053	wBm_chung_2019
GO:0045261:proton-transporting ATP synthase complex, catalytic core F(1)	1	21	0.343416	1	0.279615	wBm_chung_2019
IPR001650:Helicase, C-terminal	5	23	0.365952	1	1.6251	wBm_chung_2019
IPR014001:Helicase superfamily 1/2, ATP-binding domain	5	23	0.365952	1	1.6251	wBm_chung_2019
GO:0006413:translational initiation	5	23	0.365952	1	1.6251	wBm_chung_2019
GO:0003743:translation initiation factor activity	5	23	0.365952	1	1.6251	wBm_chung_2019
IPR001015:Ferrochelatase	0	9	0.369326	1	0	wBm_chung_2019
IPR001075:NIF system FeS cluster assembly, NifU, C-terminal	0	9	0.369326	1	0	wBm_chung_2019
IPR001270:ClpA/B family	0	9	0.369326	1	0	wBm_chung_2019
IPR001684:Ribosomal protein L27	0	9	0.369326	1	0	wBm_chung_2019
IPR004516:Histidine-tRNA ligase/ATP phosphoribosyltransferase regulatory subunit	0	9	0.369326	1	0	wBm_chung_2019
IPR006145:Pseudouridine synthase, RsuA/RluB/C/D/E/F	0	9	0.369326	1	0	wBm_chung_2019
IPR006224:Pseudouridine synthase, RluC/RluD, conserved site	0	9	0.369326	1	0	wBm_chung_2019
IPR008927:6-phosphogluconate dehydrogenase C-terminal domain-like	0	9	0.369326	1	0	wBm_chung_2019
IPR014824:Scaffold protein Nfu/NifU, N-terminal	0	9	0.369326	1	0	wBm_chung_2019
IPR015807:Histidine-tRNA ligase	0	9	0.369326	1	0	wBm_chung_2019
IPR018261:Ribosomal protein L27, conserved site	0	9	0.369326	1	0	wBm_chung_2019
IPR018368:ClpA/B, conserved site 1	0	9	0.369326	1	0	wBm_chung_2019
IPR019772:Ferrochelatase, active site	0	9	0.369326	1	0	wBm_chung_2019
IPR028299:ClpA/B, conserved site 2	0	9	0.369326	1	0	wBm_chung_2019
IPR033644:Ferrochelatase, C-terminal	0	9	0.369326	1	0	wBm_chung_2019
IPR033659:Ferrochelatase, N-terminal	0	9	0.369326	1	0	wBm_chung_2019
IPR035433:NFU1-like	0	9	0.369326	1	0	wBm_chung_2019
IPR036498:Scaffold protein Nfu/NifU, N-terminal domain superfamily	0	9	0.369326	1	0	wBm_chung_2019
IPR036628:Clp, N-terminal domain superfamily	0	9	0.369326	1	0	wBm_chung_2019
IPR038765:Papain-like cysteine peptidase superfamily	0	9	0.369326	1	0	wBm_chung_2019
IPR041546:ClpA/ClpB, AAA lid domain	0	9	0.369326	1	0	wBm_chung_2019
IPR041715:Class II Histidinyl-tRNA synthetase (HisRS)-like catalytic core domain	0	9	0.369326	1	0	wBm_chung_2019
GO:0006427:histidyl-tRNA aminoacylation	0	9	0.369326	1	0	wBm_chung_2019
GO:0006783:heme biosynthetic process	0	9	0.369326	1	0	wBm_chung_2019
GO:0004325:ferrochelatase activity	0	9	0.369326	1	0	wBm_chung_2019
GO:0004821:histidine-tRNA ligase activity	0	9	0.369326	1	0	wBm_chung_2019
IPR000131:ATP synthase, F1 complex, gamma subunit	0	10	0.372462	1	0	wBm_chung_2019
IPR000701:Succinate dehydrogenase/Fumarate reductase, transmembrane subunit	0	10	0.372462	1	0	wBm_chung_2019
IPR002059:Cold-shock protein, DNA-binding	0	10	0.372462	1	0	wBm_chung_2019
IPR012156:Cold shock, CspA	0	10	0.372462	1	0	wBm_chung_2019
IPR019844:Cold-shock conserved site	0	10	0.372462	1	0	wBm_chung_2019
IPR032712:AsmA-like, C-terminal	0	10	0.372462	1	0	wBm_chung_2019
IPR034804:Fumarate reductase/succinate dehydrogenase, transmembrane subunit	0	10	0.372462	1	0	wBm_chung_2019
IPR035068:Metalloprotease TldD/PmbA, N-terminal	0	10	0.372462	1	0	wBm_chung_2019
IPR035968:ATP synthase, F1 complex, gamma subunit superfamily	0	10	0.372462	1	0	wBm_chung_2019
GO:0045263:proton-transporting ATP synthase complex, coupling factor F(o)	0	10	0.372462	1	0	wBm_chung_2019
GO:0000104:succinate dehydrogenase activity	0	10	0.372462	1	0	wBm_chung_2019
GO:0015078:hydrogen ion transmembrane transporter activity	0	10	0.372462	1	0	wBm_chung_2019
IPR036188:FAD/NAD(P)-binding domain superfamily	4	42	0.377883	1	0.586886	wBm_chung_2019
IPR036397:Ribonuclease H superfamily	4	42	0.377883	1	0.586886	wBm_chung_2019
GO:0006281:DNA repair	4	45	0.381782	1	0.540775	wBm_chung_2019
IPR001087:GDSL lipase/esterase	1	3	0.382988	1	2.88166	wBm_chung_2019
IPR001645:Folylpolyglutamate synthetase	1	3	0.382988	1	2.88166	wBm_chung_2019
IPR001737:Ribosomal RNA adenine methyltransferase KsgA/Erm	1	3	0.382988	1	2.88166	wBm_chung_2019
IPR002295:N6 adenine-specific DNA methyltransferase, D21 class	1	3	0.382988	1	2.88166	wBm_chung_2019
IPR002302:Leucine-tRNA ligase	1	3	0.382988	1	2.88166	wBm_chung_2019
IPR002525:Transposase, IS111A/IS1328/IS1533, N-terminal	1	3	0.382988	1	2.88166	wBm_chung_2019
IPR002744:Domain of unknown function DUF59	1	3	0.382988	1	2.88166	wBm_chung_2019
IPR002941:DNA methylase N-4/N-6	1	3	0.382988	1	2.88166	wBm_chung_2019
IPR003323:OTU domain	1	3	0.382988	1	2.88166	wBm_chung_2019
IPR003358:tRNA (guanine-N-7) methyltransferase, Trmb type	1	3	0.382988	1	2.88166	wBm_chung_2019
IPR005829:Sugar transporter, conserved site	1	3	0.382988	1	2.88166	wBm_chung_2019
IPR005990:Inosine-5'-monophosphate dehydrogenase	1	3	0.382988	1	2.88166	wBm_chung_2019
IPR007792:Type IV secretion system, VirB3 / TrbD / AvhB	1	3	0.382988	1	2.88166	wBm_chung_2019
IPR011109:DNA-binding recombinase domain	1	3	0.382988	1	2.88166	wBm_chung_2019
IPR011528:Nuclease-related domain, NERD	1	3	0.382988	1	2.88166	wBm_chung_2019
IPR011530:Ribosomal RNA adenine dimethylase	1	3	0.382988	1	2.88166	wBm_chung_2019
IPR012762:Ubiquinone biosynthesis protein COQ9	1	3	0.382988	1	2.88166	wBm_chung_2019
IPR013718:COQ9	1	3	0.382988	1	2.88166	wBm_chung_2019
IPR015840:DNA methyase, ParB domain-containing	1	3	0.382988	1	2.88166	wBm_chung_2019
IPR015944:Glycine-tRNA ligase, beta subunit	1	3	0.382988	1	2.88166	wBm_chung_2019
IPR019546:Twin-arginine translocation pathway, signal sequence, bacterial/archaeal	1	3	0.382988	1	2.88166	wBm_chung_2019
IPR020596:Ribosomal RNA adenine methylase transferase, conserved site	1	3	0.382988	1	2.88166	wBm_chung_2019
IPR020598:Ribosomal RNA adenine methylase transferase, N-terminal	1	3	0.382988	1	2.88166	wBm_chung_2019
IPR023165:rRNA adenine dimethylase-like	1	3	0.382988	1	2.88166	wBm_chung_2019
IPR025709:Leucyl-tRNA synthetase, editing domain	1	3	0.382988	1	2.88166	wBm_chung_2019
IPR034964:Lumazine synthase	1	3	0.382988	1	2.88166	wBm_chung_2019
IPR036514:SGNH hydrolase superfamily	1	3	0.382988	1	2.88166	wBm_chung_2019
GO:0000154:rRNA modification	1	3	0.382988	1	2.88166	wBm_chung_2019
GO:0006306:DNA methylation	1	3	0.382988	1	2.88166	wBm_chung_2019
GO:0006429:leucyl-tRNA aminoacylation	1	3	0.382988	1	2.88166	wBm_chung_2019
GO:0005743:mitochondrial inner membrane	1	3	0.382988	1	2.88166	wBm_chung_2019
GO:0000150:recombinase activity	1	3	0.382988	1	2.88166	wBm_chung_2019
GO:0000179:rRNA (adenine-N6,N6-)-dimethyltransferase activity	1	3	0.382988	1	2.88166	wBm_chung_2019
GO:0000906:6,7-dimethyl-8-ribityllumazine synthase activity	1	3	0.382988	1	2.88166	wBm_chung_2019
GO:0003938:IMP dehydrogenase activity	1	3	0.382988	1	2.88166	wBm_chung_2019
GO:0004823:leucine-tRNA ligase activity	1	3	0.382988	1	2.88166	wBm_chung_2019
GO:0008170:N-methyltransferase activity	1	3	0.382988	1	2.88166	wBm_chung_2019
GO:0008176:tRNA (guanine-N7-)-methyltransferase activity	1	3	0.382988	1	2.88166	wBm_chung_2019
GO:0008289:lipid binding	1	3	0.382988	1	2.88166	wBm_chung_2019
GO:0008649:rRNA methyltransferase activity	1	3	0.382988	1	2.88166	wBm_chung_2019
IPR001100:Pyridine nucleotide-disulphide oxidoreductase, class I	0	11	0.383414	1	0	wBm_chung_2019
IPR004099:Pyridine nucleotide-disulphide oxidoreductase, dimerisation domain	0	11	0.383414	1	0	wBm_chung_2019
IPR006258:Dihydrolipoamide dehydrogenase	0	11	0.383414	1	0	wBm_chung_2019
IPR012999:Pyridine nucleotide-disulphide oxidoreductase, class I, active site	0	11	0.383414	1	0	wBm_chung_2019
IPR014016:UvrD-like helicase, ATP-binding domain	0	11	0.383414	1	0	wBm_chung_2019
IPR014017:UvrD-like DNA helicase, C-terminal	0	11	0.383414	1	0	wBm_chung_2019
IPR016156:FAD/NAD-linked reductase, dimerisation domain	0	11	0.383414	1	0	wBm_chung_2019
IPR032710:NTF2-like domain	0	11	0.383414	1	0	wBm_chung_2019
IPR034739:UvrD/AddA helicase, N-terminal	0	11	0.383414	1	0	wBm_chung_2019
IPR038726:PD-(D/E)XK endonuclease-like domain, AddAB-type	0	11	0.383414	1	0	wBm_chung_2019
GO:0035435:phosphate ion transmembrane transport	0	11	0.383414	1	0	wBm_chung_2019
GO:0004148:dihydrolipoyl dehydrogenase activity	0	11	0.383414	1	0	wBm_chung_2019
GO:0016668:oxidoreductase activity, acting on a sulfur group of donors, NAD(P) as acceptor	0	11	0.383414	1	0	wBm_chung_2019
GO:0051287:NAD binding	9	47	0.393901	1	1.39546	wBm_chung_2019
IPR012675:Beta-grasp domain	5	25	0.399941	1	1.45736	wBm_chung_2019
GO:0008299:isoprenoid biosynthetic process	5	25	0.399941	1	1.45736	wBm_chung_2019
GO:0016765:transferase activity, transferring alkyl or aryl (other than methyl) groups	5	25	0.399941	1	1.45736	wBm_chung_2019
IPR002541:Cytochrome c assembly protein	3	12	0.400604	1	1.93964	wBm_chung_2019
IPR004044:K Homology domain, type 2	3	12	0.400604	1	1.93964	wBm_chung_2019
IPR027266:GTP-binding protein TrmE/Glycine cleavage system T protein, domain 1	3	12	0.400604	1	1.93964	wBm_chung_2019
IPR041095:Elongation Factor G, domain II	3	12	0.400604	1	1.93964	wBm_chung_2019
GO:0003906:DNA-(apurinic or apyrimidinic site) lyase activity	3	12	0.400604	1	1.93964	wBm_chung_2019
GO:0010181:FMN binding	3	12	0.400604	1	1.93964	wBm_chung_2019
GO:0006508:proteolysis	9	81	0.402884	1	0.687876	wBm_chung_2019
IPR023753:FAD/NAD(P)-binding domain	2	28	0.410993	1	0.429705	wBm_chung_2019
GO:0006310:DNA recombination	2	28	0.410993	1	0.429705	wBm_chung_2019
GO:0017004:cytochrome complex assembly	6	29	0.418342	1	1.52888	wBm_chung_2019
IPR000352:Peptide chain release factor class I/class II	3	13	0.422627	1	1.74275	wBm_chung_2019
IPR005139:Peptide chain release factor	3	13	0.422627	1	1.74275	wBm_chung_2019
IPR006638:Elongator protein 3/MiaB/NifB	3	13	0.422627	1	1.74275	wBm_chung_2019
IPR011527:ABC transporter type 1, transmembrane domain	3	13	0.422627	1	1.74275	wBm_chung_2019
IPR012676:TGS-like	3	13	0.422627	1	1.74275	wBm_chung_2019
IPR031167:OBG-type guanine nucleotide-binding (G) domain	3	13	0.422627	1	1.74275	wBm_chung_2019
IPR036640:ABC transporter type 1, transmembrane domain superfamily	3	13	0.422627	1	1.74275	wBm_chung_2019
GO:0006415:translational termination	3	13	0.422627	1	1.74275	wBm_chung_2019
GO:0003747:translation release factor activity	3	13	0.422627	1	1.74275	wBm_chung_2019
GO:0003916:DNA topoisomerase activity	3	13	0.422627	1	1.74275	wBm_chung_2019
GO:0016149:translation release factor activity, codon specific	3	13	0.422627	1	1.74275	wBm_chung_2019
GO:0009306:protein secretion	3	14	0.448255	1	1.58168	wBm_chung_2019
GO:0044237:cellular metabolic process	3	14	0.448255	1	1.58168	wBm_chung_2019
GO:0051082:unfolded protein binding	3	34	0.456468	1	0.541104	wBm_chung_2019
GO:0009089:lysine biosynthetic process via diaminopimelate	7	36	0.466433	1	1.4145	wBm_chung_2019
IPR005225:Small GTP-binding protein domain	7	37	0.474514	1	1.3648	wBm_chung_2019
GO:0016651:oxidoreductase activity, acting on NAD(P)H	7	37	0.474514	1	1.3648	wBm_chung_2019
IPR000093:DNA recombination protein RecR	1	4	0.475007	1	1.91945	wBm_chung_2019
IPR000100:Ribonuclease P	1	4	0.475007	1	1.91945	wBm_chung_2019
IPR000291:D-alanine--D-alanine ligase/VANA/B/C, conserved site	1	4	0.475007	1	1.91945	wBm_chung_2019
IPR000422:3,4-dihydroxy-2-butanone 4-phosphate synthase, RibB	1	4	0.475007	1	1.91945	wBm_chung_2019
IPR000813:7Fe ferredoxin	1	4	0.475007	1	1.91945	wBm_chung_2019
IPR001093:IMP dehydrogenase/GMP reductase	1	4	0.475007	1	1.91945	wBm_chung_2019
IPR001133:NADH-ubiquinone oxidoreductase chain 4L/K	1	4	0.475007	1	1.91945	wBm_chung_2019
IPR001694:NADH:ubiquinone oxidoreductase, subunit 1/F420H2 oxidoreductase subunit H	1	4	0.475007	1	1.91945	wBm_chung_2019
IPR002904:Lysine-tRNA ligase	1	4	0.475007	1	1.91945	wBm_chung_2019
IPR003141:Polymerase/histidinol phosphatase, N-terminal	1	4	0.475007	1	1.91945	wBm_chung_2019
IPR003837:Glu-tRNAGln amidotransferase C subunit	1	4	0.475007	1	1.91945	wBm_chung_2019
IPR003960:ATPase, AAA-type, conserved site	1	4	0.475007	1	1.91945	wBm_chung_2019
IPR004013:PHP domain	1	4	0.475007	1	1.91945	wBm_chung_2019
IPR004195:Head decoration protein D	1	4	0.475007	1	1.91945	wBm_chung_2019
IPR004665:Transcription termination factor Rho	1	4	0.475007	1	1.91945	wBm_chung_2019
IPR004731:Transaldolase type 3B/Fructose-6-phosphate aldolase	1	4	0.475007	1	1.91945	wBm_chung_2019
IPR004805:DNA polymerase III, alpha subunit	1	4	0.475007	1	1.91945	wBm_chung_2019
IPR005905:D-alanine--D-alanine ligase	1	4	0.475007	1	1.91945	wBm_chung_2019
IPR006369:Protohaem IX farnesyltransferase	1	4	0.475007	1	1.91945	wBm_chung_2019
IPR007048:GpW/Gp25/anti-adapter protein IraD	1	4	0.475007	1	1.91945	wBm_chung_2019
IPR008144:Guanylate kinase-like domain	1	4	0.475007	1	1.91945	wBm_chung_2019
IPR008145:Guanylate kinase/L-type calcium channel beta subunit	1	4	0.475007	1	1.91945	wBm_chung_2019
IPR008727:PAAR motif	1	4	0.475007	1	1.91945	wBm_chung_2019
IPR010421:Protein of unknown function DUF1013	1	4	0.475007	1	1.91945	wBm_chung_2019
IPR011095:D-alanine--D-alanine ligase, C-terminal	1	4	0.475007	1	1.91945	wBm_chung_2019
IPR011112:Rho termination factor, N-terminal	1	4	0.475007	1	1.91945	wBm_chung_2019
IPR011113:Rho termination factor, RNA-binding domain	1	4	0.475007	1	1.91945	wBm_chung_2019
IPR011127:D-alanine--D-alanine ligase, N-terminal domain	1	4	0.475007	1	1.91945	wBm_chung_2019
IPR011708:Bacterial DNA polymerase III, alpha subunit	1	4	0.475007	1	1.91945	wBm_chung_2019
IPR015875:IMP dehydrogenase / GMP reductase, conserved site	1	4	0.475007	1	1.91945	wBm_chung_2019
IPR015911:Phosphoglycerate kinase, conserved site	1	4	0.475007	1	1.91945	wBm_chung_2019
IPR015967:Recombination protein RecR, conserved site	1	4	0.475007	1	1.91945	wBm_chung_2019
IPR016195:Polymerase/histidinol phosphatase-like	1	4	0.475007	1	1.91945	wBm_chung_2019
IPR017665:Guanylate kinase	1	4	0.475007	1	1.91945	wBm_chung_2019
IPR018086:NADH:ubiquinone oxidoreductase, subunit 1, conserved site	1	4	0.475007	1	1.91945	wBm_chung_2019
IPR020539:Ribonuclease P, conserved site	1	4	0.475007	1	1.91945	wBm_chung_2019
IPR020590:Guanylate kinase, conserved site	1	4	0.475007	1	1.91945	wBm_chung_2019
IPR022569:Ferredoxin, C-terminal	1	4	0.475007	1	1.91945	wBm_chung_2019
IPR023386:Lysine-tRNA ligase, insertion domain	1	4	0.475007	1	1.91945	wBm_chung_2019
IPR023627:Recombination protein RecR	1	4	0.475007	1	1.91945	wBm_chung_2019
IPR023628:Recombination protein RecR, C4-type zinc finger	1	4	0.475007	1	1.91945	wBm_chung_2019
IPR027795:GATS-like ACT domain	1	4	0.475007	1	1.91945	wBm_chung_2019
IPR029460:DNA polymerase, helix-hairpin-helix motif	1	4	0.475007	1	1.91945	wBm_chung_2019
IPR033714:Phenylalanly tRNA synthetase, tRNA-binding-domain	1	4	0.475007	1	1.91945	wBm_chung_2019
IPR034137:RecR, TOPRIM domain	1	4	0.475007	1	1.91945	wBm_chung_2019
IPR036113:Glu-tRNAGln amidotransferase superfamily, subunit C	1	4	0.475007	1	1.91945	wBm_chung_2019
IPR036269:Rho termination factor, N-terminal domain superfamily	1	4	0.475007	1	1.91945	wBm_chung_2019
IPR038717:Tc1-like transposase, DDE domain	1	4	0.475007	1	1.91945	wBm_chung_2019
IPR040982:DNA polymerase III alpha subunit finger domain	1	4	0.475007	1	1.91945	wBm_chung_2019
IPR041349:Proline utilization A proline dehydrogenase N-terminal domain	1	4	0.475007	1	1.91945	wBm_chung_2019
IPR041569:AAA ATPase, AAA+ lid domain	1	4	0.475007	1	1.91945	wBm_chung_2019
IPR041663:DisA/LigA, helix-hairpin-helix motif	1	4	0.475007	1	1.91945	wBm_chung_2019
IPR041703:Transcription termination factor Rho, ATP binding domain	1	4	0.475007	1	1.91945	wBm_chung_2019
IPR041931:Bacterial DNA polymerase III alpha subunit, thumb domain	1	4	0.475007	1	1.91945	wBm_chung_2019
GO:0006163:purine nucleotide metabolic process	1	4	0.475007	1	1.91945	wBm_chung_2019
GO:0006430:lysyl-tRNA aminoacylation	1	4	0.475007	1	1.91945	wBm_chung_2019
GO:0006450:regulation of translational fidelity	1	4	0.475007	1	1.91945	wBm_chung_2019
GO:0048034:heme O biosynthetic process	1	4	0.475007	1	1.91945	wBm_chung_2019
GO:0004385:guanylate kinase activity	1	4	0.475007	1	1.91945	wBm_chung_2019
GO:0004526:ribonuclease P activity	1	4	0.475007	1	1.91945	wBm_chung_2019
GO:0004824:lysine-tRNA ligase activity	1	4	0.475007	1	1.91945	wBm_chung_2019
GO:0008186:RNA-dependent ATPase activity	1	4	0.475007	1	1.91945	wBm_chung_2019
GO:0008495:protoheme IX farnesyltransferase activity	1	4	0.475007	1	1.91945	wBm_chung_2019
GO:0008686:3,4-dihydroxy-2-butanone-4-phosphate synthase activity	1	4	0.475007	1	1.91945	wBm_chung_2019
GO:0008716:D-alanine-D-alanine ligase activity	1	4	0.475007	1	1.91945	wBm_chung_2019
IPR000089:Biotin/lipoyl attachment	3	15	0.476429	1	1.44742	wBm_chung_2019
IPR001179:FKBP-type peptidyl-prolyl cis-trans isomerase domain	3	15	0.476429	1	1.44742	wBm_chung_2019
IPR001387:Cro/C1-type helix-turn-helix domain	3	15	0.476429	1	1.44742	wBm_chung_2019
IPR002305:Aminoacyl-tRNA synthetase, class Ic	3	15	0.476429	1	1.44742	wBm_chung_2019
IPR007197:Radical SAM	3	15	0.476429	1	1.44742	wBm_chung_2019
IPR011053:Single hybrid motif	3	15	0.476429	1	1.44742	wBm_chung_2019
IPR011054:Rudiment single hybrid motif	3	15	0.476429	1	1.44742	wBm_chung_2019
IPR013126:Heat shock protein 70 family	3	15	0.476429	1	1.44742	wBm_chung_2019
IPR018181:Heat shock protein 70, conserved site	3	15	0.476429	1	1.44742	wBm_chung_2019
IPR029047:Heat shock protein 70kD, peptide-binding domain	3	15	0.476429	1	1.44742	wBm_chung_2019
GO:0016746:transferase activity, transferring acyl groups	3	15	0.476429	1	1.44742	wBm_chung_2019
GO:0048038:quinone binding	3	15	0.476429	1	1.44742	wBm_chung_2019
No GO terms for biological process	15	121	0.478284	1	0.776838	wBm_chung_2019
IPR012340:Nucleic acid-binding, OB-fold	13	74	0.487467	1	1.25742	wBm_chung_2019
IPR011034:Formyl transferase, C-terminal-like	1	16	0.48862	1	0.376295	wBm_chung_2019
IPR025161:Putative transposase IS4/IS5 family	1	16	0.48862	1	0.376295	wBm_chung_2019
GO:0006351:transcription, DNA-templated	1	16	0.48862	1	0.376295	wBm_chung_2019
GO:0003899:DNA-directed 5'-3' RNA polymerase activity	1	16	0.48862	1	0.376295	wBm_chung_2019
IPR002566:Surface antigen msp4	1	17	0.490539	1	0.352128	wBm_chung_2019
GO:0005975:carbohydrate metabolic process	4	39	0.493681	1	0.640894	wBm_chung_2019
GO:0008270:zinc ion binding	4	39	0.493681	1	0.640894	wBm_chung_2019
GO:0045454:cell redox homeostasis	4	41	0.494894	1	0.603916	wBm_chung_2019
IPR002942:RNA-binding S4 domain	1	18	0.49678	1	0.330803	wBm_chung_2019
IPR011250:Outer membrane protein/outer membrane enzyme PagP, beta-barrel	1	18	0.49678	1	0.330803	wBm_chung_2019
GO:0005887:integral component of plasma membrane	1	18	0.49678	1	0.330803	wBm_chung_2019
GO:0005315:inorganic phosphate transmembrane transporter activity	1	18	0.49678	1	0.330803	wBm_chung_2019
IPR000515:ABC transporter type 1, transmembrane domain MetI-like	4	19	0.506753	1	1.55188	wBm_chung_2019
IPR002347:Short-chain dehydrogenase/reductase SDR	4	19	0.506753	1	1.55188	wBm_chung_2019
IPR035906:MetI-like superfamily	4	19	0.506753	1	1.55188	wBm_chung_2019
IPR004101:Mur ligase, C-terminal	4	20	0.519878	1	1.45234	wBm_chung_2019
IPR009019:K homology domain, prokaryotic type	4	20	0.519878	1	1.45234	wBm_chung_2019
GO:0015886:heme transport	4	20	0.519878	1	1.45234	wBm_chung_2019
GO:0015232:heme transporter activity	4	20	0.519878	1	1.45234	wBm_chung_2019
GO:0022857:transmembrane transporter activity	4	20	0.519878	1	1.45234	wBm_chung_2019
GO:0016491:oxidoreductase activity	16	95	0.534069	1	1.19434	wBm_chung_2019
IPR010982:Lambda repressor-like, DNA-binding domain	4	22	0.553391	1	1.28638	wBm_chung_2019
IPR022967:RNA-binding domain, S1	4	22	0.553391	1	1.28638	wBm_chung_2019
IPR000185:Protein translocase subunit SecA	1	5	0.553426	1	1.4379	wBm_chung_2019
IPR000659:Pyridoxamine 5'-phosphate oxidase	1	5	0.553426	1	1.4379	wBm_chung_2019
IPR001055:Adrenodoxin	1	5	0.553426	1	1.4379	wBm_chung_2019
IPR001347:Sugar isomerase (SIS)	1	5	0.553426	1	1.4379	wBm_chung_2019
IPR001516:NADH-Ubiquinone oxidoreductase (complex I), chain 5 N-terminal	1	5	0.553426	1	1.4379	wBm_chung_2019
IPR001708:Membrane insertase OXA1/ALB3/YidC	1	5	0.553426	1	1.4379	wBm_chung_2019
IPR001736:Phospholipase D/Transphosphatidylase	1	5	0.553426	1	1.4379	wBm_chung_2019
IPR001901:Protein translocase complex, SecE/Sec61-gamma subunit	1	5	0.553426	1	1.4379	wBm_chung_2019
IPR002171:Ribosomal protein L2	1	5	0.553426	1	1.4379	wBm_chung_2019
IPR002180:6,7-dimethyl-8-ribityllumazine synthase	1	5	0.553426	1	1.4379	wBm_chung_2019
IPR002694:Zinc finger, CHC2-type	1	5	0.553426	1	1.4379	wBm_chung_2019
IPR002872:Proline dehydrogenase domain	1	5	0.553426	1	1.4379	wBm_chung_2019
IPR003016:2-oxo acid dehydrogenase, lipoyl-binding site	1	5	0.553426	1	1.4379	wBm_chung_2019
IPR003115:ParB/Sulfiredoxin	1	5	0.553426	1	1.4379	wBm_chung_2019
IPR003142:Biotin protein ligase, C-terminal	1	5	0.553426	1	1.4379	wBm_chung_2019
IPR003346:Transposase, IS116/IS110/IS902	1	5	0.553426	1	1.4379	wBm_chung_2019
IPR003945:NADH-plastoquinone oxidoreductase, chain 5	1	5	0.553426	1	1.4379	wBm_chung_2019
IPR004027:SEC-C motif	1	5	0.553426	1	1.4379	wBm_chung_2019
IPR004036:Endonuclease III-like, conserved site-2	1	5	0.553426	1	1.4379	wBm_chung_2019
IPR004412:Glutamyl-tRNA(Gln) amidotransferase A subunit	1	5	0.553426	1	1.4379	wBm_chung_2019
IPR004416:tRNA uridine 5-carboxymethylaminomethyl modification enzyme MnmG	1	5	0.553426	1	1.4379	wBm_chung_2019
IPR004692:Preprotein translocase SecG subunit	1	5	0.553426	1	1.4379	wBm_chung_2019
IPR005616:CcmH/CycL/Ccl2/NrfF family	1	5	0.553426	1	1.4379	wBm_chung_2019
IPR005758:UDP-N-acetylmuramate--L-alanine ligase	1	5	0.553426	1	1.4379	wBm_chung_2019
IPR005807:SecE subunit of protein translocation complex	1	5	0.553426	1	1.4379	wBm_chung_2019
IPR005855:Glucosamine-fructose-6-phosphate aminotransferase, isomerising	1	5	0.553426	1	1.4379	wBm_chung_2019
IPR005880:Ribosomal protein L2, bacterial/organellar-type	1	5	0.553426	1	1.4379	wBm_chung_2019
IPR005933:Delta-1-pyrroline-5-carboxylate dehydrogenase 3	1	5	0.553426	1	1.4379	wBm_chung_2019
IPR006128:Adhesion lipoprotein	1	5	0.553426	1	1.4379	wBm_chung_2019
IPR006255:Dihydrolipoamide succinyltransferase	1	5	0.553426	1	1.4379	wBm_chung_2019
IPR006295:DNA primase, DnaG	1	5	0.553426	1	1.4379	wBm_chung_2019
IPR006424:Glyceraldehyde-3-phosphate dehydrogenase, type I	1	5	0.553426	1	1.4379	wBm_chung_2019
IPR008869:Toluene tolerance Ttg2/phospholipid-binding protein MlaC	1	5	0.553426	1	1.4379	wBm_chung_2019
IPR010227:NADH-quinone oxidoreductase, chain M/4	1	5	0.553426	1	1.4379	wBm_chung_2019
IPR010916:TonB box, conserved site	1	5	0.553426	1	1.4379	wBm_chung_2019
IPR010997:HRDC-like	1	5	0.553426	1	1.4379	wBm_chung_2019
IPR011115:SecA DEAD-like, N-terminal	1	5	0.553426	1	1.4379	wBm_chung_2019
IPR011116:SecA Wing/Scaffold	1	5	0.553426	1	1.4379	wBm_chung_2019
IPR011130:SecA preprotein, cross-linking domain	1	5	0.553426	1	1.4379	wBm_chung_2019
IPR013264:DNA primase, catalytic core, N-terminal	1	5	0.553426	1	1.4379	wBm_chung_2019
IPR013685:Polypeptide-transport-associated, FtsQ-type	1	5	0.553426	1	1.4379	wBm_chung_2019
IPR014018:SecA motor DEAD	1	5	0.553426	1	1.4379	wBm_chung_2019
IPR014029:NADH:ubiquinone oxidoreductase, 49kDa subunit, conserved site	1	5	0.553426	1	1.4379	wBm_chung_2019
IPR014726:Ribosomal protein L2, domain 3	1	5	0.553426	1	1.4379	wBm_chung_2019
IPR014758:Methionyl-tRNA synthetase	1	5	0.553426	1	1.4379	wBm_chung_2019
IPR015590:Aldehyde dehydrogenase domain	1	5	0.553426	1	1.4379	wBm_chung_2019
IPR016160:Aldehyde dehydrogenase, cysteine active site	1	5	0.553426	1	1.4379	wBm_chung_2019
IPR016161:Aldehyde/histidinol dehydrogenase	1	5	0.553426	1	1.4379	wBm_chung_2019
IPR016162:Aldehyde dehydrogenase N-terminal domain	1	5	0.553426	1	1.4379	wBm_chung_2019
IPR016163:Aldehyde dehydrogenase, C-terminal	1	5	0.553426	1	1.4379	wBm_chung_2019
IPR018264:Ribosomal protein L33, conserved site	1	5	0.553426	1	1.4379	wBm_chung_2019
IPR018298:Adrenodoxin, iron-sulphur binding site	1	5	0.553426	1	1.4379	wBm_chung_2019
IPR019288:Predicted 3'-5' exonuclease, PolB-like	1	5	0.553426	1	1.4379	wBm_chung_2019
IPR019479:Peroxiredoxin, C-terminal	1	5	0.553426	1	1.4379	wBm_chung_2019
IPR019591:Mrp/NBP35 ATP-binding protein	1	5	0.553426	1	1.4379	wBm_chung_2019
IPR019998:Membrane insertase YidC	1	5	0.553426	1	1.4379	wBm_chung_2019
IPR020556:Amidase, conserved site	1	5	0.553426	1	1.4379	wBm_chung_2019
IPR020595:MnmG-related, conserved site	1	5	0.553426	1	1.4379	wBm_chung_2019
IPR020937:SecA conserved site	1	5	0.553426	1	1.4379	wBm_chung_2019
IPR022666:Ribosomal Proteins L2, RNA binding domain	1	5	0.553426	1	1.4379	wBm_chung_2019
IPR022669:Ribosomal protein L2, C-terminal	1	5	0.553426	1	1.4379	wBm_chung_2019
IPR022671:Ribosomal protein L2, conserved site	1	5	0.553426	1	1.4379	wBm_chung_2019
IPR022885:NAD(P)H-quinone oxidoreductase subunit D/H	1	5	0.553426	1	1.4379	wBm_chung_2019
IPR023457:Methionine-tRNA synthetase, type 2	1	5	0.553426	1	1.4379	wBm_chung_2019
IPR023631:Amidase signature domain	1	5	0.553426	1	1.4379	wBm_chung_2019
IPR024082:Proline dehydrogenase PutA, domain II	1	5	0.553426	1	1.4379	wBm_chung_2019
IPR025202:Phospholipase D-like domain	1	5	0.553426	1	1.4379	wBm_chung_2019
IPR025668:Transposase DDE domain	1	5	0.553426	1	1.4379	wBm_chung_2019
IPR025703:Bifunctional protein PutA	1	5	0.553426	1	1.4379	wBm_chung_2019
IPR026904:GidA associated domain 3	1	5	0.553426	1	1.4379	wBm_chung_2019
IPR028053:Membrane insertase YidC, N-terminal	1	5	0.553426	1	1.4379	wBm_chung_2019
IPR028055:Membrane insertase YidC/Oxa1, C-terminal	1	5	0.553426	1	1.4379	wBm_chung_2019
IPR029041:FAD-linked oxidoreductase-like	1	5	0.553426	1	1.4379	wBm_chung_2019
IPR030846:DNA primase DnaG, bacteria	1	5	0.553426	1	1.4379	wBm_chung_2019
IPR032819:tRNA pseudouridylate synthase B, C-terminal	1	5	0.553426	1	1.4379	wBm_chung_2019
IPR033756:Flagellum site-determining protein YlxH/ Fe-S cluster assembling factor NBP35	1	5	0.553426	1	1.4379	wBm_chung_2019
IPR033911:Methioninyl-tRNA synthetase core domain	1	5	0.553426	1	1.4379	wBm_chung_2019
IPR034151:Bacterial DnaG primase, TOPRIM domain	1	5	0.553426	1	1.4379	wBm_chung_2019
IPR035466:GlmS/AgaS, SIS domain 1	1	5	0.553426	1	1.4379	wBm_chung_2019
IPR035490:GlmS/FrlB, SIS domain 2	1	5	0.553426	1	1.4379	wBm_chung_2019
IPR036086:ParB/Sulfiredoxin superfamily	1	5	0.553426	1	1.4379	wBm_chung_2019
IPR036266:SecA, Wing/Scaffold superfamily	1	5	0.553426	1	1.4379	wBm_chung_2019
IPR036467:Lumazine/riboflavin synthase superfamily	1	5	0.553426	1	1.4379	wBm_chung_2019
IPR036670:SecA, preprotein cross-linking domain superfamily	1	5	0.553426	1	1.4379	wBm_chung_2019
IPR036928:Amidase signature (AS) superfamily	1	5	0.553426	1	1.4379	wBm_chung_2019
IPR036977:DNA Primase, CHC2-type zinc finger	1	5	0.553426	1	1.4379	wBm_chung_2019
IPR037068:DNA primase, catalytic core, N-terminal domain superfamily	1	5	0.553426	1	1.4379	wBm_chung_2019
IPR038210:Membrane insertase YidC, periplasmic domain	1	5	0.553426	1	1.4379	wBm_chung_2019
IPR038221:YidC, periplasmic domain superfamily	1	5	0.553426	1	1.4379	wBm_chung_2019
IPR038297:CcmH/CycL/Ccl2/NrfF domain superfamily	1	5	0.553426	1	1.4379	wBm_chung_2019
IPR038379:SecE superfamily	1	5	0.553426	1	1.4379	wBm_chung_2019
IPR041872:Methionyl-tRNA synthetase, anticodon-binding domain	1	5	0.553426	1	1.4379	wBm_chung_2019
GO:0002098:tRNA wobble uridine modification	1	5	0.553426	1	1.4379	wBm_chung_2019
GO:0006006:glucose metabolic process	1	5	0.553426	1	1.4379	wBm_chung_2019
GO:0006269:DNA replication, synthesis of RNA primer	1	5	0.553426	1	1.4379	wBm_chung_2019
GO:0006431:methionyl-tRNA aminoacylation	1	5	0.553426	1	1.4379	wBm_chung_2019
GO:0006525:arginine metabolic process	1	5	0.553426	1	1.4379	wBm_chung_2019
GO:0006561:proline biosynthetic process	1	5	0.553426	1	1.4379	wBm_chung_2019
GO:0007155:cell adhesion	1	5	0.553426	1	1.4379	wBm_chung_2019
GO:0010133:proline catabolic process to glutamate	1	5	0.553426	1	1.4379	wBm_chung_2019
GO:1901135:carbohydrate derivative metabolic process	1	5	0.553426	1	1.4379	wBm_chung_2019
GO:1901137:carbohydrate derivative biosynthetic process	1	5	0.553426	1	1.4379	wBm_chung_2019
GO:0009349:riboflavin synthase complex	1	5	0.553426	1	1.4379	wBm_chung_2019
GO:0030956:glutamyl-tRNA(Gln) amidotransferase complex	1	5	0.553426	1	1.4379	wBm_chung_2019
GO:0045252:oxoglutarate dehydrogenase complex	1	5	0.553426	1	1.4379	wBm_chung_2019
GO:0003896:DNA primase activity	1	5	0.553426	1	1.4379	wBm_chung_2019
GO:0004149:dihydrolipoyllysine-residue succinyltransferase activity	1	5	0.553426	1	1.4379	wBm_chung_2019
GO:0004360:glutamine-fructose-6-phosphate transaminase (isomerizing) activity	1	5	0.553426	1	1.4379	wBm_chung_2019
GO:0004657:proline dehydrogenase activity	1	5	0.553426	1	1.4379	wBm_chung_2019
GO:0004733:pyridoxamine-phosphate oxidase activity	1	5	0.553426	1	1.4379	wBm_chung_2019
GO:0004825:methionine-tRNA ligase activity	1	5	0.553426	1	1.4379	wBm_chung_2019
GO:0008763:UDP-N-acetylmuramate-L-alanine ligase activity	1	5	0.553426	1	1.4379	wBm_chung_2019
GO:0032977:membrane insertase activity	1	5	0.553426	1	1.4379	wBm_chung_2019
GO:0050567:glutaminyl-tRNA synthase (glutamine-hydrolyzing) activity	1	5	0.553426	1	1.4379	wBm_chung_2019
GO:0051920:peroxiredoxin activity	1	5	0.553426	1	1.4379	wBm_chung_2019
GO:0097367:carbohydrate derivative binding	1	5	0.553426	1	1.4379	wBm_chung_2019
IPR014070:Wolbachia palindromic element (WPE)	2	24	0.558433	1	0.511674	wBm_chung_2019
GO:0003735:structural constituent of ribosome	19	115	0.564371	1	1.16901	wBm_chung_2019
GO:0015934:large ribosomal subunit	5	26	0.570118	1	1.38546	wBm_chung_2019
GO:0003700:transcription factor activity, sequence-specific DNA binding	5	27	0.579444	1	1.32008	wBm_chung_2019
GO:0016829:lyase activity	5	27	0.579444	1	1.32008	wBm_chung_2019
IPR003594:Histidine kinase-like ATPase, C-terminal domain	5	28	0.590684	1	1.26038	wBm_chung_2019
IPR036890:Histidine kinase/HSP90-like ATPase superfamily	5	28	0.590684	1	1.26038	wBm_chung_2019
GO:0006221:pyrimidine nucleotide biosynthetic process	5	28	0.590684	1	1.26038	wBm_chung_2019
GO:0033014:tetrapyrrole biosynthetic process	5	28	0.590684	1	1.26038	wBm_chung_2019
GO:0019843:rRNA binding	5	28	0.590684	1	1.26038	wBm_chung_2019
IPR000158:Cell division protein FtsZ	0	6	0.599138	1	0	wBm_chung_2019
IPR000477:Reverse transcriptase domain	0	6	0.599138	1	0	wBm_chung_2019
IPR000926:GTP cyclohydrolase II, RibA	0	6	0.599138	1	0	wBm_chung_2019
IPR001189:Manganese/iron superoxide dismutase	0	6	0.599138	1	0	wBm_chung_2019
IPR001482:Type II secretion system protein E	0	6	0.599138	1	0	wBm_chung_2019
IPR001667:DDH domain	0	6	0.599138	1	0	wBm_chung_2019
IPR001857:Ribosomal protein L19	0	6	0.599138	1	0	wBm_chung_2019
IPR001867:OmpR/PhoB-type DNA-binding domain	0	6	0.599138	1	0	wBm_chung_2019
IPR001892:Ribosomal protein S13	0	6	0.599138	1	0	wBm_chung_2019
IPR001911:Ribosomal protein S21	0	6	0.599138	1	0	wBm_chung_2019
IPR001957:Chromosomal replication control, initiator DnaA	0	6	0.599138	1	0	wBm_chung_2019
IPR001971:Ribosomal protein S11	0	6	0.599138	1	0	wBm_chung_2019
IPR002036:Endoribonuclease YbeY	0	6	0.599138	1	0	wBm_chung_2019
IPR002132:Ribosomal protein L5	0	6	0.599138	1	0	wBm_chung_2019
IPR002146:ATP synthase, F0 complex, subunit b/b', bacterial/chloroplast	0	6	0.599138	1	0	wBm_chung_2019
IPR002474:Carbamoyl-phosphate synthase, small subunit N-terminal domain	0	6	0.599138	1	0	wBm_chung_2019
IPR002550:Domain of unknown function DUF21	0	6	0.599138	1	0	wBm_chung_2019
IPR002649:tRNA (guanine-N1-)-methyltransferase, bacteria	0	6	0.599138	1	0	wBm_chung_2019
IPR002877:Ribosomal RNA methyltransferase FtsJ domain	0	6	0.599138	1	0	wBm_chung_2019
IPR003008:Tubulin/FtsZ, GTPase domain	0	6	0.599138	1	0	wBm_chung_2019
IPR003567:Cytochrome c-type biogenesis protein	0	6	0.599138	1	0	wBm_chung_2019
IPR003698:Lipoyl synthase	0	6	0.599138	1	0	wBm_chung_2019
IPR003708:Bacterial protein export chaperone SecB	0	6	0.599138	1	0	wBm_chung_2019
IPR003782:Copper chaperone SCO1/SenC	0	6	0.599138	1	0	wBm_chung_2019
IPR004489:Succinate dehydrogenase/fumarate reductase iron-sulphur protein	0	6	0.599138	1	0	wBm_chung_2019
IPR004556:Modification methylase HemK	0	6	0.599138	1	0	wBm_chung_2019
IPR004610:Bacterial RecJ exonuclease	0	6	0.599138	1	0	wBm_chung_2019
IPR004733:Phosphoribosylformylglycinamidine cyclo-ligase	0	6	0.599138	1	0	wBm_chung_2019
IPR004843:Calcineurin-like phosphoesterase domain, ApaH type	0	6	0.599138	1	0	wBm_chung_2019
IPR005122:Uracil-DNA glycosylase-like	0	6	0.599138	1	0	wBm_chung_2019
IPR005273:Uracil-DNA glycosylase family 4	0	6	0.599138	1	0	wBm_chung_2019
IPR005498:Type IV secretion system, VirB10 / TraB / TrbI	0	6	0.599138	1	0	wBm_chung_2019
IPR005631:Flavinator of succinate dehydrogenase	0	6	0.599138	1	0	wBm_chung_2019
IPR005746:Thioredoxin	0	6	0.599138	1	0	wBm_chung_2019
IPR005809:Succinate--CoA synthetase, beta subunit	0	6	0.599138	1	0	wBm_chung_2019
IPR006058:2Fe-2S ferredoxin, iron-sulphur binding site	0	6	0.599138	1	0	wBm_chung_2019
IPR006274:Carbamoyl-phosphate synthase, small subunit	0	6	0.599138	1	0	wBm_chung_2019
IPR006370:4-hydroxybenzoate polyprenyltransferase	0	6	0.599138	1	0	wBm_chung_2019
IPR007379:Tim44-like domain	0	6	0.599138	1	0	wBm_chung_2019
IPR007430:Bacterial virulence protein VirB8	0	6	0.599138	1	0	wBm_chung_2019
IPR007848:Methyltransferase small domain	0	6	0.599138	1	0	wBm_chung_2019
IPR007922:Protein of unknown function DUF721/UPF0232	0	6	0.599138	1	0	wBm_chung_2019
IPR008162:Inorganic pyrophosphatase	0	6	0.599138	1	0	wBm_chung_2019
IPR008280:Tubulin/FtsZ, C-terminal	0	6	0.599138	1	0	wBm_chung_2019
IPR009051:Alpha-helical ferredoxin	0	6	0.599138	1	0	wBm_chung_2019
IPR010074:Phosphoribosylformylglycinamidine subunit PurL	0	6	0.599138	1	0	wBm_chung_2019
IPR010075:Phosphoribosylformylglycinamidine synthase subunit PurQ	0	6	0.599138	1	0	wBm_chung_2019
IPR010084:Beta-hydroxyacyl-(acyl-carrier-protein) dehydratase FabZ	0	6	0.599138	1	0	wBm_chung_2019
IPR010921:Trp repressor/replication initiator	0	6	0.599138	1	0	wBm_chung_2019
IPR011335:Restriction endonuclease type II-like	0	6	0.599138	1	0	wBm_chung_2019
IPR011900:Glutaredoxin, GrxC	0	6	0.599138	1	0	wBm_chung_2019
IPR012135:Dihydroorotate dehydrogenase, class 1/ 2	0	6	0.599138	1	0	wBm_chung_2019
IPR013105:Tetratricopeptide repeat 2	0	6	0.599138	1	0	wBm_chung_2019
IPR013114:Beta-hydroxydecanoyl thiol ester dehydrase, FabA/FabZ	0	6	0.599138	1	0	wBm_chung_2019
IPR013159:Chromosomal replication initiator, DnaA C-terminal	0	6	0.599138	1	0	wBm_chung_2019
IPR013597:Group II intron, maturase-specific	0	6	0.599138	1	0	wBm_chung_2019
IPR013650:ATP-grasp fold, succinyl-CoA synthetase-type	0	6	0.599138	1	0	wBm_chung_2019
IPR014155:Type IV secretion system protein VirB11	0	6	0.599138	1	0	wBm_chung_2019
IPR015507:Ribosomal RNA large subunit methyltransferase E	0	6	0.599138	1	0	wBm_chung_2019
IPR016009:tRNA methyltransferase TRMD/TRM10-type domain	0	6	0.599138	1	0	wBm_chung_2019
IPR016985:Uncharacterised conserved protein UCP031890, Tim44-related	0	6	0.599138	1	0	wBm_chung_2019
IPR017866:Succinyl-CoA synthetase, beta subunit, conserved site	0	6	0.599138	1	0	wBm_chung_2019
IPR018269:Ribosomal protein S13, conserved site	0	6	0.599138	1	0	wBm_chung_2019
IPR018312:Chromosomal replication control, initiator DnaA, conserved site	0	6	0.599138	1	0	wBm_chung_2019
IPR018316:Tubulin/FtsZ, 2-layer sandwich domain	0	6	0.599138	1	0	wBm_chung_2019
IPR019831:Manganese/iron superoxide dismutase, N-terminal	0	6	0.599138	1	0	wBm_chung_2019
IPR019832:Manganese/iron superoxide dismutase, C-terminal	0	6	0.599138	1	0	wBm_chung_2019
IPR019833:Manganese/iron superoxide dismutase, binding site	0	6	0.599138	1	0	wBm_chung_2019
IPR019874:Protein-(glutamine-N5) methyltransferase, release factor-specific	0	6	0.599138	1	0	wBm_chung_2019
IPR019980:Ribosomal protein S13, bacterial-type	0	6	0.599138	1	0	wBm_chung_2019
IPR020143:Uncharacterised protein family, RP436	0	6	0.599138	1	0	wBm_chung_2019
IPR020549:Endoribonuclease YbeY, conserved site	0	6	0.599138	1	0	wBm_chung_2019
IPR020591:Chromosomal replication control, initiator DnaA-like	0	6	0.599138	1	0	wBm_chung_2019
IPR020805:Cell division protein FtsZ, conserved site	0	6	0.599138	1	0	wBm_chung_2019
IPR020929:Ribosomal protein L5, conserved site	0	6	0.599138	1	0	wBm_chung_2019
IPR022803:Ribosomal protein L5 domain	0	6	0.599138	1	0	wBm_chung_2019
IPR023091:Metalloprotease catalytic domain, predicted	0	6	0.599138	1	0	wBm_chung_2019
IPR023148:tRNA (guanine-N1-)-methyltransferase, C-terminal	0	6	0.599138	1	0	wBm_chung_2019
IPR024107:Tyrosine-tRNA ligase, bacterial-type, type 1	0	6	0.599138	1	0	wBm_chung_2019
IPR024633:DnaA N-terminal domain	0	6	0.599138	1	0	wBm_chung_2019
IPR024757:Cell division protein FtsZ, C-terminal	0	6	0.599138	1	0	wBm_chung_2019
IPR025192:Succinate dehydogenase/fumarate reductase N-terminal	0	6	0.599138	1	0	wBm_chung_2019
IPR026264:Type IV secretion system protein VirB8/PtlE	0	6	0.599138	1	0	wBm_chung_2019
IPR027437:30s ribosomal protein S13, C-terminal	0	6	0.599138	1	0	wBm_chung_2019
IPR029052:Metallo-dependent phosphatase-like	0	6	0.599138	1	0	wBm_chung_2019
IPR029069:HotDog domain	0	6	0.599138	1	0	wBm_chung_2019
IPR029903:RmlD-like substrate binding domain	0	6	0.599138	1	0	wBm_chung_2019
IPR031309:Ribosomal protein L5, C-terminal	0	6	0.599138	1	0	wBm_chung_2019
IPR031310:Ribosomal protein L5, N-terminal	0	6	0.599138	1	0	wBm_chung_2019
IPR031691:Lipoyl synthase, N-terminal	0	6	0.599138	1	0	wBm_chung_2019
IPR032523:Cytochrome c-type biogenesis protein CcmF, C-terminal	0	6	0.599138	1	0	wBm_chung_2019
IPR032677:GTP cyclohydrolase II	0	6	0.599138	1	0	wBm_chung_2019
IPR035686:Carbamoyl-phosphate synthase small subunit, GATase1 domain	0	6	0.599138	1	0	wBm_chung_2019
IPR035958:SecB-like superfamily	0	6	0.599138	1	0	wBm_chung_2019
IPR036144:RibA-like superfamily	0	6	0.599138	1	0	wBm_chung_2019
IPR036314:Manganese/iron superoxide dismutase, C-terminal domain superfamily	0	6	0.599138	1	0	wBm_chung_2019
IPR036324:Manganese/iron superoxide dismutase, N-terminal domain superfamily	0	6	0.599138	1	0	wBm_chung_2019
IPR036480:Carbamoyl-phosphate synthase small subunit, N-terminal domain superfamily	0	6	0.599138	1	0	wBm_chung_2019
IPR036525:Tubulin/FtsZ, GTPase domain superfamily	0	6	0.599138	1	0	wBm_chung_2019
IPR036649:Inorganic pyrophosphatase superfamily	0	6	0.599138	1	0	wBm_chung_2019
IPR036714:Flavinator of succinate dehydrogenase superfamily	0	6	0.599138	1	0	wBm_chung_2019
IPR036895:Uracil-DNA glycosylase-like domain superfamily	0	6	0.599138	1	0	wBm_chung_2019
IPR036967:Ribosomal protein S11 superfamily	0	6	0.599138	1	0	wBm_chung_2019
IPR038454:DnaA, N-terminal domain superfamily	0	6	0.599138	1	0	wBm_chung_2019
IPR038657:Ribosomal protein L19 superfamily	0	6	0.599138	1	0	wBm_chung_2019
IPR038763:DHH phosphoesterase superfamily	0	6	0.599138	1	0	wBm_chung_2019
IPR040758:Release factor glutamine methyltransferase, N-terminal domain	0	6	0.599138	1	0	wBm_chung_2019
IPR041122:RecJ, OB domain	0	6	0.599138	1	0	wBm_chung_2019
IPR041609:Phosphoribosylformylglycinamidine synthase, linker domain	0	6	0.599138	1	0	wBm_chung_2019
GO:0001510:RNA methylation	0	6	0.599138	1	0	wBm_chung_2019
GO:0006222:UMP biosynthetic process	0	6	0.599138	1	0	wBm_chung_2019
GO:0006275:regulation of DNA replication	0	6	0.599138	1	0	wBm_chung_2019
GO:0006479:protein methylation	0	6	0.599138	1	0	wBm_chung_2019
GO:0006541:glutamine metabolic process	0	6	0.599138	1	0	wBm_chung_2019
GO:0006662:glycerol ether metabolic process	0	6	0.599138	1	0	wBm_chung_2019
GO:0006796:phosphate-containing compound metabolic process	0	6	0.599138	1	0	wBm_chung_2019
GO:0006801:superoxide metabolic process	0	6	0.599138	1	0	wBm_chung_2019
GO:0009107:lipoate biosynthetic process	0	6	0.599138	1	0	wBm_chung_2019
GO:0044097:secretion by the type IV secretion system	0	6	0.599138	1	0	wBm_chung_2019
GO:0051262:protein tetramerization	0	6	0.599138	1	0	wBm_chung_2019
GO:0043684:type IV secretion system complex	0	6	0.599138	1	0	wBm_chung_2019
GO:0003688:DNA replication origin binding	0	6	0.599138	1	0	wBm_chung_2019
GO:0003935:GTP cyclohydrolase II activity	0	6	0.599138	1	0	wBm_chung_2019
GO:0004088:carbamoyl-phosphate synthase (glutamine-hydrolyzing) activity	0	6	0.599138	1	0	wBm_chung_2019
GO:0004427:inorganic diphosphatase activity	0	6	0.599138	1	0	wBm_chung_2019
GO:0004641:phosphoribosylformylglycinamidine cyclo-ligase activity	0	6	0.599138	1	0	wBm_chung_2019
GO:0004659:prenyltransferase activity	0	6	0.599138	1	0	wBm_chung_2019
GO:0004784:superoxide dismutase activity	0	6	0.599138	1	0	wBm_chung_2019
GO:0008276:protein methyltransferase activity	0	6	0.599138	1	0	wBm_chung_2019
GO:0008409:5'-3' exonuclease activity	0	6	0.599138	1	0	wBm_chung_2019
GO:0016836:hydro-lyase activity	0	6	0.599138	1	0	wBm_chung_2019
GO:0016992:lipoate synthase activity	0	6	0.599138	1	0	wBm_chung_2019
GO:0052906:tRNA (guanine(37)-N(1))-methyltransferase activity	0	6	0.599138	1	0	wBm_chung_2019
IPR000182:GNAT domain	0	7	0.601667	1	0	wBm_chung_2019
IPR000277:Cys/Met metabolism, pyridoxal phosphate-dependent enzyme	0	7	0.601667	1	0	wBm_chung_2019
IPR000358:Ribonucleotide reductase small subunit family	0	7	0.601667	1	0	wBm_chung_2019
IPR000415:Nitroreductase-like	0	7	0.601667	1	0	wBm_chung_2019
IPR000454:ATP synthase, F0 complex, subunit C	0	7	0.601667	1	0	wBm_chung_2019
IPR000568:ATP synthase, F0 complex, subunit A	0	7	0.601667	1	0	wBm_chung_2019
IPR000630:Ribosomal protein S8	0	7	0.601667	1	0	wBm_chung_2019
IPR000702:Ribosomal protein L6	0	7	0.601667	1	0	wBm_chung_2019
IPR000999:Ribonuclease III domain	0	7	0.601667	1	0	wBm_chung_2019
IPR001001:DNA polymerase III, beta chain	0	7	0.601667	1	0	wBm_chung_2019
IPR001021:Ribosomal protein L25, long-form	0	7	0.601667	1	0	wBm_chung_2019
IPR001209:Ribosomal protein S14	0	7	0.601667	1	0	wBm_chung_2019
IPR001357:BRCT domain	0	7	0.601667	1	0	wBm_chung_2019
IPR001404:Heat shock protein Hsp90 family	0	7	0.601667	1	0	wBm_chung_2019
IPR001406:Pseudouridine synthase I, TruA	0	7	0.601667	1	0	wBm_chung_2019
IPR001469:ATP synthase, F1 complex, delta/epsilon subunit	0	7	0.601667	1	0	wBm_chung_2019
IPR001537:tRNA/rRNA methyltransferase, SpoU type	0	7	0.601667	1	0	wBm_chung_2019
IPR001653:Diaminopimelate epimerase, DapF	0	7	0.601667	1	0	wBm_chung_2019
IPR001679:NAD-dependent DNA ligase	0	7	0.601667	1	0	wBm_chung_2019
IPR001706:Ribosomal protein L35, non-mitochondrial	0	7	0.601667	1	0	wBm_chung_2019
IPR001796:Dihydrofolate reductase domain	0	7	0.601667	1	0	wBm_chung_2019
IPR001907:ATP-dependent Clp protease proteolytic subunit	0	7	0.601667	1	0	wBm_chung_2019
IPR002319:Phenylalanyl-tRNA synthetase	0	7	0.601667	1	0	wBm_chung_2019
IPR002379:V-ATPase proteolipid subunit C-like domain	0	7	0.601667	1	0	wBm_chung_2019
IPR002695:AICARFT/IMPCHase bienzyme	0	7	0.601667	1	0	wBm_chung_2019
IPR002847:Coenzyme F420:L-glutamate ligase-like domain	0	7	0.601667	1	0	wBm_chung_2019
IPR002938:FAD-binding domain	0	7	0.601667	1	0	wBm_chung_2019
IPR002994:Surfeit locus 1/Shy1	0	7	0.601667	1	0	wBm_chung_2019
IPR003653:Ulp1 protease family, C-terminal catalytic domain	0	7	0.601667	1	0	wBm_chung_2019
IPR003781:CoA-binding	0	7	0.601667	1	0	wBm_chung_2019
IPR004150:NAD-dependent DNA ligase, OB-fold	0	7	0.601667	1	0	wBm_chung_2019
IPR004176:Clp, N-terminal	0	7	0.601667	1	0	wBm_chung_2019
IPR004188:Phenylalanine-tRNA ligase, class II, N-terminal	0	7	0.601667	1	0	wBm_chung_2019
IPR004215:Prokaryotic glutathione synthetase, N-terminal	0	7	0.601667	1	0	wBm_chung_2019
IPR004218:Prokaryotic glutathione synthetase, ATP-binding	0	7	0.601667	1	0	wBm_chung_2019
IPR004276:Glycosyltransferase family 28, N-terminal domain	0	7	0.601667	1	0	wBm_chung_2019
IPR004368:Translation initiation factor IF-1	0	7	0.601667	1	0	wBm_chung_2019
IPR004441:RNA methyltransferase TrmH family	0	7	0.601667	1	0	wBm_chung_2019
IPR004487:Clp protease, ATP-binding subunit ClpX	0	7	0.601667	1	0	wBm_chung_2019
IPR004529:Phenylalanyl-tRNA synthetase, class IIc, alpha subunit	0	7	0.601667	1	0	wBm_chung_2019
IPR004812:Drug resistance transporter Bcr/CmlA subfamily	0	7	0.601667	1	0	wBm_chung_2019
IPR005215:Trigger factor	0	7	0.601667	1	0	wBm_chung_2019
IPR005265:Uncharacterised protein family UPF0093	0	7	0.601667	1	0	wBm_chung_2019
IPR005324:Ribosomal protein S5, C-terminal	0	7	0.601667	1	0	wBm_chung_2019
IPR005712:Ribosomal protein S5, bacterial-type	0	7	0.601667	1	0	wBm_chung_2019
IPR005722:ATP synthase, F1 complex, beta subunit	0	7	0.601667	1	0	wBm_chung_2019
IPR005761:UDP-N-acetylmuramoylalanyl-D-glutamate-2,6-diaminopimelate ligase	0	7	0.601667	1	0	wBm_chung_2019
IPR005793:Formyl transferase, C-terminal	0	7	0.601667	1	0	wBm_chung_2019
IPR005794:Methionyl-tRNA formyltransferase	0	7	0.601667	1	0	wBm_chung_2019
IPR005810:Succinyl-CoA ligase, alpha subunit	0	7	0.601667	1	0	wBm_chung_2019
IPR005813:Ribosomal protein L20	0	7	0.601667	1	0	wBm_chung_2019
IPR005841:Alpha-D-phosphohexomutase superfamily	0	7	0.601667	1	0	wBm_chung_2019
IPR005844:Alpha-D-phosphohexomutase, alpha/beta/alpha domain I	0	7	0.601667	1	0	wBm_chung_2019
IPR005845:Alpha-D-phosphohexomutase, alpha/beta/alpha domain II	0	7	0.601667	1	0	wBm_chung_2019
IPR005846:Alpha-D-phosphohexomutase, alpha/beta/alpha domain III	0	7	0.601667	1	0	wBm_chung_2019
IPR005854:Amidophosphoribosyltransferase	0	7	0.601667	1	0	wBm_chung_2019
IPR006009:N-acetylglucosaminyltransferase, MurG	0	7	0.601667	1	0	wBm_chung_2019
IPR006109:Glycerol-3-phosphate dehydrogenase, NAD-dependent, C-terminal	0	7	0.601667	1	0	wBm_chung_2019
IPR006168:Glycerol-3-phosphate dehydrogenase, NAD-dependent	0	7	0.601667	1	0	wBm_chung_2019
IPR006196:RNA-binding domain, S1, IF1 type	0	7	0.601667	1	0	wBm_chung_2019
IPR006233:Cystathionine beta-lyase, bacterial	0	7	0.601667	1	0	wBm_chung_2019
IPR006284:Glutathione synthetase, prokaryotic	0	7	0.601667	1	0	wBm_chung_2019
IPR006298:GTP-binding protein TypA	0	7	0.601667	1	0	wBm_chung_2019
IPR006664:Outer membrane protein, bacterial	0	7	0.601667	1	0	wBm_chung_2019
IPR006665:OmpA-like domain	0	7	0.601667	1	0	wBm_chung_2019
IPR007055:BON domain	0	7	0.601667	1	0	wBm_chung_2019
IPR007235:Glycosyl transferase, family 28, C-terminal	0	7	0.601667	1	0	wBm_chung_2019
IPR007450:Lipoprotein SmpA/OmlA	0	7	0.601667	1	0	wBm_chung_2019
IPR007479:ISC system FeS cluster assembly, IscX	0	7	0.601667	1	0	wBm_chung_2019
IPR007686:YutG/PgpA domain	0	7	0.601667	1	0	wBm_chung_2019
IPR008880:Trigger factor, C-terminal	0	7	0.601667	1	0	wBm_chung_2019
IPR008881:Trigger factor, ribosome-binding, bacterial	0	7	0.601667	1	0	wBm_chung_2019
IPR010603:Zinc finger, ClpX C4-type	0	7	0.601667	1	0	wBm_chung_2019
IPR010971:Ubiquinone biosynthesis hydroxylase UbiH/COQ6	0	7	0.601667	1	0	wBm_chung_2019
IPR011035:Ribosomal protein L25/Gln-tRNA synthetase, anti-codon-binding domain	0	7	0.601667	1	0	wBm_chung_2019
IPR011128:Glycerol-3-phosphate dehydrogenase, NAD-dependent, N-terminal	0	7	0.601667	1	0	wBm_chung_2019
IPR011295:2-polyprenyl-6-methoxyphenol 4-hydroxylase	0	7	0.601667	1	0	wBm_chung_2019
IPR011907:Ribonuclease III	0	7	0.601667	1	0	wBm_chung_2019
IPR012348:Ribonucleotide reductase-related	0	7	0.601667	1	0	wBm_chung_2019
IPR012725:Chaperone DnaK	0	7	0.601667	1	0	wBm_chung_2019
IPR013123:RNA 2-O ribose methyltransferase, substrate binding	0	7	0.601667	1	0	wBm_chung_2019
IPR013328:6-phosphogluconate dehydrogenase, domain 2	0	7	0.601667	1	0	wBm_chung_2019
IPR013810:Ribosomal protein S5, N-terminal	0	7	0.601667	1	0	wBm_chung_2019
IPR013839:NAD-dependent DNA ligase, adenylation	0	7	0.601667	1	0	wBm_chung_2019
IPR013840:NAD-dependent DNA ligase, N-terminal	0	7	0.601667	1	0	wBm_chung_2019
IPR014004:Transport-associated and nodulation domain, bacteria	0	7	0.601667	1	0	wBm_chung_2019
IPR014314:Succinate dehydrogenase, cytochrome b556 subunit	0	7	0.601667	1	0	wBm_chung_2019
IPR014720:Double-stranded RNA-binding domain	0	7	0.601667	1	0	wBm_chung_2019
IPR016055:Alpha-D-phosphohexomutase, alpha/beta/alpha I/II/III	0	7	0.601667	1	0	wBm_chung_2019
IPR016066:Alpha-D-phosphohexomutase, conserved site	0	7	0.601667	1	0	wBm_chung_2019
IPR016084:Haem oxygenase-like, multi-helical	0	7	0.601667	1	0	wBm_chung_2019
IPR016181:Acyl-CoA N-acyltransferase	0	7	0.601667	1	0	wBm_chung_2019
IPR017440:ATP-citrate lyase/succinyl-CoA ligase, active site	0	7	0.601667	1	0	wBm_chung_2019
IPR017597:Pyruvate dehydrogenase (acetyl-transferring) E1 component, alpha subunit, subgroup y	0	7	0.601667	1	0	wBm_chung_2019
IPR017730:Chaperonin ClpB	0	7	0.601667	1	0	wBm_chung_2019
IPR017925:Dihydrofolate reductase conserved site	0	7	0.601667	1	0	wBm_chung_2019
IPR018168:Ubiquinone biosynthesis hydroxylase, UbiH/UbiF/VisC/COQ6, conserved site	0	7	0.601667	1	0	wBm_chung_2019
IPR018192:Ribosomal protein S5, N-terminal, conserved site	0	7	0.601667	1	0	wBm_chung_2019
IPR018215:ClpP, Ser active site	0	7	0.601667	1	0	wBm_chung_2019
IPR018239:NAD-dependent DNA ligase, active site	0	7	0.601667	1	0	wBm_chung_2019
IPR018265:Ribosomal protein L35, conserved site	0	7	0.601667	1	0	wBm_chung_2019
IPR018271:Ribosomal protein S14, conserved site	0	7	0.601667	1	0	wBm_chung_2019
IPR018510:Diaminopimelate epimerase, active site	0	7	0.601667	1	0	wBm_chung_2019
IPR019805:Heat shock protein Hsp90, conserved site	0	7	0.601667	1	0	wBm_chung_2019
IPR019906:Ribosomal protein L6, bacterial-type	0	7	0.601667	1	0	wBm_chung_2019
IPR020040:Ribosomal protein L6, alpha-beta domain	0	7	0.601667	1	0	wBm_chung_2019
IPR020056:Ribosomal protein L25/Gln-tRNA synthetase, beta-barrel domain	0	7	0.601667	1	0	wBm_chung_2019
IPR020057:Ribosomal protein L25, beta domain	0	7	0.601667	1	0	wBm_chung_2019
IPR020095:Pseudouridine synthase I, TruA, C-terminal	0	7	0.601667	1	0	wBm_chung_2019
IPR020097:Pseudouridine synthase I, TruA, alpha/beta domain	0	7	0.601667	1	0	wBm_chung_2019
IPR020546:ATP synthase, F1 complex, delta/epsilon subunit, N-terminal	0	7	0.601667	1	0	wBm_chung_2019
IPR020575:Heat shock protein Hsp90, N-terminal	0	7	0.601667	1	0	wBm_chung_2019
IPR021137:Ribosomal protein L35	0	7	0.601667	1	0	wBm_chung_2019
IPR022634:DNA polymerase III, beta chain, N-terminal	0	7	0.601667	1	0	wBm_chung_2019
IPR022635:DNA polymerase III, beta chain, C-terminal	0	7	0.601667	1	0	wBm_chung_2019
IPR022637:DNA polymerase III, beta chain, central	0	7	0.601667	1	0	wBm_chung_2019
IPR022890:Ferredoxin--NADP reductase, type 2	0	7	0.601667	1	0	wBm_chung_2019
IPR022911:Phenylalanine-tRNA ligase alpha chain 1, bacterial	0	7	0.601667	1	0	wBm_chung_2019
IPR023011:ATP synthase, F0 complex, subunit A, active site	0	7	0.601667	1	0	wBm_chung_2019
IPR023036:Ribosomal protein S14, bacterial/plastid	0	7	0.601667	1	0	wBm_chung_2019
IPR023562:Clp protease proteolytic subunit /Translocation-enhancing protein TepA	0	7	0.601667	1	0	wBm_chung_2019
IPR023635:Peptide deformylase	0	7	0.601667	1	0	wBm_chung_2019
IPR024034:ATPase, F1/V1 complex, beta/alpha subunit, C-terminal	0	7	0.601667	1	0	wBm_chung_2019
IPR024051:AICAR transformylase domain	0	7	0.601667	1	0	wBm_chung_2019
IPR025263:Domain of unknown function DUF3971	0	7	0.601667	1	0	wBm_chung_2019
IPR025877:MobA-like NTP transferase	0	7	0.601667	1	0	wBm_chung_2019
IPR026037:Phosphatidylglycerophosphatase A	0	7	0.601667	1	0	wBm_chung_2019
IPR026416:Putative folate metabolism gamma-glutamate ligase	0	7	0.601667	1	0	wBm_chung_2019
IPR029064:50S ribosomal protein L30e-like	0	7	0.601667	1	0	wBm_chung_2019
IPR029479:Nitroreductase	0	7	0.601667	1	0	wBm_chung_2019
IPR029751:Ribosomal protein L25	0	7	0.601667	1	0	wBm_chung_2019
IPR033135:ClpP, histidine active site	0	7	0.601667	1	0	wBm_chung_2019
IPR033136:NAD-dependent DNA ligase, conserved site	0	7	0.601667	1	0	wBm_chung_2019
IPR033847:ATP-citrate lyase/succinyl-CoA ligase, conserved site	0	7	0.601667	1	0	wBm_chung_2019
IPR033909:Ribonucleotide reductase small subunit	0	7	0.601667	1	0	wBm_chung_2019
IPR035566:Ribosomal protein L20, C-terminal	0	7	0.601667	1	0	wBm_chung_2019
IPR035584:Amidophosphoribosyltransferase, N-terminal	0	7	0.601667	1	0	wBm_chung_2019
IPR035651:BipA, domain V	0	7	0.601667	1	0	wBm_chung_2019
IPR035908:ATP synthase, F0 complex, subunit A superfamily	0	7	0.601667	1	0	wBm_chung_2019
IPR035921:F/V-ATP synthase subunit C superfamily	0	7	0.601667	1	0	wBm_chung_2019
IPR035987:Ribosomal protein S8 superfamily	0	7	0.601667	1	0	wBm_chung_2019
IPR036389:Ribonuclease III, endonuclease domain superfamily	0	7	0.601667	1	0	wBm_chung_2019
IPR036420:BRCT domain superfamily	0	7	0.601667	1	0	wBm_chung_2019
IPR036611:Trigger factor ribosome-binding domain superfamily	0	7	0.601667	1	0	wBm_chung_2019
IPR036681:PgpA-like superfamily	0	7	0.601667	1	0	wBm_chung_2019
IPR036737:OmpA-like domain superfamily	0	7	0.601667	1	0	wBm_chung_2019
IPR036762:IscX-like superfamily	0	7	0.601667	1	0	wBm_chung_2019
IPR036771:F0F1 ATP synthase delta/epsilon subunit, N-terminal	0	7	0.601667	1	0	wBm_chung_2019
IPR036789:Ribosomal protein L6, alpha-beta domain superfamily	0	7	0.601667	1	0	wBm_chung_2019
IPR036821:Peptide deformylase superfamily	0	7	0.601667	1	0	wBm_chung_2019
IPR036900:Alpha-D-phosphohexomutase, C-terminal domain superfamily	0	7	0.601667	1	0	wBm_chung_2019
IPR037022:Formyl transferase, C-terminal domain superfamily	0	7	0.601667	1	0	wBm_chung_2019
IPR037041:Trigger factor, C-terminal domain superfamily	0	7	0.601667	1	0	wBm_chung_2019
IPR037121:Ribosomal protein L25, C-terminal	0	7	0.601667	1	0	wBm_chung_2019
IPR037196:HSP90, C-terminal domain	0	7	0.601667	1	0	wBm_chung_2019
IPR037219:Peptidase M41-like	0	7	0.601667	1	0	wBm_chung_2019
IPR037229:Ribosomal protein L35 superfamily	0	7	0.601667	1	0	wBm_chung_2019
IPR037873:BamE-like	0	7	0.601667	1	0	wBm_chung_2019
IPR038366:Zinc finger, ClpX C4-type superfamily	0	7	0.601667	1	0	wBm_chung_2019
IPR038662:F1F0 ATP synthase subunit C superfamily	0	7	0.601667	1	0	wBm_chung_2019
IPR041711:Methionyl-tRNA formyltransferase, N-terminal domain	0	7	0.601667	1	0	wBm_chung_2019
IPR042116:GTP-binding protein TypA/BipA, C-terminal	0	7	0.601667	1	0	wBm_chung_2019
GO:0006072:glycerol-3-phosphate metabolic process	0	7	0.601667	1	0	wBm_chung_2019
GO:0006086:acetyl-CoA biosynthetic process from pyruvate	0	7	0.601667	1	0	wBm_chung_2019
GO:0006270:DNA replication initiation	0	7	0.601667	1	0	wBm_chung_2019
GO:0006750:glutathione biosynthetic process	0	7	0.601667	1	0	wBm_chung_2019
GO:0006855:drug transmembrane transport	0	7	0.601667	1	0	wBm_chung_2019
GO:0009263:deoxyribonucleotide biosynthetic process	0	7	0.601667	1	0	wBm_chung_2019
GO:0015991:ATP hydrolysis coupled proton transport	0	7	0.601667	1	0	wBm_chung_2019
GO:0016075:rRNA catabolic process	0	7	0.601667	1	0	wBm_chung_2019
GO:0030259:lipid glycosylation	0	7	0.601667	1	0	wBm_chung_2019
GO:0046168:glycerol-3-phosphate catabolic process	0	7	0.601667	1	0	wBm_chung_2019
GO:0046654:tetrahydrofolate biosynthetic process	0	7	0.601667	1	0	wBm_chung_2019
GO:0071704:organic substance metabolic process	0	7	0.601667	1	0	wBm_chung_2019
GO:0071951:conversion of methionyl-tRNA to N-formyl-methionyl-tRNA	0	7	0.601667	1	0	wBm_chung_2019
GO:0009279:cell outer membrane	0	7	0.601667	1	0	wBm_chung_2019
GO:0009331:glycerol-3-phosphate dehydrogenase complex	0	7	0.601667	1	0	wBm_chung_2019
GO:0033177:proton-transporting two-sector ATPase complex, proton-transporting domain	0	7	0.601667	1	0	wBm_chung_2019
GO:0043231:intracellular membrane-bounded organelle	0	7	0.601667	1	0	wBm_chung_2019
GO:0045281:succinate dehydrogenase complex	0	7	0.601667	1	0	wBm_chung_2019
GO:0003911:DNA ligase (NAD+) activity	0	7	0.601667	1	0	wBm_chung_2019
GO:0003937:IMP cyclohydrolase activity	0	7	0.601667	1	0	wBm_chung_2019
GO:0004044:amidophosphoribosyltransferase activity	0	7	0.601667	1	0	wBm_chung_2019
GO:0004121:cystathionine beta-lyase activity	0	7	0.601667	1	0	wBm_chung_2019
GO:0004146:dihydrofolate reductase activity	0	7	0.601667	1	0	wBm_chung_2019
GO:0004324:ferredoxin-NADP+ reductase activity	0	7	0.601667	1	0	wBm_chung_2019
GO:0004363:glutathione synthase activity	0	7	0.601667	1	0	wBm_chung_2019
GO:0004367:glycerol-3-phosphate dehydrogenase [NAD+] activity	0	7	0.601667	1	0	wBm_chung_2019
GO:0004479:methionyl-tRNA formyltransferase activity	0	7	0.601667	1	0	wBm_chung_2019
GO:0004525:ribonuclease III activity	0	7	0.601667	1	0	wBm_chung_2019
GO:0004643:phosphoribosylaminoimidazolecarboxamide formyltransferase activity	0	7	0.601667	1	0	wBm_chung_2019
GO:0004739:pyruvate dehydrogenase (acetyl-transferring) activity	0	7	0.601667	1	0	wBm_chung_2019
GO:0008097:5S rRNA binding	0	7	0.601667	1	0	wBm_chung_2019
GO:0008173:RNA methyltransferase activity	0	7	0.601667	1	0	wBm_chung_2019
GO:0008234:cysteine-type peptidase activity	0	7	0.601667	1	0	wBm_chung_2019
GO:0008681:2-octaprenyl-6-methoxyphenol hydroxylase activity	0	7	0.601667	1	0	wBm_chung_2019
GO:0008837:diaminopimelate epimerase activity	0	7	0.601667	1	0	wBm_chung_2019
GO:0008962:phosphatidylglycerophosphatase activity	0	7	0.601667	1	0	wBm_chung_2019
GO:0015238:drug transmembrane transporter activity	0	7	0.601667	1	0	wBm_chung_2019
GO:0016301:kinase activity	0	7	0.601667	1	0	wBm_chung_2019
GO:0016709:oxidoreductase activity, acting on paired donors, with incorporation or reduction of molecular oxygen, NAD(P)H as one donor, and incorporation of one atom of oxygen	0	7	0.601667	1	0	wBm_chung_2019
GO:0016758:transferase activity, transferring hexosyl groups	0	7	0.601667	1	0	wBm_chung_2019
GO:0016868:intramolecular transferase activity, phosphotransferases	0	7	0.601667	1	0	wBm_chung_2019
GO:0016881:acid-amino acid ligase activity	0	7	0.601667	1	0	wBm_chung_2019
GO:0050511:undecaprenyldiphospho-muramoylpentapeptide beta-N-acetylglucosaminyltransferase activity	0	7	0.601667	1	0	wBm_chung_2019
IPR020683:Ankyrin repeat-containing domain	3	30	0.602256	1	0.626001	wBm_chung_2019
IPR002110:Ankyrin repeat	3	29	0.602743	1	0.651302	wBm_chung_2019
IPR000760:Inositol monophosphatase-like	0	8	0.612365	1	0	wBm_chung_2019
IPR000846:Dihydrodipicolinate reductase, N-terminal	0	8	0.612365	1	0	wBm_chung_2019
IPR001059:Translation elongation factor P/YeiP, central	0	8	0.612365	1	0	wBm_chung_2019
IPR001295:Dihydroorotate dehydrogenase, conserved site	0	8	0.612365	1	0	wBm_chung_2019
IPR001328:Peptidyl-tRNA hydrolase	0	8	0.612365	1	0	wBm_chung_2019
IPR001333:Peptidase M32, carboxypeptidase Taq	0	8	0.612365	1	0	wBm_chung_2019
IPR001626:ABC transporter, TroCD-like	0	8	0.612365	1	0	wBm_chung_2019
IPR001917:Aminotransferase, class-II, pyridoxal-phosphate binding site	0	8	0.612365	1	0	wBm_chung_2019
IPR002543:FtsK domain	0	8	0.612365	1	0	wBm_chung_2019
IPR002676:RimM protein	0	8	0.612365	1	0	wBm_chung_2019
IPR002698:5-formyltetrahydrofolate cyclo-ligase	0	8	0.612365	1	0	wBm_chung_2019
IPR002828:Survival protein SurE-like phosphatase/nucleotidase	0	8	0.612365	1	0	wBm_chung_2019
IPR002915:DeoC/FbaB/ lacD aldolase	0	8	0.612365	1	0	wBm_chung_2019
IPR002935:O-methyltransferase, family 3	0	8	0.612365	1	0	wBm_chung_2019
IPR003140:Phospholipase/carboxylesterase/thioesterase	0	8	0.612365	1	0	wBm_chung_2019
IPR003156:DHHA1 domain	0	8	0.612365	1	0	wBm_chung_2019
IPR003789:Aspartyl/glutamyl-tRNA amidotransferase subunit B-related	0	8	0.612365	1	0	wBm_chung_2019
IPR003838:ABC transporter permease protein domain	0	8	0.612365	1	0	wBm_chung_2019
IPR004045:Glutathione S-transferase, N-terminal	0	8	0.612365	1	0	wBm_chung_2019
IPR004046:Glutathione S-transferase, C-terminal	0	8	0.612365	1	0	wBm_chung_2019
IPR004401:Nucleoid-associated protein YbaB/EbfC family	0	8	0.612365	1	0	wBm_chung_2019
IPR004413:Aspartyl/glutamyl-tRNA(Asn/Gln) amidotransferase, B subunit	0	8	0.612365	1	0	wBm_chung_2019
IPR004424:4-diphosphocytidyl-2C-methyl-D-erythritol kinase	0	8	0.612365	1	0	wBm_chung_2019
IPR005670:Phosphate transport system permease protein 1	0	8	0.612365	1	0	wBm_chung_2019
IPR005719:Dihydroorotate dehydrogenase, class 2	0	8	0.612365	1	0	wBm_chung_2019
IPR005720:Dihydroorotate dehydrogenase domain	0	8	0.612365	1	0	wBm_chung_2019
IPR005811:ATP-citrate lyase/succinyl-CoA ligase	0	8	0.612365	1	0	wBm_chung_2019
IPR005828:Major facilitator, sugar transporter-like	0	8	0.612365	1	0	wBm_chung_2019
IPR006075:Aspartyl/Glutamyl-tRNA(Gln) amidotransferase, subunit B/E, catalytic	0	8	0.612365	1	0	wBm_chung_2019
IPR006204:GHMP kinase N-terminal domain	0	8	0.612365	1	0	wBm_chung_2019
IPR006225:Pseudouridine synthase, RluC/RluD	0	8	0.612365	1	0	wBm_chung_2019
IPR006439:HAD hydrolase, subfamily IA	0	8	0.612365	1	0	wBm_chung_2019
IPR006885:NADH dehydrogenase ubiquinone Fe-S protein 4, mitochondrial	0	8	0.612365	1	0	wBm_chung_2019
IPR007523:NDUFAF3/Mth938 domain-containing protein	0	8	0.612365	1	0	wBm_chung_2019
IPR008146:Glutamine synthetase, catalytic domain	0	8	0.612365	1	0	wBm_chung_2019
IPR010961:Tetrapyrrole biosynthesis, 5-aminolevulinic acid synthase	0	8	0.612365	1	0	wBm_chung_2019
IPR010987:Glutathione S-transferase, C-terminal-like	0	8	0.612365	1	0	wBm_chung_2019
IPR011033:PRC-barrel-like	0	8	0.612365	1	0	wBm_chung_2019
IPR011768:Translation elongation factor P	0	8	0.612365	1	0	wBm_chung_2019
IPR011925:Lipoprotein-releasing system transmembrane protein LolC/E	0	8	0.612365	1	0	wBm_chung_2019
IPR011961:16S rRNA processing protein RimM	0	8	0.612365	1	0	wBm_chung_2019
IPR012763:DNA polymerase III, subunit gamma/ tau	0	8	0.612365	1	0	wBm_chung_2019
IPR013185:Translation elongation factor, KOW-like	0	8	0.612365	1	0	wBm_chung_2019
IPR013750:GHMP kinase, C-terminal domain	0	8	0.612365	1	0	wBm_chung_2019
IPR014312:Succinate dehydrogenase, hydrophobic membrane anchor	0	8	0.612365	1	0	wBm_chung_2019
IPR015365:Elongation factor P, C-terminal	0	8	0.612365	1	0	wBm_chung_2019
IPR016102:Succinyl-CoA synthetase-like	0	8	0.612365	1	0	wBm_chung_2019
IPR017039:Virulence factor BrkB	0	8	0.612365	1	0	wBm_chung_2019
IPR017938:Riboflavin synthase-like beta-barrel	0	8	0.612365	1	0	wBm_chung_2019
IPR017958:Glutamyl-tRNA(Gln) amidotransferase, subunit B, conserved site	0	8	0.612365	1	0	wBm_chung_2019
IPR018027:Asn/Gln amidotransferase	0	8	0.612365	1	0	wBm_chung_2019
IPR018171:Peptidyl-tRNA hydrolase, conserved site	0	8	0.612365	1	0	wBm_chung_2019
IPR018495:Succinate dehydrogenase, cytochrome b subunit, conserved site	0	8	0.612365	1	0	wBm_chung_2019
IPR018541:FtsK gamma domain	0	8	0.612365	1	0	wBm_chung_2019
IPR020599:Translation elongation factor P/YeiP	0	8	0.612365	1	0	wBm_chung_2019
IPR022107:DNA polymerase III, subunit gamma/ tau, C-terminal	0	8	0.612365	1	0	wBm_chung_2019
IPR022663:Dihydrodipicolinate reductase, C-terminal	0	8	0.612365	1	0	wBm_chung_2019
IPR022754:DNA polymerase III, gamma subunit, domain III	0	8	0.612365	1	0	wBm_chung_2019
IPR022898:Ribonuclease HII	0	8	0.612365	1	0	wBm_chung_2019
IPR023168:Aspartyl/glutamyl-tRNA(Asn/Gln) amidotransferase subunit B, C-terminal	0	8	0.612365	1	0	wBm_chung_2019
IPR023214:HAD-like domain	0	8	0.612365	1	0	wBm_chung_2019
IPR023940:Dihydrodipicolinate reductase	0	8	0.612365	1	0	wBm_chung_2019
IPR024185:5-formyltetrahydrofolate cyclo-ligase-like domain	0	8	0.612365	1	0	wBm_chung_2019
IPR024567:Ribonuclease HII/HIII domain	0	8	0.612365	1	0	wBm_chung_2019
IPR025199:DNA translocase FtsK, 4TM region	0	8	0.612365	1	0	wBm_chung_2019
IPR025857:MacB-like periplasmic core domain	0	8	0.612365	1	0	wBm_chung_2019
IPR027275:PRC-barrel domain	0	8	0.612365	1	0	wBm_chung_2019
IPR030048:Survival protein SurE	0	8	0.612365	1	0	wBm_chung_2019
IPR036282:Glutathione S-transferase, C-terminal domain superfamily	0	8	0.612365	1	0	wBm_chung_2019
IPR036412:HAD-like superfamily	0	8	0.612365	1	0	wBm_chung_2019
IPR036416:Peptidyl-tRNA hydrolase superfamily	0	8	0.612365	1	0	wBm_chung_2019
IPR036523:SurE-like phosphatase/nucleotidase superfamily	0	8	0.612365	1	0	wBm_chung_2019
IPR036554:GHMP kinase, C-terminal domain superfamily	0	8	0.612365	1	0	wBm_chung_2019
IPR036748:MTH938-like superfamily	0	8	0.612365	1	0	wBm_chung_2019
IPR036894:Nucleoid-associated protein YbaB-like domain superfamily	0	8	0.612365	1	0	wBm_chung_2019
IPR036976:RimM, N-terminal domain superfamily	0	8	0.612365	1	0	wBm_chung_2019
IPR037171:NagB/RpiA transferase-like	0	8	0.612365	1	0	wBm_chung_2019
IPR037294:ABC transporter, BtuC-like	0	8	0.612365	1	0	wBm_chung_2019
IPR038532:NADH dehydrogenase ubiquinone Fe-S protein 4-like superfamily	0	8	0.612365	1	0	wBm_chung_2019
IPR039261:Ferredoxin-NADP reductase (FNR), nucleotide-binding domain	0	8	0.612365	1	0	wBm_chung_2019
IPR040079:Glutathione Transferase family	0	8	0.612365	1	0	wBm_chung_2019
IPR041027:FtsK alpha domain	0	8	0.612365	1	0	wBm_chung_2019
IPR041492:Haloacid dehalogenase-like hydrolase	0	8	0.612365	1	0	wBm_chung_2019
IPR041720:Aldolase FbaB-like, archaeal-type	0	8	0.612365	1	0	wBm_chung_2019
IPR042114:Aspartyl/glutamyl-tRNA(Asn/Gln) amidotransferase, C-terminal, domain 1	0	8	0.612365	1	0	wBm_chung_2019
GO:0006629:lipid metabolic process	0	8	0.612365	1	0	wBm_chung_2019
GO:0042953:lipoprotein transport	0	8	0.612365	1	0	wBm_chung_2019
GO:0043043:peptide biosynthetic process	0	8	0.612365	1	0	wBm_chung_2019
GO:0046854:phosphatidylinositol phosphorylation	0	8	0.612365	1	0	wBm_chung_2019
GO:0003870:5-aminolevulinate synthase activity	0	8	0.612365	1	0	wBm_chung_2019
GO:0004045:aminoacyl-tRNA hydrolase activity	0	8	0.612365	1	0	wBm_chung_2019
GO:0004152:dihydroorotate dehydrogenase activity	0	8	0.612365	1	0	wBm_chung_2019
GO:0004181:metallocarboxypeptidase activity	0	8	0.612365	1	0	wBm_chung_2019
GO:0004332:fructose-bisphosphate aldolase activity	0	8	0.612365	1	0	wBm_chung_2019
GO:0004356:glutamate-ammonia ligase activity	0	8	0.612365	1	0	wBm_chung_2019
GO:0008171:O-methyltransferase activity	0	8	0.612365	1	0	wBm_chung_2019
GO:0008252:nucleotidase activity	0	8	0.612365	1	0	wBm_chung_2019
GO:0008839:4-hydroxy-tetrahydrodipicolinate reductase	0	8	0.612365	1	0	wBm_chung_2019
GO:0016884:carbon-nitrogen ligase activity, with glutamine as amido-N-donor	0	8	0.612365	1	0	wBm_chung_2019
GO:0042954:lipoprotein transporter activity	0	8	0.612365	1	0	wBm_chung_2019
GO:0043022:ribosome binding	0	8	0.612365	1	0	wBm_chung_2019
GO:0050515:4-(cytidine 5'-diphospho)-2-C-methyl-D-erythritol kinase activity	0	8	0.612365	1	0	wBm_chung_2019
GO:0008033:tRNA processing	6	33	0.613317	1	1.29282	wBm_chung_2019
GO:0000049:tRNA binding	6	33	0.613317	1	1.29282	wBm_chung_2019
IPR000223:Peptidase S26A, signal peptidase I	2	9	0.628772	1	1.65131	wBm_chung_2019
IPR000305:GIY-YIG nuclease superfamily	2	9	0.628772	1	1.65131	wBm_chung_2019
IPR001564:Nucleoside diphosphate kinase	2	9	0.628772	1	1.65131	wBm_chung_2019
IPR002205:DNA topoisomerase, type IIA, subunit A/C-terminal	2	9	0.628772	1	1.65131	wBm_chung_2019
IPR003170:UDP-N-acetylenolpyruvoylglucosamine reductase	2	9	0.628772	1	1.65131	wBm_chung_2019
IPR005743:DNA gyrase, subunit A	2	9	0.628772	1	1.65131	wBm_chung_2019
IPR006094:FAD linked oxidase, N-terminal	2	9	0.628772	1	1.65131	wBm_chung_2019
IPR006691:DNA gyrase/topoisomerase IV, subunit A, C-terminal beta-pinwheel	2	9	0.628772	1	1.65131	wBm_chung_2019
IPR009073:Co-chaperone HscB, C-terminal oligomerisation domain	2	9	0.628772	1	1.65131	wBm_chung_2019
IPR011601:UDP-N-acetylenolpyruvoylglucosamine reductase, C-terminal	2	9	0.628772	1	1.65131	wBm_chung_2019
IPR013757:Type IIA DNA topoisomerase subunit A, alpha-helical domain	2	9	0.628772	1	1.65131	wBm_chung_2019
IPR013758:DNA topoisomerase, type IIA, subunit A/ C-terminal, alpha-beta	2	9	0.628772	1	1.65131	wBm_chung_2019
IPR015927:Peptidase S24/S26A/S26B/S26C	2	9	0.628772	1	1.65131	wBm_chung_2019
IPR016166:FAD-binding, type 2	2	9	0.628772	1	1.65131	wBm_chung_2019
IPR016167:FAD-binding, type 2, subdomain 1	2	9	0.628772	1	1.65131	wBm_chung_2019
IPR019756:Peptidase S26A, signal peptidase I, serine active site	2	9	0.628772	1	1.65131	wBm_chung_2019
IPR019757:Peptidase S26A, signal peptidase I, lysine active site	2	9	0.628772	1	1.65131	wBm_chung_2019
IPR019758:Peptidase S26A, signal peptidase I, conserved site	2	9	0.628772	1	1.65131	wBm_chung_2019
IPR023005:Nucleoside diphosphate kinase, active site	2	9	0.628772	1	1.65131	wBm_chung_2019
IPR034907:Nucleoside diphosphate kinase-like domain	2	9	0.628772	1	1.65131	wBm_chung_2019
IPR035516:DNA gyrase/topoisomerase IV, subunit A, C-terminal	2	9	0.628772	1	1.65131	wBm_chung_2019
IPR035901:GIY-YIG endonuclease superfamily	2	9	0.628772	1	1.65131	wBm_chung_2019
IPR036286:LexA/Signal peptidase-like superfamily	2	9	0.628772	1	1.65131	wBm_chung_2019
IPR036386:HscB, C-terminal domain superfamily	2	9	0.628772	1	1.65131	wBm_chung_2019
IPR036635:UDP-N-acetylenolpyruvoylglucosamine reductase, C-terminal domain superfamily	2	9	0.628772	1	1.65131	wBm_chung_2019
IPR036850:Nucleoside diphosphate kinase-like domain superfamily	2	9	0.628772	1	1.65131	wBm_chung_2019
GO:0006165:nucleoside diphosphate phosphorylation	2	9	0.628772	1	1.65131	wBm_chung_2019
GO:0006183:GTP biosynthetic process	2	9	0.628772	1	1.65131	wBm_chung_2019
GO:0006228:UTP biosynthetic process	2	9	0.628772	1	1.65131	wBm_chung_2019
GO:0015937:coenzyme A biosynthetic process	2	9	0.628772	1	1.65131	wBm_chung_2019
GO:0004550:nucleoside diphosphate kinase activity	2	9	0.628772	1	1.65131	wBm_chung_2019
GO:0008762:UDP-N-acetylmuramate dehydrogenase activity	2	9	0.628772	1	1.65131	wBm_chung_2019
GO:0016788:hydrolase activity, acting on ester bonds	2	9	0.628772	1	1.65131	wBm_chung_2019
GO:0003676:nucleic acid binding	15	92	0.637136	1	1.13933	wBm_chung_2019
GO:0003723:RNA binding	12	93	0.638712	1	0.828438	wBm_chung_2019
GO:0016874:ligase activity	7	39	0.640434	1	1.27469	wBm_chung_2019
GO:0000287:magnesium ion binding	7	40	0.645125	1	1.23373	wBm_chung_2019
IPR000031:PurE domain	2	10	0.648971	1	1.44261	wBm_chung_2019
IPR001943:UVR domain	2	10	0.648971	1	1.44261	wBm_chung_2019
IPR002052:DNA methylase, N-6 adenine-specific, conserved site	2	10	0.648971	1	1.44261	wBm_chung_2019
IPR005133:Na+/H+ antiporter subunit G	2	10	0.648971	1	1.44261	wBm_chung_2019
IPR007127:RNA polymerase sigma factor 70, region 1.1	2	10	0.648971	1	1.44261	wBm_chung_2019
IPR007182:Na+/H+ antiporter MnhB subunit-related protein	2	10	0.648971	1	1.44261	wBm_chung_2019
IPR007624:RNA polymerase sigma-70 region 3	2	10	0.648971	1	1.44261	wBm_chung_2019
IPR007631:RNA polymerase sigma factor 70, non-essential domain	2	10	0.648971	1	1.44261	wBm_chung_2019
IPR008909:DALR anticodon binding	2	10	0.648971	1	1.44261	wBm_chung_2019
IPR011005:Dihydropteroate synthase-like	2	10	0.648971	1	1.44261	wBm_chung_2019
IPR024694:PurE, prokaryotic type	2	10	0.648971	1	1.44261	wBm_chung_2019
IPR025383:Domain of unknown function DUF4040	2	10	0.648971	1	1.44261	wBm_chung_2019
IPR028630:RNA polymerase sigma factor RpoD	2	10	0.648971	1	1.44261	wBm_chung_2019
IPR030470:UbiA prenyltransferase conserved site	2	10	0.648971	1	1.44261	wBm_chung_2019
IPR033747:Class I PurE	2	10	0.648971	1	1.44261	wBm_chung_2019
IPR035893:PurE domain superfamily	2	10	0.648971	1	1.44261	wBm_chung_2019
IPR036876:UVR domain superfamily	2	10	0.648971	1	1.44261	wBm_chung_2019
GO:0006420:arginyl-tRNA aminoacylation	2	10	0.648971	1	1.44261	wBm_chung_2019
GO:0006605:protein targeting	2	10	0.648971	1	1.44261	wBm_chung_2019
GO:0008652:cellular amino acid biosynthetic process	2	10	0.648971	1	1.44261	wBm_chung_2019
GO:0015672:monovalent inorganic cation transport	2	10	0.648971	1	1.44261	wBm_chung_2019
GO:0004190:aspartic-type endopeptidase activity	2	10	0.648971	1	1.44261	wBm_chung_2019
GO:0004814:arginine-tRNA ligase activity	2	10	0.648971	1	1.44261	wBm_chung_2019
GO:0005451:monovalent cation:proton antiporter activity	2	10	0.648971	1	1.44261	wBm_chung_2019
GO:0008236:serine-type peptidase activity	2	10	0.648971	1	1.44261	wBm_chung_2019
GO:0006457:protein folding	7	41	0.651137	1	1.19514	wBm_chung_2019
GO:0003924:GTPase activity	7	41	0.651137	1	1.19514	wBm_chung_2019
No GO terms for molecular function	14	107	0.656291	1	0.840261	wBm_chung_2019
IPR014721:Ribosomal protein S5 domain 2-type fold, subgroup	5	44	0.661106	1	0.721134	wBm_chung_2019
IPR003439:ABC transporter-like	8	46	0.665678	1	1.22644	wBm_chung_2019
IPR002099:DNA mismatch repair protein family	2	11	0.671481	1	1.28023	wBm_chung_2019
IPR002562:3'-5' exonuclease domain	2	11	0.671481	1	1.28023	wBm_chung_2019
IPR004136:Nitronate monooxygenase	2	11	0.671481	1	1.28023	wBm_chung_2019
IPR009014:Transketolase C-terminal/Pyruvate-ferredoxin oxidoreductase domain II	2	11	0.671481	1	1.28023	wBm_chung_2019
IPR011032:GroES-like	2	11	0.671481	1	1.28023	wBm_chung_2019
IPR013507:DNA mismatch repair protein, C-terminal	2	11	0.671481	1	1.28023	wBm_chung_2019
IPR014762:DNA mismatch repair, conserved site	2	11	0.671481	1	1.28023	wBm_chung_2019
IPR014790:MutL, C-terminal, dimerisation	2	11	0.671481	1	1.28023	wBm_chung_2019
IPR018145:CagE, TrbE, VirB component of type IV transporter system, central domain	2	11	0.671481	1	1.28023	wBm_chung_2019
IPR020667:DNA mismatch repair protein, MutL	2	11	0.671481	1	1.28023	wBm_chung_2019
IPR033248:Transketolase, C-terminal domain	2	11	0.671481	1	1.28023	wBm_chung_2019
IPR035911:MurE/MurF, N-terminal	2	11	0.671481	1	1.28023	wBm_chung_2019
IPR037198:MutL, C-terminal domain superfamily	2	11	0.671481	1	1.28023	wBm_chung_2019
IPR042120:MutL, C-terminal domain, dimerisation subdomain	2	11	0.671481	1	1.28023	wBm_chung_2019
IPR042121:MutL, C-terminal domain, regulatory subdomain	2	11	0.671481	1	1.28023	wBm_chung_2019
GO:0003697:single-stranded DNA binding	2	11	0.671481	1	1.28023	wBm_chung_2019
GO:0004177:aminopeptidase activity	2	11	0.671481	1	1.28023	wBm_chung_2019
GO:0008235:metalloexopeptidase activity	2	11	0.671481	1	1.28023	wBm_chung_2019
GO:0016810:hydrolase activity, acting on carbon-nitrogen (but not peptide) bonds	2	11	0.671481	1	1.28023	wBm_chung_2019
GO:0018580:nitronate monooxygenase activity	2	11	0.671481	1	1.28023	wBm_chung_2019
IPR000537:UbiA prenyltransferase family	2	12	0.695174	1	1.15024	wBm_chung_2019
IPR016174:Di-haem cytochrome, transmembrane	2	12	0.695174	1	1.15024	wBm_chung_2019
GO:0006259:DNA metabolic process	2	12	0.695174	1	1.15024	wBm_chung_2019
GO:0006779:porphyrin-containing compound biosynthetic process	2	12	0.695174	1	1.15024	wBm_chung_2019
GO:0042026:protein refolding	2	12	0.695174	1	1.15024	wBm_chung_2019
GO:0050661:NADP binding	2	12	0.695174	1	1.15024	wBm_chung_2019
IPR012337:Ribonuclease H-like domain	7	57	0.697703	1	0.787777	wBm_chung_2019
IPR036249:Thioredoxin-like superfamily	7	56	0.697975	1	0.805452	wBm_chung_2019
IPR000994:Peptidase M24	1	13	0.703426	1	0.472947	wBm_chung_2019
IPR010978:tRNA-binding arm	1	13	0.703426	1	0.472947	wBm_chung_2019
IPR010979:Ribosomal protein S13-like, H2TH	1	13	0.703426	1	0.472947	wBm_chung_2019
IPR012338:Beta-lactamase/transpeptidase-like	1	13	0.703426	1	0.472947	wBm_chung_2019
IPR013317:Chromosomal replication initiator protein DnaA	1	13	0.703426	1	0.472947	wBm_chung_2019
IPR036005:Creatinase/aminopeptidase-like	1	13	0.703426	1	0.472947	wBm_chung_2019
GO:0006520:cellular amino acid metabolic process	1	13	0.703426	1	0.472947	wBm_chung_2019
GO:0009408:response to heat	1	13	0.703426	1	0.472947	wBm_chung_2019
GO:0016310:phosphorylation	1	13	0.703426	1	0.472947	wBm_chung_2019
GO:0048037:cofactor binding	1	13	0.703426	1	0.472947	wBm_chung_2019
IPR007863:Peptidase M16, C-terminal	1	14	0.705318	1	0.435774	wBm_chung_2019
IPR010258:Conjugal transfer, TrbG/VirB9/CagX	1	14	0.705318	1	0.435774	wBm_chung_2019
IPR011129:Cold shock domain	1	14	0.705318	1	0.435774	wBm_chung_2019
IPR011249:Metalloenzyme, LuxS/M16 peptidase-like	1	14	0.705318	1	0.435774	wBm_chung_2019
IPR011607:Methylglyoxal synthase-like domain	1	14	0.705318	1	0.435774	wBm_chung_2019
IPR011765:Peptidase M16, N-terminal	1	14	0.705318	1	0.435774	wBm_chung_2019
IPR014148:P-type conjugative transfer protein VirB9	1	14	0.705318	1	0.435774	wBm_chung_2019
IPR029044:Nucleotide-diphospho-sugar transferases	1	14	0.705318	1	0.435774	wBm_chung_2019
IPR029045:ClpP/crotonase-like domain	1	14	0.705318	1	0.435774	wBm_chung_2019
IPR033645:VirB9/CagX/TrbG, C-terminal	1	14	0.705318	1	0.435774	wBm_chung_2019
IPR036390:Winged helix DNA-binding domain superfamily	1	14	0.705318	1	0.435774	wBm_chung_2019
IPR036914:Methylglyoxal synthase-like domain superfamily	1	14	0.705318	1	0.435774	wBm_chung_2019
IPR038161:VirB9/CagX/TrbG, C-terminal domain superfamily	1	14	0.705318	1	0.435774	wBm_chung_2019
GO:0006432:phenylalanyl-tRNA aminoacylation	1	14	0.705318	1	0.435774	wBm_chung_2019
GO:0004826:phenylalanine-tRNA ligase activity	1	14	0.705318	1	0.435774	wBm_chung_2019
GO:0046983:protein dimerization activity	1	14	0.705318	1	0.435774	wBm_chung_2019
IPR001017:Dehydrogenase, E1 component	1	15	0.710496	1	0.403912	wBm_chung_2019
IPR001789:Signal transduction response regulator, receiver domain	1	15	0.710496	1	0.403912	wBm_chung_2019
IPR002376:Formyl transferase, N-terminal	1	15	0.710496	1	0.403912	wBm_chung_2019
IPR002634:BolA protein	1	15	0.710496	1	0.403912	wBm_chung_2019
IPR010994:RuvA domain 2-like	1	15	0.710496	1	0.403912	wBm_chung_2019
IPR011006:CheY-like superfamily	1	15	0.710496	1	0.403912	wBm_chung_2019
IPR036065:BolA-like superfamily	1	15	0.710496	1	0.403912	wBm_chung_2019
IPR036477:Formyl transferase, N-terminal domain superfamily	1	15	0.710496	1	0.403912	wBm_chung_2019
GO:0000160:phosphorelay signal transduction system	1	15	0.710496	1	0.403912	wBm_chung_2019
GO:0004523:RNA-DNA hybrid ribonuclease activity	1	15	0.710496	1	0.403912	wBm_chung_2019
GO:0016624:oxidoreductase activity, acting on the aldehyde or oxo group of donors, disulfide as acceptor	1	15	0.710496	1	0.403912	wBm_chung_2019
GO:0016742:hydroxymethyl-, formyl- and related transferase activity	1	15	0.710496	1	0.403912	wBm_chung_2019
GO:0006241:CTP biosynthetic process	3	16	0.71837	1	1.33379	wBm_chung_2019
GO:0006298:mismatch repair	3	16	0.71837	1	1.33379	wBm_chung_2019
GO:0030983:mismatched DNA binding	3	16	0.71837	1	1.33379	wBm_chung_2019
GO:0055085:transmembrane transport	11	68	0.719553	1	1.12096	wBm_chung_2019
IPR003029:S1 domain	3	17	0.72839	1	1.23634	wBm_chung_2019
IPR008925:Aminoacyl-tRNA synthetase, class I, anticodon-binding	3	17	0.72839	1	1.23634	wBm_chung_2019
IPR020751:Aminoacyl-tRNA synthetase, class I, anticodon-binding domain, subdomain 2	3	17	0.72839	1	1.23634	wBm_chung_2019
IPR039554:HigA2-like, helix-turn-helix domain	3	17	0.72839	1	1.23634	wBm_chung_2019
GO:0008360:regulation of cell shape	3	17	0.72839	1	1.23634	wBm_chung_2019
IPR000184:Bacterial surface antigen (D15)	13	81	0.73873	1	1.11192	wBm_chung_2019
IPR010827:POTRA domain, BamA/TamA-like	13	81	0.73873	1	1.11192	wBm_chung_2019
IPR023707:Outer membrane protein assembly factor BamA	13	81	0.73873	1	1.11192	wBm_chung_2019
GO:0071709:membrane assembly	13	81	0.73873	1	1.11192	wBm_chung_2019
IPR001584:Integrase, catalytic core	3	18	0.740052	1	1.15187	wBm_chung_2019
IPR013026:Tetratricopeptide repeat-containing domain	3	18	0.740052	1	1.15187	wBm_chung_2019
IPR019734:Tetratricopeptide repeat	3	18	0.740052	1	1.15187	wBm_chung_2019
IPR036869:Chaperone J-domain superfamily	3	18	0.740052	1	1.15187	wBm_chung_2019
GO:0009231:riboflavin biosynthetic process	3	18	0.740052	1	1.15187	wBm_chung_2019
GO:0042626:ATPase activity, coupled to transmembrane movement of substances	3	18	0.740052	1	1.15187	wBm_chung_2019
GO:0051537:2 iron, 2 sulfur cluster binding	3	18	0.740052	1	1.15187	wBm_chung_2019
IPR000640:Translation elongation factor EFG, V domain	3	19	0.752909	1	1.07801	wBm_chung_2019
IPR005475:Transketolase-like, pyrimidine-binding domain	3	19	0.752909	1	1.07801	wBm_chung_2019
IPR011701:Major facilitator superfamily	3	19	0.752909	1	1.07801	wBm_chung_2019
IPR035647:EF-G domain III/V-like	3	19	0.752909	1	1.07801	wBm_chung_2019
GO:0006289:nucleotide-excision repair	3	19	0.752909	1	1.07801	wBm_chung_2019
GO:0016114:terpenoid biosynthetic process	3	19	0.752909	1	1.07801	wBm_chung_2019
IPR016169:CO dehydrogenase flavoprotein-like, FAD-binding, subdomain 2	2	20	0.753307	1	0.630022	wBm_chung_2019
IPR029058:Alpha/Beta hydrolase fold	2	20	0.753307	1	0.630022	wBm_chung_2019
IPR036318:FAD-binding, type PCMH-like superfamily	2	20	0.753307	1	0.630022	wBm_chung_2019
No InterPro entry	2	20	0.753307	1	0.630022	wBm_chung_2019
GO:0022900:electron transport chain	2	20	0.753307	1	0.630022	wBm_chung_2019
IPR013766:Thioredoxin domain	2	21	0.754899	1	0.595767	wBm_chung_2019
IPR003593:AAA+ ATPase domain	13	96	0.758027	1	0.882625	wBm_chung_2019
IPR011990:Tetratricopeptide-like helical domain	4	23	0.763501	1	1.21647	wBm_chung_2019
IPR014722:Ribosomal protein L2 domain 2	4	23	0.763501	1	1.21647	wBm_chung_2019
GO:0006812:cation transport	4	23	0.763501	1	1.21647	wBm_chung_2019
GO:0016226:iron-sulfur cluster assembly	4	23	0.763501	1	1.21647	wBm_chung_2019
GO:0008324:cation transmembrane transporter activity	4	23	0.763501	1	1.21647	wBm_chung_2019
GO:0051301:cell division	4	24	0.770017	1	1.15354	wBm_chung_2019
GO:0006412:translation	19	120	0.775756	1	1.09886	wBm_chung_2019
GO:0015074:DNA integration	4	25	0.777688	1	1.09667	wBm_chung_2019
GO:0005886:plasma membrane	4	25	0.777688	1	1.09667	wBm_chung_2019
GO:0003677:DNA binding	20	126	0.779719	1	1.10422	wBm_chung_2019
IPR036259:MFS transporter superfamily	3	26	0.783833	1	0.740392	wBm_chung_2019
IPR020846:Major facilitator superfamily domain	3	27	0.783848	1	0.708224	wBm_chung_2019
GO:0006364:rRNA processing	3	28	0.785259	1	0.678626	wBm_chung_2019
GO:0015031:protein transport	3	28	0.785259	1	0.678626	wBm_chung_2019
IPR016185:Pre-ATP-grasp domain	5	29	0.787939	1	1.20562	wBm_chung_2019
GO:0006164:purine nucleotide biosynthetic process	5	29	0.787939	1	1.20562	wBm_chung_2019
GO:0006313:transposition, DNA-mediated	5	30	0.791757	1	1.15525	wBm_chung_2019
GO:0004803:transposase activity	5	30	0.791757	1	1.15525	wBm_chung_2019
GO:0004222:metalloendopeptidase activity	5	31	0.796574	1	1.10882	wBm_chung_2019
IPR011761:ATP-grasp fold	5	32	0.802253	1	1.06575	wBm_chung_2019
IPR027417:P-loop containing nucleoside triphosphate hydrolase	27	173	0.802367	1	1.08497	wBm_chung_2019
GO:0006189:'de novo' IMP biosynthetic process	4	33	0.80466	1	0.782393	wBm_chung_2019
IPR029062:Class I glutamine amidotransferase-like	6	36	0.808446	1	1.15699	wBm_chung_2019
IPR017871:ABC transporter, conserved site	6	38	0.815355	1	1.08064	wBm_chung_2019
GO:0020037:heme binding	7	45	0.829509	1	1.06121	wBm_chung_2019
GO:0009058:biosynthetic process	8	51	0.83788	1	1.0734	wBm_chung_2019
IPR020568:Ribosomal protein S5 domain 2-type fold	7	53	0.842006	1	0.863086	wBm_chung_2019
GO:0046872:metal ion binding	10	74	0.862456	1	0.884356	wBm_chung_2019
IPR034746:POTRA domain	13	83	0.868448	1	1.07567	wBm_chung_2019
GO:0019867:outer membrane	13	85	0.870625	1	1.04143	wBm_chung_2019
GO:0005840:ribosome	17	110	0.882847	1	1.05919	wBm_chung_2019
GO:0003824:catalytic activity	22	154	0.896899	1	0.943006	wBm_chung_2019
No GO terms for cellular component	45	298	0.911416	1	1.03869	wBm_chung_2019
IPR000014:PAS domain	0	1	1	1	0	wBm_chung_2019
IPR000037:SsrA-binding protein	1	7	1	1	0.955734	wBm_chung_2019
IPR000073:Alpha/beta hydrolase fold-1	1	6	1	1	1.14865	wBm_chung_2019
IPR000085:Bacterial DNA recombination protein RuvA	0	4	1	1	0	wBm_chung_2019
IPR000086:NUDIX hydrolase domain	1	7	1	1	0.955734	wBm_chung_2019
IPR000119:Histone-like DNA-binding protein	1	10	1	1	0.633957	wBm_chung_2019
IPR000121:PEP-utilising enzyme, C-terminal	0	5	1	1	0	wBm_chung_2019
IPR000160:GGDEF domain	0	5	1	1	0	wBm_chung_2019
IPR000178:Translation initiation factor aIF-2, bacterial-like	1	8	1	1	0.817869	wBm_chung_2019
IPR000192:Aminotransferase class V domain	1	10	1	1	0.633957	wBm_chung_2019
IPR000194:ATPase, F1/V1/A1 complex, alpha/beta subunit, nucleotide-binding domain	2	15	1	1	0.880246	wBm_chung_2019
IPR000206:Ribosomal protein L7/L12	1	7	1	1	0.955734	wBm_chung_2019
IPR000214:Zinc finger, DNA glycosylase/AP lyase-type	1	7	1	1	0.955734	wBm_chung_2019
IPR000238:Ribosome-binding factor A	1	8	1	1	0.817869	wBm_chung_2019
IPR000257:Uroporphyrinogen decarboxylase (URO-D)	0	5	1	1	0	wBm_chung_2019
IPR000271:Ribosomal protein L34	1	7	1	1	0.955734	wBm_chung_2019
IPR000283:NADH:ubiquinone oxidoreductase, 75kDa subunit, conserved site	1	6	1	1	1.14865	wBm_chung_2019
IPR000297:Peptidyl-prolyl cis-trans isomerase, PpiC-type	1	6	1	1	1.14865	wBm_chung_2019
IPR000298:Cytochrome c oxidase-like subunit III	0	5	1	1	0	wBm_chung_2019
IPR000307:Ribosomal protein S16	1	6	1	1	1.14865	wBm_chung_2019
IPR000330:SNF2-related, N-terminal domain	0	2	1	1	0	wBm_chung_2019
IPR000362:Fumarate lyase family	2	13	1	1	1.04392	wBm_chung_2019
IPR000383:Xaa-Pro dipeptidyl-peptidase-like domain	1	6	1	1	1.14865	wBm_chung_2019
IPR000390:Small multidrug resistance protein family	0	1	1	1	0	wBm_chung_2019
IPR000432:DNA mismatch repair protein MutS, C-terminal	1	6	1	1	1.14865	wBm_chung_2019
IPR000456:Ribosomal protein L17	0	5	1	1	0	wBm_chung_2019
IPR000462:CDP-alcohol phosphatidyltransferase	2	15	1	1	0.880246	wBm_chung_2019
IPR000489:Pterin-binding domain	0	5	1	1	0	wBm_chung_2019
IPR000523:Magnesium chelatase ChlI domain	0	1	1	1	0	wBm_chung_2019
IPR000529:Ribosomal protein S6	1	7	1	1	0.955734	wBm_chung_2019
IPR000534:Semialdehyde dehydrogenase, NAD-binding	1	6	1	1	1.14865	wBm_chung_2019
IPR000544:Octanoyltransferase	0	4	1	1	0	wBm_chung_2019
IPR000550:7,8-Dihydro-6-hydroxymethylpterin-pyrophosphokinase, HPPK	0	5	1	1	0	wBm_chung_2019
IPR000551:MerR-type HTH domain	0	1	1	1	0	wBm_chung_2019
IPR000573:Aconitase A/isopropylmalate dehydratase small subunit, swivel domain	1	6	1	1	1.14865	wBm_chung_2019
IPR000587:Creatinase, N-terminal	1	6	1	1	1.14865	wBm_chung_2019
IPR000597:Ribosomal protein L3	1	7	1	1	0.955734	wBm_chung_2019
IPR000620:EamA domain	0	2	1	1	0	wBm_chung_2019
IPR000642:Peptidase M41	0	3	1	1	0	wBm_chung_2019
IPR000711:ATPase, OSCP/delta subunit	1	6	1	1	1.14865	wBm_chung_2019
IPR000715:Glycosyl transferase, family 4	1	8	1	1	0.817869	wBm_chung_2019
IPR000722:RNA polymerase, alpha subunit	0	5	1	1	0	wBm_chung_2019
IPR000754:Ribosomal protein S9	0	5	1	1	0	wBm_chung_2019
IPR000793:ATP synthase, alpha subunit, C-terminal	1	6	1	1	1.14865	wBm_chung_2019
IPR000795:Transcription factor, GTP-binding domain	4	26	1	1	1.04489	wBm_chung_2019
IPR000829:DAGK family	0	2	1	1	0	wBm_chung_2019
IPR000836:Phosphoribosyltransferase domain	2	18	1	1	0.711361	wBm_chung_2019
IPR000849:Sugar phosphate transporter	0	2	1	1	0	wBm_chung_2019
IPR000850:Adenylate kinase/UMP-CMP kinase	0	4	1	1	0	wBm_chung_2019
IPR000866:Alkyl hydroperoxide reductase subunit C/ Thiol specific antioxidant	2	15	1	1	0.880246	wBm_chung_2019
IPR000883:Cytochrome c oxidase subunit I	1	7	1	1	0.955734	wBm_chung_2019
IPR000911:Ribosomal protein L11/L12	1	7	1	1	0.955734	wBm_chung_2019
IPR000924:Glutamyl/glutaminyl-tRNA synthetase	2	13	1	1	1.04392	wBm_chung_2019
IPR000943:RNA polymerase sigma-70	2	18	1	1	0.711361	wBm_chung_2019
IPR000962:Zinc finger, DksA/TraR C4-type	1	7	1	1	0.955734	wBm_chung_2019
IPR001030:Aconitase/3-isopropylmalate dehydratase large subunit, alpha/beta/alpha domain	1	6	1	1	1.14865	wBm_chung_2019
IPR001041:2Fe-2S ferredoxin-type iron-sulfur binding domain	2	16	1	1	0.815911	wBm_chung_2019
IPR001062:Transcription antitermination protein, NusG	1	7	1	1	0.955734	wBm_chung_2019
IPR001085:Serine hydroxymethyltransferase	0	5	1	1	0	wBm_chung_2019
IPR001098:DNA-directed DNA polymerase, family A, palm domain	1	9	1	1	0.714431	wBm_chung_2019
IPR001114:Adenylosuccinate synthetase	1	8	1	1	0.817869	wBm_chung_2019
IPR001130:TatD family	1	7	1	1	0.955734	wBm_chung_2019
IPR001135:NADH-quinone oxidoreductase, subunit D	1	7	1	1	0.955734	wBm_chung_2019
IPR001173:Glycosyltransferase 2-like	0	1	1	1	0	wBm_chung_2019
IPR001182:Probable peptidoglycan glycosyltransferase FtsW/RodA	0	5	1	1	0	wBm_chung_2019
IPR001207:Transposase, mutator type	0	2	1	1	0	wBm_chung_2019
IPR001208:MCM domain	0	1	1	1	0	wBm_chung_2019
IPR001228:2-C-methyl-D-erythritol 4-phosphate cytidylyltransferase	0	5	1	1	0	wBm_chung_2019
IPR001238:DNA-binding, RecF	0	3	1	1	0	wBm_chung_2019
IPR001269:tRNA-dihydrouridine synthase	1	7	1	1	0.955734	wBm_chung_2019
IPR001278:Arginine-tRNA ligase	1	7	1	1	0.955734	wBm_chung_2019
IPR001279:Metallo-beta-lactamase	1	7	1	1	0.955734	wBm_chung_2019
IPR001296:Glycosyl transferase, family 1	0	2	1	1	0	wBm_chung_2019
IPR001303:Class II aldolase/adducin N-terminal	0	3	1	1	0	wBm_chung_2019
IPR001305:Heat shock protein DnaJ, cysteine-rich domain	1	6	1	1	1.14865	wBm_chung_2019
IPR001341:Aspartate kinase domain	1	6	1	1	1.14865	wBm_chung_2019
IPR001353:Proteasome, subunit alpha/beta	1	9	1	1	0.714431	wBm_chung_2019
IPR001383:Ribosomal protein L28	0	2	1	1	0	wBm_chung_2019
IPR001405:RadC protein	0	4	1	1	0	wBm_chung_2019
IPR001431:Peptidase M16, zinc-binding site	0	5	1	1	0	wBm_chung_2019
IPR001437:Transcription elongation factor, GreA/GreB, C-terminal	1	6	1	1	1.14865	wBm_chung_2019
IPR001451:Hexapeptide repeat	2	13	1	1	1.04392	wBm_chung_2019
IPR001460:Penicillin-binding protein, transpeptidase	1	9	1	1	0.714431	wBm_chung_2019
IPR001463:Sodium:alanine symporter	2	16	1	1	0.815911	wBm_chung_2019
IPR001478:PDZ domain	2	14	1	1	0.955257	wBm_chung_2019
IPR001505:Copper centre Cu(A)	1	7	1	1	0.955734	wBm_chung_2019
IPR001509:NAD-dependent epimerase/dehydratase	0	5	1	1	0	wBm_chung_2019
IPR001576:Phosphoglycerate kinase	1	7	1	1	0.955734	wBm_chung_2019
IPR001585:Transaldolase/Fructose-6-phosphate aldolase	1	7	1	1	0.955734	wBm_chung_2019
IPR001597:Aromatic amino acid beta-eliminating lyase/threonine aldolase	0	2	1	1	0	wBm_chung_2019
IPR001623:DnaJ domain	2	13	1	1	1.04392	wBm_chung_2019
IPR001636:Phosphoribosylaminoimidazole-succinocarboxamide synthase	1	6	1	1	1.14865	wBm_chung_2019
IPR001640:Prolipoprotein diacylglyceryl transferase	1	7	1	1	0.955734	wBm_chung_2019
IPR001648:Ribosomal protein S18	1	7	1	1	0.955734	wBm_chung_2019
IPR001705:Ribosomal protein L33	1	7	1	1	0.955734	wBm_chung_2019
IPR001714:Peptidase M24, methionine aminopeptidase	1	8	1	1	0.817869	wBm_chung_2019
IPR001732:UDP-glucose/GDP-mannose dehydrogenase, N-terminal	0	2	1	1	0	wBm_chung_2019
IPR001783:Lumazine-binding protein	0	2	1	1	0	wBm_chung_2019
IPR001787:Ribosomal protein L21	1	9	1	1	0.714431	wBm_chung_2019
IPR001790:Ribosomal protein L10P	1	7	1	1	0.955734	wBm_chung_2019
IPR001848:Ribosomal protein S10	1	7	1	1	0.955734	wBm_chung_2019
IPR001872:Peptidase A8, signal peptidase II	1	8	1	1	0.817869	wBm_chung_2019
IPR001882:Biotin-binding site	0	4	1	1	0	wBm_chung_2019
IPR001891:Malic oxidoreductase	1	6	1	1	1.14865	wBm_chung_2019
IPR001912:Ribosomal protein S4/S9, N-terminal	1	7	1	1	0.955734	wBm_chung_2019
IPR001915:Peptidase M48	1	6	1	1	1.14865	wBm_chung_2019
IPR001940:Peptidase S1C	1	8	1	1	0.817869	wBm_chung_2019
IPR001967:Peptidase S11, D-alanyl-D-alanine carboxypeptidase A, N-terminal	0	4	1	1	0	wBm_chung_2019
IPR001972:Stomatin family	1	8	1	1	0.817869	wBm_chung_2019
IPR001977:Dephospho-CoA kinase	0	4	1	1	0	wBm_chung_2019
IPR001986:Enolpyruvate transferase domain	1	8	1	1	0.817869	wBm_chung_2019
IPR001991:Sodium:dicarboxylate symporter	1	6	1	1	1.14865	wBm_chung_2019
IPR002020:Citrate synthase	1	7	1	1	0.955734	wBm_chung_2019
IPR002023:NADH-quinone oxidoreductase subunit E-like	1	6	1	1	1.14865	wBm_chung_2019
IPR002024:Bacterioferritin	0	2	1	1	0	wBm_chung_2019
IPR002033:Sec-independent periplasmic protein translocase TatC	1	6	1	1	1.14865	wBm_chung_2019
IPR002082:Aspartate carbamoyltransferase	1	6	1	1	1.14865	wBm_chung_2019
IPR002104:Integrase, catalytic domain	1	10	1	1	0.633957	wBm_chung_2019
IPR002109:Glutaredoxin	2	16	1	1	0.815911	wBm_chung_2019
IPR002123:Phospholipid/glycerol acyltransferase	1	7	1	1	0.955734	wBm_chung_2019
IPR002125:Cytidine and deoxycytidylate deaminases, zinc-binding	1	8	1	1	0.817869	wBm_chung_2019
IPR002133:S-adenosylmethionine synthetase	0	4	1	1	0	wBm_chung_2019
IPR002136:Ribosomal protein L4/L1e	1	7	1	1	0.955734	wBm_chung_2019
IPR002143:Ribosomal protein L1	1	7	1	1	0.955734	wBm_chung_2019
IPR002156:Ribonuclease H domain	1	7	1	1	0.955734	wBm_chung_2019
IPR002176:Crossover junction endodeoxyribonuclease RuvC	0	4	1	1	0	wBm_chung_2019
IPR002192:Pyruvate phosphate dikinase, PEP/pyruvate-binding	0	5	1	1	0	wBm_chung_2019
IPR002195:Dihydroorotase, conserved site	1	9	1	1	0.714431	wBm_chung_2019
IPR002208:SecY/SEC61-alpha family	0	4	1	1	0	wBm_chung_2019
IPR002293:Amino acid/polyamine transporter I	1	7	1	1	0.955734	wBm_chung_2019
IPR002298:DNA polymerase A	1	9	1	1	0.714431	wBm_chung_2019
IPR002307:Tyrosine-tRNA ligase	1	7	1	1	0.955734	wBm_chung_2019
IPR002312:Aspartyl/Asparaginyl-tRNA synthetase, class IIb	1	6	1	1	1.14865	wBm_chung_2019
IPR002317:Serine-tRNA ligase, type1	1	7	1	1	0.955734	wBm_chung_2019
IPR002326:Cytochrome c1	1	9	1	1	0.714431	wBm_chung_2019
IPR002327:Cytochrome c, class IA/ IB	1	7	1	1	0.955734	wBm_chung_2019
IPR002363:Ribosomal protein L10, eubacterial, conserved site	0	5	1	1	0	wBm_chung_2019
IPR002372:Pyrrolo-quinoline quinone repeat	0	4	1	1	0	wBm_chung_2019
IPR002421:5'-3' exonuclease, N-terminal	1	9	1	1	0.714431	wBm_chung_2019
IPR002429:Cytochrome c oxidase subunit II-like C-terminal	1	7	1	1	0.955734	wBm_chung_2019
IPR002467:Peptidase M24A, methionine aminopeptidase, subfamily 1	1	8	1	1	0.817869	wBm_chung_2019
IPR002501:Pseudouridine synthase II, N-terminal	0	3	1	1	0	wBm_chung_2019
IPR002502:N-acetylmuramoyl-L-alanine amidase domain	0	2	1	1	0	wBm_chung_2019
IPR002524:Cation efflux protein	1	6	1	1	1.14865	wBm_chung_2019
IPR002547:tRNA-binding domain	1	7	1	1	0.955734	wBm_chung_2019
IPR002549:Transmembrane protein TqsA-like	1	8	1	1	0.817869	wBm_chung_2019
IPR002583:Ribosomal protein S20	1	7	1	1	0.955734	wBm_chung_2019
IPR002606:Riboflavin kinase, bacterial	0	5	1	1	0	wBm_chung_2019
IPR002616:tRNA-guanine(15) transglycosylase-like	1	6	1	1	1.14865	wBm_chung_2019
IPR002622:Transposase, Synechocystis PCC 6803	0	4	1	1	0	wBm_chung_2019
IPR002625:Smr domain	1	9	1	1	0.714431	wBm_chung_2019
IPR002641:Patatin-like phospholipase domain	0	1	1	1	0	wBm_chung_2019
IPR002646:Poly A polymerase, head domain	1	7	1	1	0.955734	wBm_chung_2019
IPR002677:Ribosomal protein L32p	1	7	1	1	0.955734	wBm_chung_2019
IPR002740:EVE domain	0	1	1	1	0	wBm_chung_2019
IPR002758:Na+/H+ antiporter subunit E	1	8	1	1	0.817869	wBm_chung_2019
IPR002818:DJ-1/PfpI	1	8	1	1	0.817869	wBm_chung_2019
IPR002830:UbiD decarboxylyase family	1	6	1	1	1.14865	wBm_chung_2019
IPR002903:Ribosomal RNA small subunit methyltransferase H	1	6	1	1	1.14865	wBm_chung_2019
IPR002939:Chaperone DnaJ, C-terminal	1	6	1	1	1.14865	wBm_chung_2019
IPR003111:Lon, substrate-binding domain	1	7	1	1	0.955734	wBm_chung_2019
IPR003124:WH2 domain	1	6	1	1	1.14865	wBm_chung_2019
IPR003135:ATP-grasp fold, ATP-dependent carboxylate-amine ligase-type	1	7	1	1	0.955734	wBm_chung_2019
IPR003180:Methylpurine-DNA glycosylase (MPG)	1	9	1	1	0.714431	wBm_chung_2019
IPR003319:ATP synthase YMF19-like, N-terminal	0	2	1	1	0	wBm_chung_2019
IPR003369:Sec-independent protein translocase protein TatA/B/E	1	6	1	1	1.14865	wBm_chung_2019
IPR003382:Flavoprotein	1	7	1	1	0.955734	wBm_chung_2019
IPR003395:RecF/RecN/SMC, N-terminal	0	3	1	1	0	wBm_chung_2019
IPR003399:Mce/MlaD	0	3	1	1	0	wBm_chung_2019
IPR003423:Outer membrane efflux protein	0	4	1	1	0	wBm_chung_2019
IPR003425:CCB3/YggT	0	5	1	1	0	wBm_chung_2019
IPR003451:4-hydroxy-3-methylbut-2-enyl diphosphate reductase	1	6	1	1	1.14865	wBm_chung_2019
IPR003453:ABC transport permease subunit MlaE, Proteobacteria	0	2	1	1	0	wBm_chung_2019
IPR003488:DNA recombination-mediator protein A	0	2	1	1	0	wBm_chung_2019
IPR003494:SHS2 domain inserted in FtsA	1	7	1	1	0.955734	wBm_chung_2019
IPR003500:Sugar-phosphate isomerase, RpiB/LacA/LacB family	0	5	1	1	0	wBm_chung_2019
IPR003507:Peptidase family S66	0	2	1	1	0	wBm_chung_2019
IPR003509:Uncharacterised protein family UPF0102	0	1	1	1	0	wBm_chung_2019
IPR003524:Phospho-N-acetylmuramoyl-pentapeptide transferase	1	8	1	1	0.817869	wBm_chung_2019
IPR003526:2-C-methyl-D-erythritol 2,4-cyclodiphosphate synthase	1	7	1	1	0.955734	wBm_chung_2019
IPR003544:Cytochrome c-type biogenesis protein CcmB	1	8	1	1	0.817869	wBm_chung_2019
IPR003568:Cytochrome c-type biogenesis protein CcmF	0	4	1	1	0	wBm_chung_2019
IPR003583:Helix-hairpin-helix DNA-binding motif, class 1	0	2	1	1	0	wBm_chung_2019
IPR003607:HD/PDEase domain	1	6	1	1	1.14865	wBm_chung_2019
IPR003615:HNH nuclease	0	3	1	1	0	wBm_chung_2019
IPR003651:Endonuclease III-like, iron-sulphur cluster loop motif	1	6	1	1	1.14865	wBm_chung_2019
IPR003661:Signal transduction histidine kinase, dimerisation/phosphoacceptor domain	1	8	1	1	0.817869	wBm_chung_2019
IPR003663:Sugar/inositol transporter	0	2	1	1	0	wBm_chung_2019
IPR003664:Fatty acid synthesis PlsX protein	1	6	1	1	1.14865	wBm_chung_2019
IPR003669:Thymidylate synthase ThyX	1	8	1	1	0.817869	wBm_chung_2019
IPR003675:CAAX amino terminal protease	0	2	1	1	0	wBm_chung_2019
IPR003688:Type IV secretion system protein TraG/VirD4	0	4	1	1	0	wBm_chung_2019
IPR003697:Maf-like protein	0	5	1	1	0	wBm_chung_2019
IPR003716:DNA-directed RNA polymerase, omega subunit	1	10	1	1	0.633957	wBm_chung_2019
IPR003717:Recombination protein O, RecO	0	3	1	1	0	wBm_chung_2019
IPR003754:Tetrapyrrole biosynthesis, uroporphyrinogen III synthase	1	8	1	1	0.817869	wBm_chung_2019
IPR003780:COX15/CtaA family	0	5	1	1	0	wBm_chung_2019
IPR003784:BioY protein	0	4	1	1	0	wBm_chung_2019
IPR003788:Protein arginine methyltransferase NDUFAF7	1	6	1	1	1.14865	wBm_chung_2019
IPR003811:Glycerol-3-phosphate acyltransferase, PlsY	1	6	1	1	1.14865	wBm_chung_2019
IPR003812:Fido domain	0	5	1	1	0	wBm_chung_2019
IPR003817:Phosphatidylserine decarboxylase-related	1	7	1	1	0.955734	wBm_chung_2019
IPR003821:1-deoxy-D-xylulose 5-phosphate reductoisomerase	0	5	1	1	0	wBm_chung_2019
IPR003825:Colicin V production, CvpA	0	5	1	1	0	wBm_chung_2019
IPR003849:Preprotein translocase YajC	1	6	1	1	1.14865	wBm_chung_2019
IPR003918:NADH:ubiquinone oxidoreductase	1	10	1	1	0.633957	wBm_chung_2019
IPR003952:Fumarate reductase/succinate dehydrogenase, FAD-binding site	1	6	1	1	1.14865	wBm_chung_2019
IPR003953:FAD-dependent oxidoreductase 2, FAD binding domain	1	6	1	1	1.14865	wBm_chung_2019
IPR003959:ATPase, AAA-type, core	3	25	1	1	0.775482	wBm_chung_2019
IPR004033:UbiE/COQ5 methyltransferase	1	7	1	1	0.955734	wBm_chung_2019
IPR004035:Endonuclease III, iron-sulphur binding site	0	3	1	1	0	wBm_chung_2019
IPR004100:ATPase, F1/V1/A1 complex, alpha/beta subunit, N-terminal domain	1	12	1	1	0.516867	wBm_chung_2019
IPR004107:Integrase, SAM-like, N-terminal	1	10	1	1	0.633957	wBm_chung_2019
IPR004115:GAD-like domain	1	6	1	1	1.14865	wBm_chung_2019
IPR004125:Signal recognition particle, SRP54 subunit, M-domain	1	6	1	1	1.14865	wBm_chung_2019
IPR004143:Biotinyl protein ligase (BPL) and lipoyl protein ligase (LPL), catalytic domain	1	10	1	1	0.633957	wBm_chung_2019
IPR004147:UbiB domain	1	9	1	1	0.714431	wBm_chung_2019
IPR004149:Zinc-finger, NAD-dependent DNA ligase C4-type	0	2	1	1	0	wBm_chung_2019
IPR004160:Translation elongation factor EFTu/EF1A, C-terminal	1	7	1	1	0.955734	wBm_chung_2019
IPR004161:Translation elongation factor EFTu-like, domain 2	3	20	1	1	1.01277	wBm_chung_2019
IPR004268:Peptidoglycan biosynthesis protein MurJ	0	5	1	1	0	wBm_chung_2019
IPR004305:Thiaminase-2/PQQC	0	2	1	1	0	wBm_chung_2019
IPR004358:Signal transduction histidine kinase-related protein, C-terminal	1	8	1	1	0.817869	wBm_chung_2019
IPR004364:Aminoacyl-tRNA synthetase, class II (D/K/N)	1	6	1	1	1.14865	wBm_chung_2019
IPR004365:OB-fold nucleic acid binding domain, AA-tRNA synthetase-type	1	6	1	1	1.14865	wBm_chung_2019
IPR004374:Peptide chain release factor 2	1	7	1	1	0.955734	wBm_chung_2019
IPR004387:Peptidase M50, putative membrane-associated zinc metallopeptidase	1	6	1	1	1.14865	wBm_chung_2019
IPR004389:Ribosomal protein L18, bacterial-type	1	7	1	1	0.955734	wBm_chung_2019
IPR004396:Ribosome-binding ATPase YchF/Obg-like ATPase 1	1	7	1	1	0.955734	wBm_chung_2019
IPR004408:Biotin--acetyl-CoA-carboxylase ligase	1	6	1	1	1.14865	wBm_chung_2019
IPR004437:ParB/RepB/Spo0J partition protein family	0	2	1	1	0	wBm_chung_2019
IPR004464:Fructose-1,6-bisphosphatase class 2/Sedoheputulose-1,7-bisphosphatase	0	5	1	1	0	wBm_chung_2019
IPR004468:CTP synthase	1	7	1	1	0.955734	wBm_chung_2019
IPR004477:ComEC/Rec2-related protein	0	2	1	1	0	wBm_chung_2019
IPR004480:Monothiol glutaredoxin-related	1	8	1	1	0.817869	wBm_chung_2019
IPR004482:Mg chelatase-related protein	0	1	1	1	0	wBm_chung_2019
IPR004491:Heat shock protein HslU	1	9	1	1	0.714431	wBm_chung_2019
IPR004504:DNA repair protein RadA	0	2	1	1	0	wBm_chung_2019
IPR004506:tRNA-specific 2-thiouridylase	1	9	1	1	0.714431	wBm_chung_2019
IPR004507:Flavin prenyltransferase UbiX/Pad1	1	7	1	1	0.955734	wBm_chung_2019
IPR004524:Aspartate-tRNA ligase, type 1	1	6	1	1	1.14865	wBm_chung_2019
IPR004527:Glutamate-tRNA ligase, bacterial/mitochondrial	2	13	1	1	1.04392	wBm_chung_2019
IPR004532:Phenylalanine-tRNA ligase, class IIc, beta subunit	1	7	1	1	0.955734	wBm_chung_2019
IPR004540:Translation elongation factor EFG/EF2	1	6	1	1	1.14865	wBm_chung_2019
IPR004541:Translation elongation factor EFTu/EF1A, bacterial/organelle	1	7	1	1	0.955734	wBm_chung_2019
IPR004569:Pyridoxal phosphate (active vitamin B6) biosynthesis PdxJ	0	4	1	1	0	wBm_chung_2019
IPR004570:CDP-diacylglycerol--glycerol-3-phosphate 3-phosphatidyltransferase	1	8	1	1	0.817869	wBm_chung_2019
IPR004602:UvrABC system subunit A	0	3	1	1	0	wBm_chung_2019
IPR004605:DNA helicase, Holliday junction RuvB type	0	3	1	1	0	wBm_chung_2019
IPR004607:Phosphoribosylglycinamide formyltransferase	1	8	1	1	0.817869	wBm_chung_2019
IPR004636:Acetylornithine/Succinylornithine transaminase family	0	4	1	1	0	wBm_chung_2019
IPR004652:tRNA-dihydrouridine synthase, TIM-barrel, NifR3	1	7	1	1	0.955734	wBm_chung_2019
IPR004655:3-oxoacyl-[acyl-carrier-protein] synthase 3	1	6	1	1	1.14865	wBm_chung_2019
IPR004659:Ribonuclease E/G	1	7	1	1	0.955734	wBm_chung_2019
IPR004722:Dihydroorotase	1	9	1	1	0.714431	wBm_chung_2019
IPR004753:Cell shape determining protein MreB	1	7	1	1	0.955734	wBm_chung_2019
IPR004769:Adenylosuccinate lyase	1	7	1	1	0.955734	wBm_chung_2019
IPR004780:Signal recognition particle protein Ffh	1	6	1	1	1.14865	wBm_chung_2019
IPR004785:Ribose 5-phosphate isomerase B	0	5	1	1	0	wBm_chung_2019
IPR004794:Riboflavin biosynthesis protein RibD	0	1	1	1	0	wBm_chung_2019
IPR004803:tRNA-guanine transglycosylase	1	6	1	1	1.14865	wBm_chung_2019
IPR004807:UvrABC system, subunit B	1	6	1	1	1.14865	wBm_chung_2019
IPR004808:AP endonuclease 1	1	8	1	1	0.817869	wBm_chung_2019
IPR004815:Lon protease, bacterial/eukaryotic-type	1	7	1	1	0.955734	wBm_chung_2019
IPR004838:Aminotransferases, class-I, pyridoxal-phosphate-binding site	0	4	1	1	0	wBm_chung_2019
IPR005031:Coenzyme Q-binding protein COQ10, START domain	0	1	1	1	0	wBm_chung_2019
IPR005121:Ferrodoxin-fold anticodon-binding domain	1	7	1	1	0.955734	wBm_chung_2019
IPR005135:Endonuclease/exonuclease/phosphatase	1	8	1	1	0.817869	wBm_chung_2019
IPR005146:B3/B4 tRNA-binding domain	1	7	1	1	0.955734	wBm_chung_2019
IPR005147:tRNA synthetase, B5-domain	1	7	1	1	0.955734	wBm_chung_2019
IPR005148:Arginyl tRNA synthetase N-terminal domain	1	7	1	1	0.955734	wBm_chung_2019
IPR005151:Tail specific protease	0	1	1	1	0	wBm_chung_2019
IPR005227:Putative pre-16S rRNA nuclease	1	8	1	1	0.817869	wBm_chung_2019
IPR005259:Primosomal protein N'	1	7	1	1	0.955734	wBm_chung_2019
IPR005260:Aspartate kinase, monofunctional class	1	6	1	1	1.14865	wBm_chung_2019
IPR005294:ATP synthase, F1 complex, alpha subunit	1	6	1	1	1.14865	wBm_chung_2019
IPR005311:Penicillin-binding protein, dimerisation domain	1	9	1	1	0.714431	wBm_chung_2019
IPR005467:Histidine kinase domain	1	8	1	1	0.817869	wBm_chung_2019
IPR005474:Transketolase, N-terminal	0	5	1	1	0	wBm_chung_2019
IPR005478:Transketolase, bacterial-like	0	5	1	1	0	wBm_chung_2019
IPR005479:Carbamoyl-phosphate synthetase large subunit-like, ATP-binding domain	1	11	1	1	0.569563	wBm_chung_2019
IPR005480:Carbamoyl-phosphate synthetase, large subunit oligomerisation domain	1	7	1	1	0.955734	wBm_chung_2019
IPR005481:Biotin carboxylase-like, N-terminal domain	0	4	1	1	0	wBm_chung_2019
IPR005482:Biotin carboxylase, C-terminal	0	4	1	1	0	wBm_chung_2019
IPR005483:Carbamoyl-phosphate synthase large subunit, CPSase domain	1	7	1	1	0.955734	wBm_chung_2019
IPR005484:Ribosomal protein L18	1	7	1	1	0.955734	wBm_chung_2019
IPR005496:Integral membrane protein TerC	1	8	1	1	0.817869	wBm_chung_2019
IPR005517:Translation elongation factor EFG/EF2, domain IV	1	6	1	1	1.14865	wBm_chung_2019
IPR005548:Cell division protein FtsQ/DivIB	0	3	1	1	0	wBm_chung_2019
IPR005564:Major capsid protein GpE	0	2	1	1	0	wBm_chung_2019
IPR005632:Chaperone protein Skp	0	4	1	1	0	wBm_chung_2019
IPR005662:GTP-binding protein Era	0	5	1	1	0	wBm_chung_2019
IPR005664:Tetrahydrodipicolinate N-succinyltransferase, transferase hexapeptide repeat family	1	6	1	1	1.14865	wBm_chung_2019
IPR005665:Protein-export membrane protein SecF, bacterial	1	7	1	1	0.955734	wBm_chung_2019
IPR005672:Phosphate transport system permease protein PstA	0	3	1	1	0	wBm_chung_2019
IPR005677:Fumarate hydratase, class II	1	7	1	1	0.955734	wBm_chung_2019
IPR005709:Ribosomal protein S4, bacterial-type	1	7	1	1	0.955734	wBm_chung_2019
IPR005748:DNA mismatch repair protein MutS, type 1	1	6	1	1	1.14865	wBm_chung_2019
IPR005749:Ribosomal protein L15, bacterial-type	1	6	1	1	1.14865	wBm_chung_2019
IPR005750:UDP-N-acetylglucosamine 1-carboxyvinyltransferase	1	8	1	1	0.817869	wBm_chung_2019
IPR005790:DNA polymerase III, delta subunit	0	5	1	1	0	wBm_chung_2019
IPR005814:Aminotransferase class-III	0	5	1	1	0	wBm_chung_2019
IPR005822:Ribosomal protein L13	0	5	1	1	0	wBm_chung_2019
IPR005823:Ribosomal protein L13, bacterial-type	0	5	1	1	0	wBm_chung_2019
IPR005824:KOW	1	6	1	1	1.14865	wBm_chung_2019
IPR005843:Alpha-D-phosphohexomutase, C-terminal	0	2	1	1	0	wBm_chung_2019
IPR005875:Phosphoribosylaminoimidazole carboxylase, ATPase subunit	1	7	1	1	0.955734	wBm_chung_2019
IPR005878:Ribosomal protein L1, bacterial-type	1	7	1	1	0.955734	wBm_chung_2019
IPR005882:Bifunctional UDP-N-acetylglucosamine pyrophosphorylase/glucosamine-1-phosphate N-acetyltransferase	0	3	1	1	0	wBm_chung_2019
IPR005895:ABC transporter, haem export, CcmA	1	6	1	1	1.14865	wBm_chung_2019
IPR005936:Peptidase, FtsH	0	3	1	1	0	wBm_chung_2019
IPR005946:Ribose-phosphate diphosphokinase	0	4	1	1	0	wBm_chung_2019
IPR005953:ATP synthase, F0 complex, subunit C, bacterial/chloroplast	0	2	1	1	0	wBm_chung_2019
IPR005986:Aspartate-semialdehyde dehydrogenase, beta-type	1	6	1	1	1.14865	wBm_chung_2019
IPR006027:NusB/RsmB/TIM44	1	7	1	1	0.955734	wBm_chung_2019
IPR006054:DNA polymerase III epsilon subunit, exonuclease domain	0	4	1	1	0	wBm_chung_2019
IPR006059:Solute-binding family 1	1	7	1	1	0.955734	wBm_chung_2019
IPR006110:RNA polymerase, subunit omega/K/RPB6	1	10	1	1	0.633957	wBm_chung_2019
IPR006119:Resolvase, N-terminal catalytic domain	0	2	1	1	0	wBm_chung_2019
IPR006127:Periplasmic solute binding protein, ZnuA-like	1	9	1	1	0.714431	wBm_chung_2019
IPR006129:Adhesin B	0	3	1	1	0	wBm_chung_2019
IPR006130:Aspartate/ornithine carbamoyltransferase	1	6	1	1	1.14865	wBm_chung_2019
IPR006131:Aspartate/ornithine carbamoyltransferase, Asp/Orn-binding domain	1	6	1	1	1.14865	wBm_chung_2019
IPR006132:Aspartate/ornithine carbamoyltransferase, carbamoyl-P binding	1	6	1	1	1.14865	wBm_chung_2019
IPR006143:RND efflux pump, membrane fusion protein	0	1	1	1	0	wBm_chung_2019
IPR006157:Dihydroneopterin aldolase/epimerase domain	0	5	1	1	0	wBm_chung_2019
IPR006214:Bax inhibitor 1-related	0	5	1	1	0	wBm_chung_2019
IPR006249:Aconitase/Iron-responsive element-binding protein 2	1	6	1	1	1.14865	wBm_chung_2019
IPR006259:Adenylate kinase subfamily	0	4	1	1	0	wBm_chung_2019
IPR006261:dNTP triphosphohydrolase	1	6	1	1	1.14865	wBm_chung_2019
IPR006275:Carbamoyl-phosphate synthase, large subunit	1	7	1	1	0.955734	wBm_chung_2019
IPR006309:DNA polymerase 3, epsilon subunit	0	4	1	1	0	wBm_chung_2019
IPR006312:Sec-independent protein translocase protein TatA/E	1	6	1	1	1.14865	wBm_chung_2019
IPR006359:Transcription elongation factor GreA	1	6	1	1	1.14865	wBm_chung_2019
IPR006361:Uroporphyrinogen decarboxylase HemE	0	5	1	1	0	wBm_chung_2019
IPR006390:Dihydropteroate synthase	0	5	1	1	0	wBm_chung_2019
IPR006427:Phage portal protein, HK97	0	2	1	1	0	wBm_chung_2019
IPR006467:MiaB-like tRNA modifying enzyme	0	3	1	1	0	wBm_chung_2019
IPR006498:Tail tube protein	0	1	1	1	0	wBm_chung_2019
IPR006517:Archaeophage PsiM2, terminase large subunit	0	2	1	1	0	wBm_chung_2019
IPR006521:Tail protein I	0	3	1	1	0	wBm_chung_2019
IPR006531:Gp5 N-terminal	0	2	1	1	0	wBm_chung_2019
IPR006592:RNA polymerase, N-terminal	0	5	1	1	0	wBm_chung_2019
IPR006641:YqgF/RNase H-like domain	1	8	1	1	0.817869	wBm_chung_2019
IPR006645:NusG, N-terminal	1	7	1	1	0.955734	wBm_chung_2019
IPR006656:Molybdopterin oxidoreductase	1	6	1	1	1.14865	wBm_chung_2019
IPR006667:SLC41 divalent cation transporters, integral membrane domain	0	5	1	1	0	wBm_chung_2019
IPR006668:Magnesium transporter, MgtE intracellular domain	1	7	1	1	0.955734	wBm_chung_2019
IPR006669:Magnesium transporter MgtE	0	5	1	1	0	wBm_chung_2019
IPR006674:HD domain	1	6	1	1	1.14865	wBm_chung_2019
IPR006680:Amidohydrolase-related	1	9	1	1	0.714431	wBm_chung_2019
IPR006700:Ribosomal RNA small subunit methyltransferase E	0	2	1	1	0	wBm_chung_2019
IPR006847:Translation initiation factor IF-2, N-terminal	1	6	1	1	1.14865	wBm_chung_2019
IPR006892:Geminivirus AC4/5, conserved domain 1	0	2	1	1	0	wBm_chung_2019
IPR006935:Helicase/UvrB, N-terminal	1	6	1	1	1.14865	wBm_chung_2019
IPR006944:Bacteriophage/Gene transfer agent portal protein	0	2	1	1	0	wBm_chung_2019
IPR006963:Molybdopterin oxidoreductase, 4Fe-4S domain	1	6	1	1	1.14865	wBm_chung_2019
IPR007066:RNA polymerase Rpb1, domain 3	0	5	1	1	0	wBm_chung_2019
IPR007080:RNA polymerase Rpb1, domain 1	0	5	1	1	0	wBm_chung_2019
IPR007081:RNA polymerase Rpb1, domain 5	0	5	1	1	0	wBm_chung_2019
IPR007083:RNA polymerase Rpb1, domain 4	0	5	1	1	0	wBm_chung_2019
IPR007120:DNA-directed RNA polymerase, subunit 2, domain 6	0	5	1	1	0	wBm_chung_2019
IPR007121:RNA polymerase, beta subunit, conserved site	0	5	1	1	0	wBm_chung_2019
IPR007195:TolB, N-terminal	0	1	1	1	0	wBm_chung_2019
IPR007208:Na(+)/H(+) antiporter subunit F-like	1	10	1	1	0.633957	wBm_chung_2019
IPR007230:Peptidase S59, nucleoporin	0	2	1	1	0	wBm_chung_2019
IPR007474:ApaG domain	1	7	1	1	0.955734	wBm_chung_2019
IPR007481:Stringent starvation protein B	0	5	1	1	0	wBm_chung_2019
IPR007527:Zinc finger, SWIM-type	0	3	1	1	0	wBm_chung_2019
IPR007533:Cytochrome c oxidase assembly protein CtaG/Cox11	1	7	1	1	0.955734	wBm_chung_2019
IPR007627:RNA polymerase sigma-70 region 2	2	19	1	1	0.668301	wBm_chung_2019
IPR007630:RNA polymerase sigma-70 region 4	2	18	1	1	0.711361	wBm_chung_2019
IPR007641:RNA polymerase Rpb2, domain 7	0	5	1	1	0	wBm_chung_2019
IPR007642:RNA polymerase Rpb2, domain 2	0	5	1	1	0	wBm_chung_2019
IPR007644:RNA polymerase, beta subunit, protrusion	0	5	1	1	0	wBm_chung_2019
[truncated: 65,466 more rows]
